# Supplementary material
Source: PubMed Central journal article supplement (PMC5734609)
Supplement: NIHMS75008-supplement-_Supplementary_Appendix.pdf [file NIHMS75008-supplement-_Supplementary_Appendix.pdf]

## Supplementary Appendix

This appendix has been provided by the authors to give readers additional information about their work.

Supplement to: Pan H, Gray R, Braybrooke J, et al. 20-Year risks of breast-cancer recurrence after stopping endocrine therapy at 5 years. *N Engl J Med* 2017;377:1836-46. DOI: 10.1056/NEJMoa1701830

# Contents list

Page  
nos.

- 3 *Writing committee membership, Responsibilities, and EBCTCG steering committee*  
4-7 *EBCTCG collaborators (1985-2017)*  
8 *Supplementary Table S1: Characteristics of the women with ER+ disease*  
9 *Supp. Table S2A: Numbers with chemotherapy scheduled, by TN status and grade*  
*Supp. Table S2B: Numbers with trastuzumab scheduled, by trial design and HER2 status*

## **Analyses of distant recurrence**

- 10 *Supp. Fig S1: TN stage vs distant recurrence in years 0-20*  
11 *Supp. Fig S2: TN status vs distant recurrence in years 5-20*  
12 *Supp. Fig S3: N0 disease – Diameter vs distant recurrence in years 5-20*  
13 *Supp. Fig S4: T1N0 disease – Grade vs distant recurrence in years 5-20*  
14 *Supp. Fig S5: Other factors, given TN status – Rate ratios RRs for distant recurrence*

## **Analyses of any breast cancer event (distant, local or contralateral)**

- 15 *Supp. Fig S6: TN status vs any breast event in years 0-20*  
16 *Supp. Fig S7: TN status vs any breast event in years 5-20*  
17 *Supp. Fig S8: N0 disease – Diameter vs any event in years 5-20*  
18 *Supp. Fig S9: T1N0 disease – Grade vs any breast event in years 5-20*  
19 *Supp. Fig S10: Other factors, given TN status – RRs for any breast event*

## **Analyses of contralateral breast cancer incidence**

- 20 *Supp. Fig S11: All women – contralateral breast cancer in years 0-20*  
21 *Supp. Fig S12: Other factors, given TN status – RRs for contralateral breast cancer*

## **Analyses of breast cancer mortality**

- 22 *Supp. Fig S13: TN status vs breast cancer mortality in years 0-20*  
23 *Supp. Fig S14: TN status vs breast cancer mortality in years 5-20*  
24 *Supp. Fig S15: N0 disease – Diameter vs breast cancer mortality in years 5-20*  
25 *Supp. Fig S16: T1N0 disease – Grade vs breast cancer mortality in years 5-20*  
26 *Supp. Fig S17: Other factors, given TN status – RRs for breast cancer mortality*

## **Analyses of loco-regional recurrence**

- 27 *Supp. Fig S18: TN status vs loco-reg. recurrence in years 0-20*  
28 *Supp. Fig S19: TN status vs loco-reg. recurrence in years 5-20*  
29 *Supp. Fig S20: N0 disease – Diameter vs loco-reg. recurrence in years 5-20*  
30 *Supp. Fig S21: T1N0 disease – Grade vs loco-reg. recurrence in years 5-20*  
31 *Supp. Fig S22: Other factors given TN status – RRs for loco-reg. recurrence*

## **Analyses of mortality without recorded recurrence**

- 32 *Supp. Fig S23A: Other factors, given TN status – RRs for unknown death cause*  
33 *Supp. Fig S23B: – RRs for all non-breast death causes*

## **Design details and references for each of the 88 separate trials**

- 34-36 *Supp. Table S3: Characteristics of the trials and of the women included*  
36-40 References to the 88 trials

## **Writing committee**

Hongchao Pan (UK Medical Research Council Population Health Research Unit [PHRU]), Richard Gray (PHRU), Jeremy Braybrooke (PHRU), Christina Davies (PHRU), Carolyn Taylor (PHRU), Paul McGale (PHRU), Richard Peto (PHRU), Kathy I Pritchard (Sunnybrook Hospital, Toronto), Jonas Bergh (Karolinska Institutet, Stockholm), Mitch Dowsett (Royal Marsden Hospital and Institute of Cancer Research, London), Daniel F Hayes (University of Michigan Comprehensive Cancer Center).

## **Responsibilities**

The writing committee designed the study and drafted the report, circulated it for comment to the Early Breast Cancer Trialists' Collaborative Group (EBCTCG), then revised it. The data were analyzed by the EBCTCG Secretariat within the MRC PHRU, Nuffield Department of Population Health, Oxford, UK (HP, RG, JB, CD, CT, PM, and RP), who vouch for the data and the analysis. Funders had no role in study design, data collection, data analysis, data interpretation or report writing. The EBCTCG secretariat had full access to the data and the writing committee had full access to analyses and final responsibility for deciding to submit for publication. There are no commercial sponsors or confidentiality agreements.

## **EBCTCG steering committee**

J Bergh (co-chair), K Pritchard (co-chair), K Albain, S Anderson, R Arriagada, W Barlow, J Bartlett, E Bergsten-Nordström, J Bliss, F Boccardo, R Bradley\*, E Brain, J Braybrooke\*, D Cameron, M Clarke\*, A Coates, R Coleman, C Correa, J Costantino, J Cuzick, N Davidson, C Davies\*, D Dodwell\*, A Di Leo, M Dowsett, M Ewertz, J Forbes, R Gelber, M Gnant, A Goldhirsch, P Goodwin, R Gray\*, D Hayes, C Hill, J Ingle, R Jagsi, W Janni, S Loibl, E MacKinnon\*, M Martin, P McGale\*, H Mukai, L Norton, Y Ohashi, S Paik, H Pan\*, E Perez, R Peto\*, M Piccart, L Pierce, P Poortmans, V Raina, P Ravdin, M Regan, J Robertson, E Rutgers, D Slamon, J Sparano, S Swain, C Taylor\*, A Tutt, G Viale, G von Minckwitz, X Wang, T Whelan, N Wilcken, E Winer, N Wolmark, W Wood, M Zambetti. \*EBCTCG Secretariat, PHRU.

## **EBCTCG collaborators, listed alphabetically by institution or group and then alphabetically by name**

*AARTM 048/13/2000 Multicentre Study Group, Spain*—J A Alberro, B Ballester, P Deulofeu, R Fábregas, M Fraile, J M Gubern, J Janer, A Moral, J L de Pablo, G Peñalva, P Puig, M Ramos, R Rojo, P Santesteban, C Serra, M Solà, L Solarnau, J Solsona, E Veloso, S Vidal.

*ACETBC, Tokyo, Japan*—O Abe, R Abe, K Enomoto, K Kikuchi, H Koyama, H Masuda, Y Nomura, Y Ohashi, K Sakai, K Sugimachi, M Toi, T Tominaga, J Uchino, M Yoshida.

*Addenbrooke's Hospital, Cambridge, UK*—J L Haybittle.

*Anglo-Celtic Cooperative Oncology Group, UK*—C F Leonard.

*ARCOSEIN Group, France*—G Calais, P Garaud.

*ATLAS Trial Collaborative Study Group, Oxford, UK*—V Collett, C Davies, A Delmestri, J Sayer.

*Auckland Breast Cancer Study Group, New Zealand*—V J Harvey, I M Holdaway, R G Kay, B H Mason.

*Australian New Zealand Breast Cancer Trials Group, Sydney, Australia*—J F Forbes, N Wilcken.

*Austrian Breast Cancer Study Group, Vienna, Austria*—M Balic, R Bartsch, C Fesl, F Fitzal, H Fohler, M Gnant, R Greil, R Jakesz, C Marth, B Mlineritsch, G Pfeiler, C F Singer, G G Steger, H Stöger.

*Beatson Oncology Centre, Glasgow, UK*—P Canney, H M A Yosef.

*Belgian Adjuvant Breast Cancer Project, Liège, Belgium*—C Focan.

*Berlin-Buch Akademie der Wissenschaften, Germany*—U Peek.

*Birmingham General Hospital, UK*—G D Oates, J Powell.

*Bordeaux Institut Bergonié, France*—M Durand, L Mauriac.

*Bordet Institute, Brussels, Belgium*—A Di Leo, S Dolci, D Larsimont, J M Nogaret, C Philippson, M J Piccart.

*Bradford Royal Infirmary, UK*—M B Masood, D Parker, J J Price.

*Breast Cancer International Research Group (BCIRG)*—M A Lindsay, J Mackey, M Martin.

*Breast Cancer Study Group of the Comprehensive Cancer Centre, Limburg, Netherlands*—P S G J Hupperets.

*British Association of Surgical Oncology BASO II Trialists, London, UK*—T Bates, R W Blamey, U Chetty, I O Ellis, E Mallon, D A L Morgan, J Patnick, S Pinder.

*British Columbia Cancer Agency, Vancouver, Canada*—C Lohrisch, A Nichol.

*Canadian Cancer Trials Group, Kingston, Ontario, Canada*—V H Bramwell, B E Chen, K Gelmon, P E Goss, M N Levine, W Parulekar, J L Pater, K I Pritchard, L E Shepherd, D Tu, T Whelan.

*Cancer and Leukemia Group B, Washington DC, USA*—D Berry, G Broadwater, C Cirrincione, H Muss, L Norton, R B Weiss.

*Cancer Care Ontario, Canada*—H T Abu-Zahra.

*Cancer Research Centre of the Russian Academy of Medical Sciences, Moscow, Russia*—S M Portnoj.

*Cancer Research UK Clinical Trials Unit (CRCTU), NCRI, Birmingham, UK*—S Bowden, C Brookes, J Dunn, I Fernando, M Lee, C Poole, D Rea, D Spooner.

*Cardiff Trialists Group, UK*—P J Barrett-Lee, R E Mansel, I J Monypenny.

*Case Western Reserve University, Cleveland, OH, USA*—N H Gordon.

*Central Oncology Group, Milwaukee, WI, USA*—H L Davis.

*Centre for Cancer Prevention, Wolfson Institute of Preventive Medicine, Queen Mary, University of London, UK*—J Cuzick, I Sestak.

*Centre Léon-Bérard, Lyon, France*—Y Lehingue, P Romestaing.

*Centre Paul Lamarque, Montpellier, France*—J B Dubois.

*Centre Régional François Baclesse, Caen, France*—T Delozier, B Griffon, J Mace Lesec'h.

*Centre René Huguenin, Paris, St Cloud, France*—E Brain, B de La Lande, E Mouret-Fourme.

*Centro Oncologico, Trieste, Italy*—G Mustacchi.

*Charles University in Prague, First Faculty of Medicine, Department of Oncology of the First Faculty of Medicine and General Teaching Hospital, Czech Republic*—L Petruzelka, O Pribylova.

*Cheltenham General Hospital, UK*—J R Owen.

*Chemo N0 Trial Group, Germany*—N Harbeck, F Jänicke, C Meisner, M Schmitt, C Thomssen.

*Chicago University, IL, USA*—P Meier.

*Chinese Academy of Medical Sciences, Beijing, People's Republic of China (in collaboration with the Oxford CTSU)*—Y Shan, Y F Shao, X Wang, D B Zhao (CTSUs: Z M Chen, H C Pan).

*Christie Hospital and Holt Radium Institute, Manchester, UK*—A Howell, R Swindell.

*Clinical Trial Service Unit (CTSUs), Oxford, UK (ie, members of the CTSU-based EBCTCG Secretariat)*—C Boddington, R Bradley, J Braybrooke, J A Burrett, M Clarke, D Cutter, C Davies, D Dodwell, F Duane, V Evans, L Gettins, J Godwin, R Gray, S James, A Kerr, H Liu, E MacKinnon, G Mannu, P McGale, T McHugh, P Morris, H C Pan, R Peto, S Read, C Taylor, Y Wang, Z Wang.

*Coimbra Instituto de Oncologia, Portugal*—J Albano, C F de Oliveira, H Gervásio, J Gordilho.

*Copenhagen Breast Cancer Trials, Copenhagen, Denmark*—B Ejlertsen, M-B Jensen, H Johansen, H Mouridsen, T Palshof.

*Dana-Farber Cancer Institute, Boston, MA, USA*—R S Gelman, J R Harris, D Hayes, C Henderson, C L Shapiro, E Winer.

*Danish Breast Cancer Cooperative Group, Copenhagen, Denmark*—P Christiansen, B Ejlertsen, M Ewertz, M-B Jensen, H T Mouridsen.

Düsseldorf University, Germany—T Fehm, H J Trampisch.

Dutch Working Party for Autologous Bone Marrow Transplant in Solid Tumours, Amsterdam & Groningen, Netherlands—O Dalesio, E G E de Vries, S Rodenhuis, H van Tinteren.

Eastern Cooperative Oncology Group, Boston, MA, USA—R L Comis, N E Davidson, R Gray, N Robert, G Sledge, L J Solin, J A Sparano, D C Tormey, W Wood.

Edinburgh Breast Unit, UK—D Cameron, U Chetty, J M Dixon, P Forrest, W Jack, I Kunkler.

Elim Hospital, Hamburg, Germany—J Rossbach.

Erasmus MC/Daniel den Hoed Cancer Center, Rotterdam, Netherlands— J G M Klijn, A D Treurniet-Donker, W L J van Putten.

European Institute of Oncology, Milan, Italy—N Rotmensz, U Veronesi, G Viale.

European Organization for Research and Treatment of Cancer, Brussels, Belgium—H Bartelink, N Bijker, J Bogaerts, F Cardoso, T Cufer, J P Julien, E Rutgers, C J H van de Velde.

Evanston Hospital, IL, USA—M P Cunningham.

E-ZO-FAST, Z-FAST and ZO-FAST study groups (international)—A M Brufsky, R E Coleman, H A Llombart, for Novartis Pharmaceuticals.

Finnish Breast Cancer Group, Finland—R Huovinen, H Joensuu.

Fondazione Maugeri Pavia, Italy—A Costa.

Fondazione Michelangelo, Milan, Italy—G Bonadonna, L Gianni, P Valagussa.

Fox Chase Cancer Center, Philadelphia, PA, USA—L J Goldstein.

French Adjuvant Study Group (GFEA), Guyancourt, France—J Bonnetterre, P Fargeot, P Fumoleau, P Kerbrat, E Luporsi, M Namer.

GEICAM, Spanish Breast Cancer Group, Spain—E Carrasco, M Martin, M A Segui.

German Adjuvant Breast Group (GABG), Frankfurt, Germany—W Eiermann, J Hilfrich, W Jonat, M Kaufmann, R Kreienberg, M Schumacher.

German Breast Cancer Study Group (BMFT), Freiburg, Germany—G Bastert, H Rauschecker, R Sauer, W Sauerbrei, A Schauer, M Schumacher.

German Breast Group (GBG), Neu-Isenburg, Germany—J U Blohmer, S D Costa, H Eidtmann, B Gerber, C Jackisch, S Loibl, G von Minckwitz.

Ghent University Hospital, Belgium—A de Schryver, L Vakaet.

GIVIO Interdisciplinary Group for Cancer Care Evaluation, Chieti, Italy—M Belfiglio, A Nicolucci, F Pellegrini, M C Pirozzoli, M Sacco, M Valentini.

Glasgow Victoria Infirmary, UK—C S McArdle, D C Smith, S Stallard.

Groote Schuur Hospital, Cape Town, South Africa—D M Dent, C A Gudgeon, A Hacking, E Murray, E Panieri, ID Werner.

Gruppo Oncologico Clinico Cooperativo del Nord Est, Aviano, Italy—E Galligioni.

Grupo Oncológico Cooperativo del Sur (GOCS), Argentina—B Leone, C T Vallejo, A Zwenger.

Gruppo Oncologico Dell'Italia Meridionale (GOIM), Rome, Italy—M Lopez.

Guadalajara Hospital de 20 Noviembre, Mexico—A Erazo, J Y Medina.

Gunma University, Japan—J Horiguchi, H Takei.

Guy's Hospital, London, UK—I S Fentiman, J L Hayward, R D Rubens, D Skilton.

Heidelberg University I, Germany—H Scheurlen.

Heidelberg University II, Germany—M Kaufmann, H C Sohn.

Helios Klinikum Berlin-Buch, Germany—M Untch.

Hellenic Breast Surgeons Society, Greece—U Dafni, C Markopoulos.

Hellenic Cooperative Oncology Group, Athens, Greece—U Dafni, G Fountzilas.

Hellenic Oncology Research Group, Greece—D Mavroudis.

Helsinki Deaconess Medical Centre, Finland—P Klefstrom.

Helsinki University, Finland—C Blomqvist, T Saarto.

Hospital del Mar, Barcelona, Spain—M Gallen.

Humanitas Cancer Center, Milan, Italy—C Tinterri.

Innsbruck University, Austria—R Margreiter.

Institut Claudius Regaud, Toulouse, France—B de Lafontan, J Mihura, H Roché.

Institut Curie, Paris, France—B Asselain, R J Salmon, J R Vilcoq.

Institut Gustave-Roussy, Paris, France—F André, R Arriagada, S Delaloge, C Hill, S Koscielny, S Michiels, C Rubino.

Institute of Cancer Research Clinical Trials and Statistics Unit (ICR-CTSUs, NCRI), UK—R A'Hern, J Bliss, P Ellis, L Kilburn, J R Yarnold.

Integraal Kankercentrum, Amsterdam, Netherlands—J Benraadt, M Kooi, A O van de Velde, J A van Dongen, J B Vermorcken.

International Breast Cancer Study Group (IBCSG), Bern, Switzerland—M Castiglione, A Coates, M Colleoni, J Collins, J Forbes, R D Gelber, A Goldhirsch, J Lindtner, K N Price, M M Regan, C M Rudenstam, H J Senn, B Thuerlimann.

International Collaborative Cancer Group, Charing Cross Hospital, London, UK—J M Bliss, C E D Chilvers, R C Coombes, E Hall, M Marty.

International Drug Development Institute, Louvain-la-Neuve, Belgium—M Buysse.

*International TABLE Study Group, Berlin, Germany*—K Possinger, P Schmid, M Untch, D Wallwiener.

*IRCCS AOU San Martino – IST Istituto Nazionale per la Ricerca sul Cancro, Genova, Italy*—C Bighin, P Bruzzi, L Del Mastro, B Dozin, S Pastorino, P Pronzato, M R Sertoli.

*ISD Cancer Clinical Trials Team (incorporating the former Scottish Cancer Therapy Network), Edinburgh, UK*—L Foster, W D George, H J Stewart, P Stroner.

*Israel NSABC, Tel Aviv, Israel*—R Borovik, H Hayat, M J Inbar, T Peretz, E Robinson.

*Istituto Nazionale per lo Studio e la Cura dei Tumori, Milan, Italy*—T Camerini, F Formelli, G Martelli, M G Di Mauro, P Valagussa.

*Istituto Nazionale Tumori IRCCS Fondazione Pascale, Napoli, Italy*—F Perrone.

*Istituto Scientifico Romagnolo per lo Studio e la Cura dei Tumori, Meldola, Italy*—D Amadori.

*Italian Cooperative Chemo-Radio-Surgical Group, Bologna, Italy*—A Martoni, F Pannuti.

*Italian Oncology Group for Clinical Research (GOIRC), Parma, Italy*— R Camisa, A Musolino, R Passalacqua.

*Japan Clinical Oncology Group—Breast Cancer Study Group, Japan*—H Iwata, T Shien.

*Japanese Foundation for Multidisciplinary Treatment of Cancer, Tokyo, Japan*—O Abe, T Ikeda, K Inokuchi, K Kikuchi, K Sawa.

*Kawasaki Medical School, Japan*—H Sonoo.

*Klinikum Bayreuth, Germany*—M Sadoon, A H Tulusan.

*Kobe Breast Cancer Oncology Group, Japan*—N Kohno, M Miyashita, S Takao.

*Korean Cancer Study Group (KCSG), Seoul, South Korea*—J.-H Ahn, K H Jung.

*Krakow Institute of Oncology, Poland*—S Korzeniowski, J Skolyszewski.

*Kumamoto University Group, Japan*—M Ogawa, J Yamashita.

*Leiden University Medical Center, Netherlands*—E Bastiaannet, G J Liefers, C J H van de Velde.

*Leuven Akademisch Ziekenhuis, Gasthuisberg, Belgium*—R Christiaens, P Neven, R Paridaens, W Van den Bogaert.

*Ludwig-Maximilians University, Munich, Germany*—S Braun.

*Marseille Laboratoire de Cancérologie Biologique APM, France*—P Martin, S Romain.

*Medical University Vienna – General Hospital - Department of Obstetrics and Gynaecology and Department of Medicine I, Vienna, Austria*—M Janauer, M Seifert, P Sevelda, C C Zielinski.

*Memorial Sloan-Kettering Cancer Center, New York, NY, USA*—T Hakes, C A Hudis, L Norton, R Wittes.

*Metaxas Memorial Cancer Hospital, Athens, Greece*—G Giokas, D Kondylis, B Lissaios.

*Mexican National Medical Center, Mexico City, Mexico*—R de la Huerta, M G Sainz.

*National Cancer Center, Goyang, South Korea*—J Ro.

*National Cancer Institute, Bethesda, MD, USA*—K Camphausen, D Danforth, A Lichter, M Lippman, D Smart, S Steinberg.

*National Cancer Institute of Bari, Italy*—C D’Amico, M Lioce, A Paradiso.

*National Kyushu Cancer Center, Japan*—Y Nomura, S Ohno.

*National Surgical Adjuvant Breast and Bowel Project (NSABP), Pittsburgh, PA, USA*—S Anderson, G Bass, A Brown, J Bryant, J Costantino, J Dignam, B Fisher, C Geyer, E P Mamounas, S Paik, C Redmond, S Swain, L Wickerham, N Wolmark.

*National Surgical Adjuvant Study Group (N-SAS-BC), Japan*—T Aihara, Y Hozumi, Y Nomura.

*Nolvadex Adjuvant Trial Organisation, London, UK*—M Baum, I M Jackson, M K Palmer.

*North Central Cancer Treatment Group, Mayo Clinic, Rochester, MN, USA*—E Perez, J N Ingle, V J Suman.

*North Sweden Breast Cancer Group, Umeå, Sweden*—N O Bengtsson, S Emdin, H Jonsson.

*North-West Oncology Group (GONO), Italy*—L Del Mastro, M Venturini.

*North-Western British Surgeons, Manchester, UK*—J P Lythgoe, R Swindell.

*Northwick Park Hospital, London, UK*—M Kissin.

*Norwegian Breast Cancer Group, Oslo, Norway*—B Erikstein, E Hannisdal, A B Jacobsen, K V Reinertsen, J E Varhaug.

*Norwegian Radium Hospital, Oslo, Norway*—B Erikstein, S Gundersen, M Hauer-Jensen, H Høst, A B Jacobsen, R Nissen-Meyer.

*Nottingham City Hospital, UK*—R W Blamey, A K Mitchell, D A L Morgan, J F R Robertson.

*Oita Prefectural Hospital, Japan*—H Ueo.

*Oncofrance, Paris, France*—M Di Palma, G Mathé, J L Misset.

*Ontario Clinical Oncology Group, Hamilton, Canada*—M Levine, K I Pritchard, T Whelan.

*Osaka City University, Japan*—K Morimoto.

*Osaka National Hospital, Japan*—K Sawa, Y Takatsuka.

*Oxford Radcliffe Hospitals NHS Trust, Churchill Hospital, Oxford, UK*—E Crossley, A Harris, D Talbot, M Taylor.

*Parma Hospital, Italy*—G Cocconi, B di Blasio.

*Petrov Research Institute of Oncology, St Petersburg, Russia*—V Ivanov, R Paltuev, V Semiglazov.

*Piedmont Oncology Association, Winston-Salem, NC, USA*—J Brockschmidt, M R Cooper.

*Pretoria University, South Africa*—C I Falkson.

*ProBONE study group, Marburg, Germany*—P Hadji.

*Royal Marsden NHS Trust, London and Sutton, UK*—R A'Hern, M Dowsett, A Makris, M Parton, K Pennert, T J Powles, I E Smith, J R Yarnold.

*St George's Hospital, London, UK*—J C Gazet.

*St George Hospital, Sydney, Australia*—L Browne, P Graham.

*St Luke's Hospital, Dublin, Ireland*—N Corcoran.

*SABRE trial group (international)*—G Clack, C Van Poznak.

*Sardinia Oncology Hospital A Businico, Cagliari, Sardinia*—N Deshpande, L di Martino.

*SASIB International Trialists, Cape Town, South Africa*—P Douglas, A Hacking, H Høst, A Lindtner, G Notter.

*Saskatchewan Cancer Foundation, Regina, Canada*—A J S Bryant, G H Ewing, L A Firth, J L Krushen-Kosloski.

*Scandinavian Adjuvant Chemotherapy Study Group, Oslo, Norway*—R Nissen-Meyer.

*South Sweden Breast Cancer Group, Lund, Sweden*—H Anderson, F Killander, P Malmström, L Rydén.

*South-East Sweden Breast Cancer Group, Linköping, Sweden*—L-G Arnesson, J Carstensen, M Dufmats, H Fohlin, B Nordenskjöld, M Söderberg.

*South-Eastern Cancer Study Group and Alabama Breast Cancer Project, Birmingham, AL, USA*—J T Carpenter.

*Southampton Oncology Centre, UK*—N Murray, G T Royle, P D Simmonds.

*Southwest Oncology Group, San Antonio, TX, USA*—K Albain, W Barlow, J Crowley, D Hayes, J Gralow, G Hortobagyi, R Livingston, S Martino, C K Osborne, P M Ravdin.

*Stockholm Breast Cancer Study Group, Sweden*—J Bergh, T Bondesson, F Celebioglu, K Dahlberg, T Fornander, I Fredriksson, J Frisell, E Göransson, M Iiristo, U Johansson, E Lenner, L Löfgren, P Nikolaidis, L Perbeck, S Rotstein, K Sandelin, L Skoog, G Svane, E af Trampe, C Wadström.

*SUCCESS-Study Group, University of Düsseldorf, Germany*—W Janni.

*Swiss Group for Clinical Cancer Research (SAKK), Bern, and OSAKO, St Gallen, Switzerland*—M Castiglione, A Goldhirsch, R Maibach, H J Senn, B Thürlimann.

*Tamoxifen Exemestane Adjuvant Multinational (TEAM) trial*—E Bastiaannet, P Hadji, Y Hozumi, D Rea, C J H van de Velde.

*Tampere University Hospital, Finland*—K Holli, K Rouhento.

*Tel Aviv Sourasky Medical Center, Sackler School of Medicine, Tel Aviv University, Israel*—T Safra.

*Tel Aviv University, Israel*—H Brenner, A Hercbergs.

*Tokyo Cancer Institute Hospital, Japan*—M Yoshimoto.

*Toronto-Edmonton Breast Cancer Study Group, Canada*—A H G Paterson, K I Pritchard.

*Toronto Princess Margaret Hospital, Canada*—A Fyles, J W Meakin, T Panzarella, K I Pritchard.

*Tunis Institut Salah Azaiz, Tunisia*—J Bahi.

*UCBG, French Breast Cancer Intergroup UNICANCER, France*—S Delaloge, J Lemonnier, A L Martin.

*UK Multicentre Cancer Chemotherapy Study Group, London, UK*—M Reid, M Spittle.

*UK/ANZ DCIS Trial*—H Bishop, N J Bundred, J Cuzick, I O Ellis, I S Fentiman, J F Forbes, S Forsyth, W D George, S E Pinder, I Sestak.

*UK/Asia Collaborative Breast Cancer Group, London, UK*—G P Deutsch, R Gray, D L W Kwong, V R Pai, R Peto, F Senanayake.

*University and Istituto Nazionale per la Ricerca sul Cancro, Genoa, Italy on behalf of GROCTA trialists*—F Boccardo, A Rubagotti.

*University College London, UK*—M Baum, S Forsyth, A Hackshaw, J Houghton, J Ledermann, K Monson, JS Tobias.

*University Federico II, Naples, Italy*—C Carlomagno, M De Laurentiis, S De Placido.

*University of Edinburgh, UK*—L Williams.

*University of Leeds, UK*—R Bell, D Cameron, R E Coleman, D Dodwell, S Hinsley, H C Marshall.

*University of Michigan, USA*—D Hayes, L J Pierce.

*University of Saarland, Germany*—E Solomayer.

*University of Sheffield, UK*—R E Coleman, J M Horsman, J Lester, M C Winter.

*University of Texas MD Anderson Cancer Center, Houston, TX, USA*—A U Buzdar, L Hsu.

*University of Wisconsin, USA*—R R Love.

*Uppsala-Örebro Breast Cancer Study Group, Sweden*—J Ahlgren, H Garmo, L Holmberg, G Liljegren, H Lindman, F Wärnberg.

*U.S. Oncology, Houston, USA*—L Asmar, S E Jones.

*Washington University, St Louis, Missouri, USA*—R Aft.

*West German Study Group (WSG), Germany*—O Gluz, N Harbeck, C Liedtke, U Nitz.

*West of Scotland Breast Trial Group, Glasgow, UK*—A Litton.

*West Sweden Breast Cancer Study Group, Gothenburg, Sweden*—A Wallgren, P Karlsson, B K Linderholm.

*Western Cancer Study Group, Torrance, CA, USA*—R T Chlebowski.

*Würzburg University, Germany*—H Caffier.

**Table S1: Characteristics of women with ER+ disease scheduled to stop ET at 5 years, and of the 62,923 who remained disease free at the end of 5 years of ET**

| Characteristics                                           | In year 0-5 analyses<br>(N = 74,194) |      | In year 5-20 analyses<br>(N = 62,923) |      |
|-----------------------------------------------------------|--------------------------------------|------|---------------------------------------|------|
|                                                           | n                                    | %    | n                                     | %    |
| <b>Age at diagnosis (years)</b>                           |                                      |      |                                       |      |
| <35                                                       | 1585                                 | 2.1  | 1009                                  | 1.6  |
| 35-44                                                     | 10344                                | 13.9 | 7859                                  | 12.5 |
| 45-54                                                     | 22568                                | 30.4 | 19326                                 | 30.7 |
| 55-64                                                     | 25439                                | 34.3 | 22337                                 | 35.5 |
| 65-74                                                     | 14258                                | 19.2 | 12392                                 | 19.7 |
| <b>Tumor diameter (mm)</b>                                |                                      |      |                                       |      |
| 1-10 (T1a/b)                                              | 10135                                | 13.7 | 9418                                  | 15.0 |
| 11-20 (T1c)                                               | 31751                                | 42.8 | 28158                                 | 44.7 |
| 21-30 (T2)                                                | 20708                                | 27.9 | 16461                                 | 26.2 |
| 31-50 (T2)                                                | 11600                                | 15.6 | 8886                                  | 14.1 |
| <b>Axillary nodal status</b>                              |                                      |      |                                       |      |
| N0                                                        | 29925                                | 40.3 | 28847                                 | 45.8 |
| N1-3                                                      | 31936                                | 43.0 | 25292                                 | 40.2 |
| N4-9                                                      | 12333                                | 16.6 | 8784                                  | 14.0 |
| <b>Tumor grade (differentiation)</b>                      |                                      |      |                                       |      |
| Low (well differentiated)                                 | 8913                                 | 12.0 | 8023                                  | 12.8 |
| Moderate                                                  | 29158                                | 39.3 | 23490                                 | 37.3 |
| High (poorly differentiated)                              | 17137                                | 23.1 | 12077                                 | 19.2 |
| Unknown grade                                             | 18986                                | 25.6 | 19333                                 | 30.7 |
| <b>Ki-67 status</b>                                       |                                      |      |                                       |      |
| 0-9%                                                      | 3166                                 | 4.3  | 2796                                  | 4.4  |
| 10-19%                                                    | 3379                                 | 4.6  | 2824                                  | 4.5  |
| ≥20%                                                      | 2919                                 | 3.9  | 2072                                  | 3.3  |
| Unknown                                                   | 64730                                | 87.2 | 55231                                 | 87.8 |
| <b>Progesterone receptor status</b>                       |                                      |      |                                       |      |
| ER+, PgR-poor                                             | 11733                                | 15.8 | 8875                                  | 14.1 |
| ER+, PgR+                                                 | 56608                                | 76.3 | 45240                                 | 71.9 |
| PgR unknown                                               | 5853                                 | 7.9  | 8808                                  | 14.0 |
| <b>HER2 over-expression</b>                               |                                      |      |                                       |      |
| HER2-negative                                             | 27975                                | 37.7 | 20014                                 | 31.8 |
| HER2-positive                                             | 6182                                 | 8.3  | 4131                                  | 6.6  |
| HER2 unknown                                              | 40037                                | 54.0 | 38778                                 | 61.6 |
| <b>Original breast surgery</b>                            |                                      |      |                                       |      |
| Breast-conserving surgery                                 | 37412                                | 50.4 | 31849                                 | 50.6 |
| Mastectomy                                                | 33933                                | 45.7 | 29024                                 | 46.1 |
| Unknown                                                   | 2849                                 | 3.8  | 2050                                  | 3.3  |
| <b>Year of diagnosis</b>                                  |                                      |      |                                       |      |
| Before 1995                                               | 11199                                | 15.1 | 10404                                 | 16.5 |
| 1995-99                                                   | 18182                                | 24.5 | 21778                                 | 34.6 |
| 2000-04                                                   | 34864                                | 47.0 | 26189                                 | 41.6 |
| Since 2005                                                | 9949                                 | 13.4 | 4552                                  | 7.2  |
| <b>Endocrine therapy scheduled</b>                        |                                      |      |                                       |      |
| Tamoxifen only                                            | 47837                                | 64.5 | 41647                                 | 66.2 |
| Aromatase inhibitors (AI)                                 | 9563                                 | 12.9 | 6828                                  | 10.9 |
| Tamoxifen and AI                                          | 16434                                | 22.2 | 14169                                 | 22.5 |
| Toremifene only                                           | 360                                  | 0.5  | 279                                   | 0.4  |
| Ovarian ablation or suppression<br>in premenopausal women | 1771                                 | 2.4  | 1363                                  | 2.2  |
| <b>Chemotherapy scheduled?</b>                            |                                      |      |                                       |      |
| Yes                                                       | 47247                                | 63.7 | 33080                                 | 52.6 |
| No                                                        | 26947                                | 36.3 | 29843                                 | 47.4 |



**Table S2: A) Numbers with chemotherapy scheduled, by TN status and (if T1N0) grade**

**B) Numbers with trastuzumab scheduled, by trial design and HER2 status**

NB This study cannot assess reliably effects of chemotherapy or trastuzumab: see footnotes

| <b>A)</b>                      |                                     | <b>In year 0-5 analyses</b> |                                | <b>In year 5-20 analyses</b> |                                |
|--------------------------------|-------------------------------------|-----------------------------|--------------------------------|------------------------------|--------------------------------|
|                                |                                     | <b>Total</b>                | <b>Chemotherapy scheduled*</b> | <b>Total</b>                 | <b>Chemotherapy scheduled*</b> |
| <b>Nodal involvement</b>       | <b>N0</b>                           | 29,925                      | 12,176 (41%)                   | 28,847                       | 9,136 (32%)                    |
|                                | <b>N1-3</b>                         | 31,936                      | 24,467 (77%)                   | 25,292                       | 17,280 (68%)                   |
|                                | <b>N4-9</b>                         | 12,333                      | 10,604 (86%)                   | 8,784                        | 6,664 (76%)                    |
| <b>Diameter in mm, N0 only</b> | <b>≤10 (T1a/b)</b>                  | 5,602                       | 1,232 (22%)                    | 5,527                        | 910 (16%)                      |
|                                | <b>11-20 (T1c)</b>                  | 14,080                      | 5,337 (38%)                    | 13,875                       | 4,034 (29%)                    |
|                                | <b>21-30 (T2)</b>                   | 7,311                       | 3,837 (52%)                    | 6,700                        | 2,859 (43%)                    |
|                                | <b>31-50 (T2)</b>                   | 2,932                       | 1,770 (60%)                    | 2,745                        | 1,333 (49%)                    |
| <b>Tumor grade, T1N0 only</b>  | <b>Low</b>                          | 3,552                       | 517 (15%)                      | 3,524                        | 401 (11%)                      |
|                                | <b>Moderate</b>                     | 7,867                       | 2,492 (32%)                    | 7,363                        | 1,861 (25%)                    |
|                                | <b>High (poorly differentiated)</b> | 3,655                       | 1,903 (52%)                    | 3,054                        | 1,414 (46%)                    |

\* Much of this chemotherapy was not randomly allocated and many trials of chemotherapy vs not are absent, so chemotherapy effects cannot be assessed reliably from comparisons in this study.

| <b>B)</b>                                     |                      | <b>In year 0-5 analyses</b> |                               | <b>In year 5-20 analyses</b> |                               |
|-----------------------------------------------|----------------------|-----------------------------|-------------------------------|------------------------------|-------------------------------|
|                                               |                      | <b>Total</b>                | <b>Trastuzumab scheduled†</b> | <b>Total</b>                 | <b>Trastuzumab scheduled†</b> |
| <b>Trials with no scheduled trastuzumab</b>   | <b>HER2-negative</b> | 17,448                      | 0                             | 13,262                       | 0                             |
|                                               | <b>HER2-positive</b> | 3,200                       | 0                             | 2,156                        | 0                             |
|                                               | <b>HER2 unknown</b>  | 39,167                      | 0                             | 38,215                       | 0                             |
| <b>Trials with some scheduled trastuzumab</b> | <b>HER2-negative</b> | 10,527                      | 0                             | 6,752                        | 0                             |
|                                               | <b>HER2-positive</b> | 2,982                       | 1564 (52%)                    | 1,975                        | 993 (50%)                     |
|                                               | <b>HER2 unknown</b>  | 870                         | 0                             | 563                          | 0                             |

† Much of this trastuzumab was not randomly allocated and many trials of trastuzumab vs not are absent, so trastuzumab effects cannot be assessed reliably from comparisons in this study.

**Figure S1: Association of pathological nodal status (N0, N1-3 or N4-9) with risk from diagnosis to year 20 of distant recurrence for: A) T1 tumors, and B) T2 tumors.** 74,194 women with T1/T2 N0-9 ER+ disease entered at year 0 and scheduled 5 years of ET. Bars are 95% CIs. Dashed lines indicate that event rate is that for whole 5-year period.

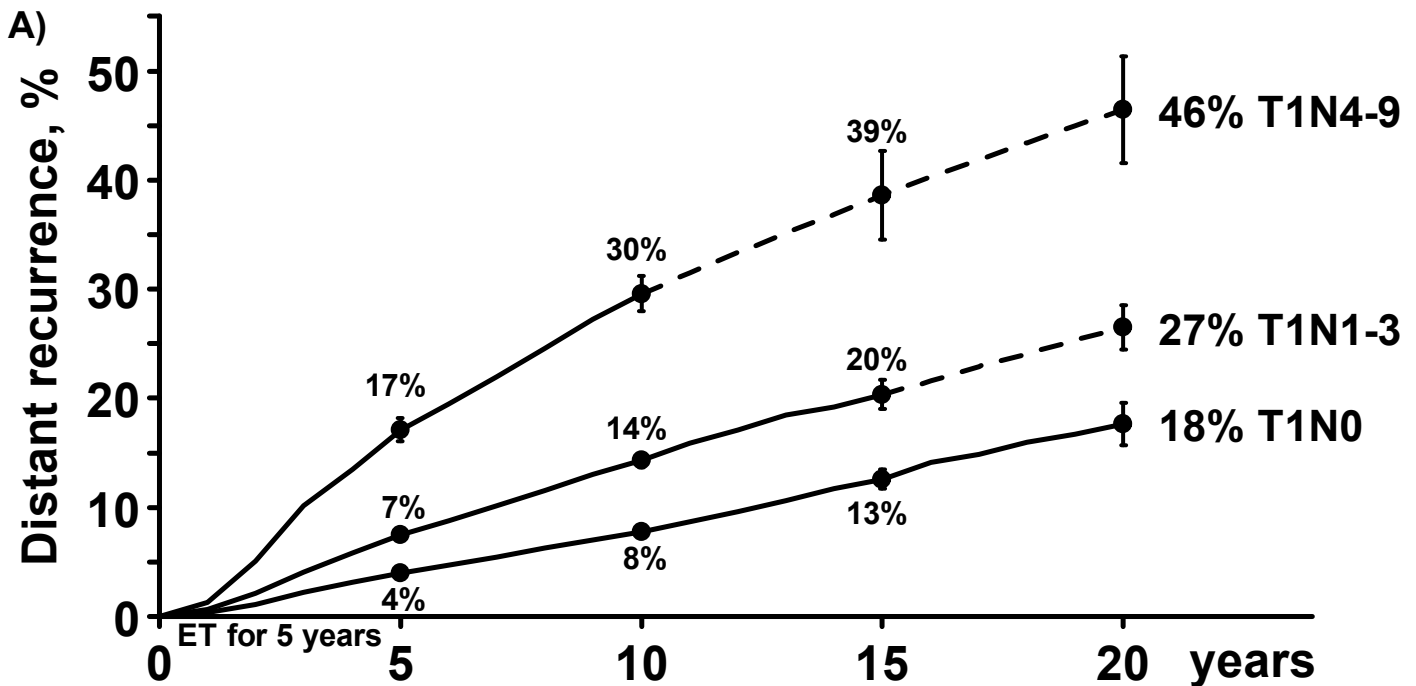

No. at risk (and, in each 5-year period, no. of events and annual rate)

|        |       |              |       |             |      |             |      |            |     |
|--------|-------|--------------|-------|-------------|------|-------------|------|------------|-----|
| T1N4-9 | 5033  | (818, 3.7%)  | 3517  | (340, 3.2%) | 956  | (47, 2.6%)  | 115  | (7, 2.9%)  | 18  |
| T1N1-3 | 17171 | (1203, 1.5%) | 13305 | (652, 1.5%) | 4282 | (130, 1.6%) | 552  | (20, 1.5%) | 102 |
| T1N0   | 19682 | (744, 0.8%)  | 16107 | (425, 0.8%) | 5701 | (153, 1.1%) | 1323 | (39, 1.3%) | 263 |

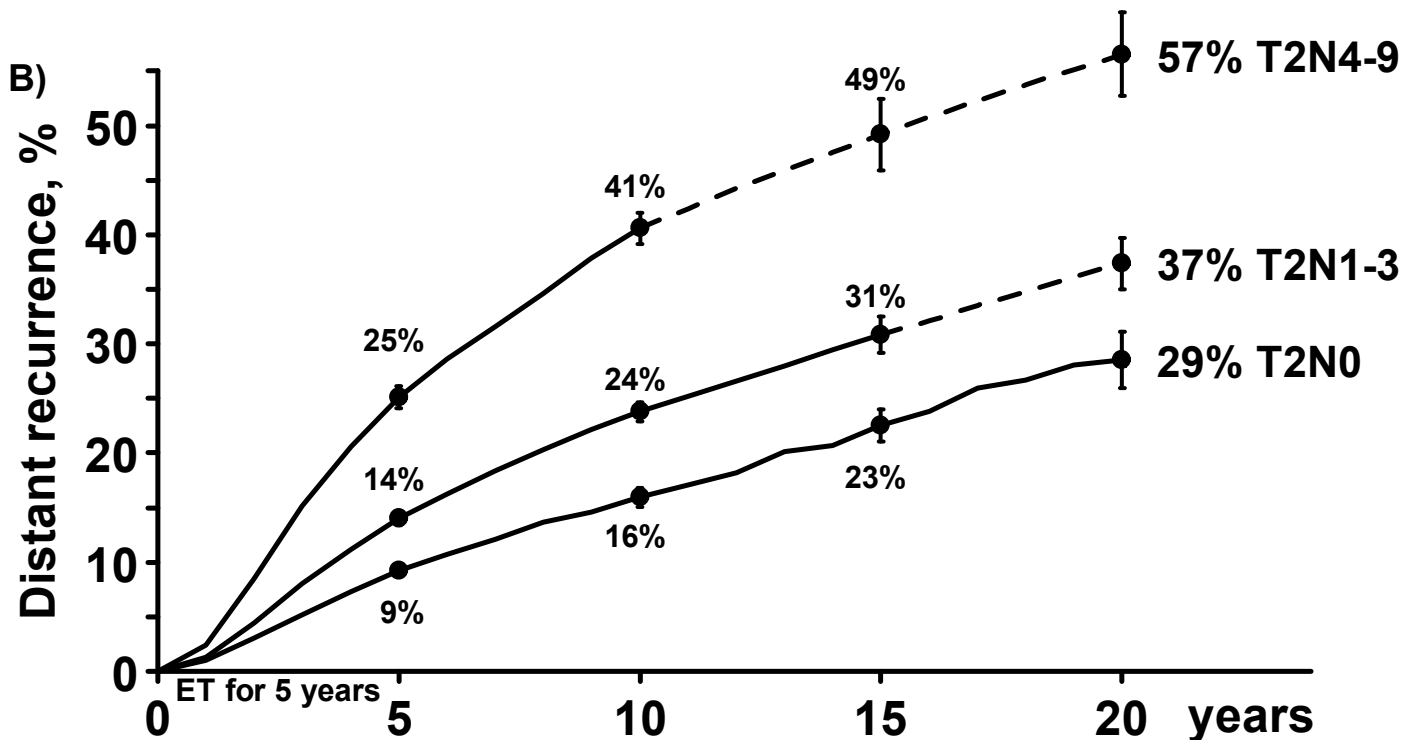

No. at risk (and, in each 5-year period, no. of events and annual rate)

|        |       |              |       |             |      |             |     |            |     |
|--------|-------|--------------|-------|-------------|------|-------------|-----|------------|-----|
| T2N4-9 | 7300  | (1750, 5.7%) | 4599  | (629, 4.6%) | 1209 | (74, 3.5%)  | 144 | (6, 1.7%)  | 34  |
| T2N1-3 | 14765 | (1923, 3.0%) | 10271 | (769, 2.5%) | 2968 | (111, 1.9%) | 397 | (19, 2.1%) | 81  |
| T2N0   | 10243 | (902, 1.9%)  | 7974  | (410, 1.6%) | 2870 | (119, 1.6%) | 659 | (29, 1.7%) | 151 |

**Figure S2: Association of pathological nodal status with risk in years 5-20 of distant recurrence for: A) T1 tumors, and B) T2 tumors.** 62,923 women with ER+ disease scheduled 5 years of ET and event-free and being followed at year 5. Bars are 95% CIs. Dashed lines indicate that event rate is that for whole 5-year period. ET: endocrine therapy; T1 or T2: diameter 1-20 or 21-50 mm; N: no. involved nodes.

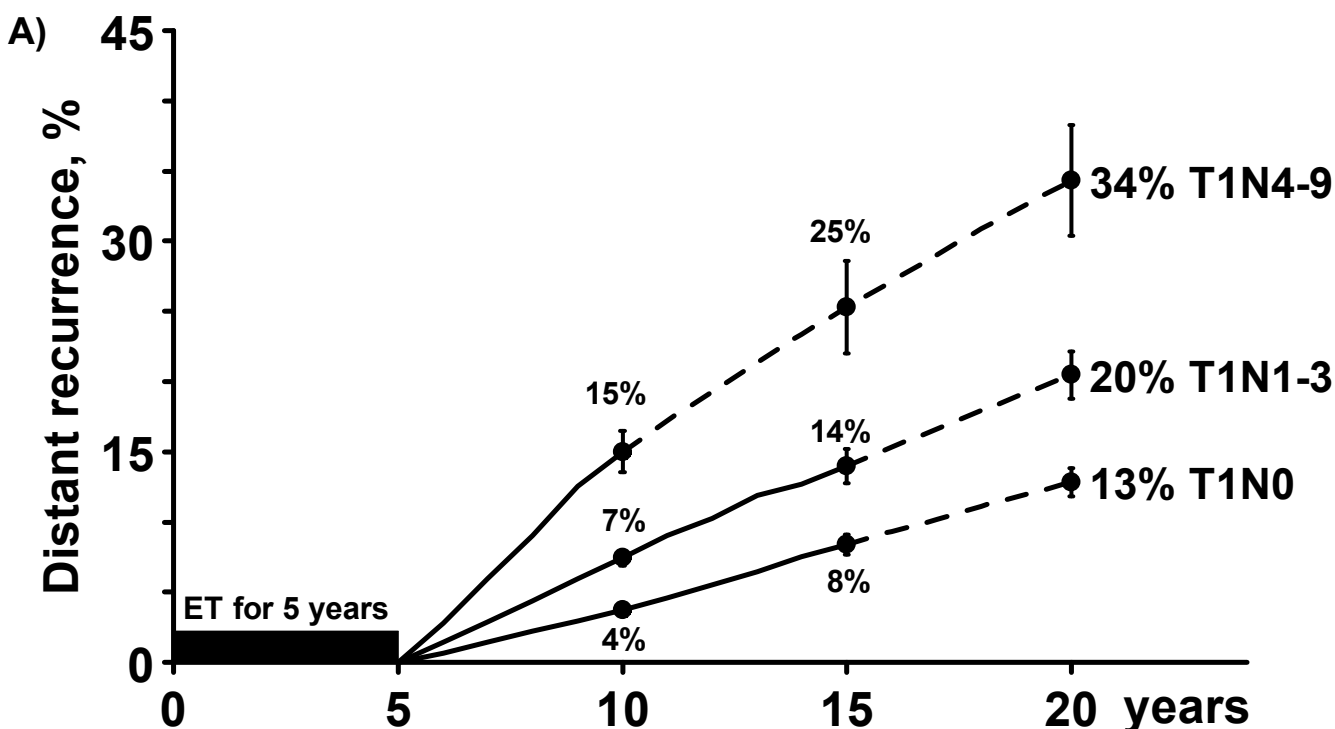

No. at risk (and, in each 5-year period, no. of events and annual rate)

|        |                   |                  |                 |     |
|--------|-------------------|------------------|-----------------|-----|
| T1N4-9 | 3832 (391, 3.2%)  | 1193 (68, 2.6%)  | 214 (11, 2.2%)  | 32  |
| T1N1-3 | 14342 (734, 1.5%) | 5138 (162, 1.5%) | 817 (35, 1.7%)  | 154 |
| T1N0   | 19402 (509, 0.8%) | 8020 (218, 1.0%) | 2345 (58, 1.0%) | 440 |

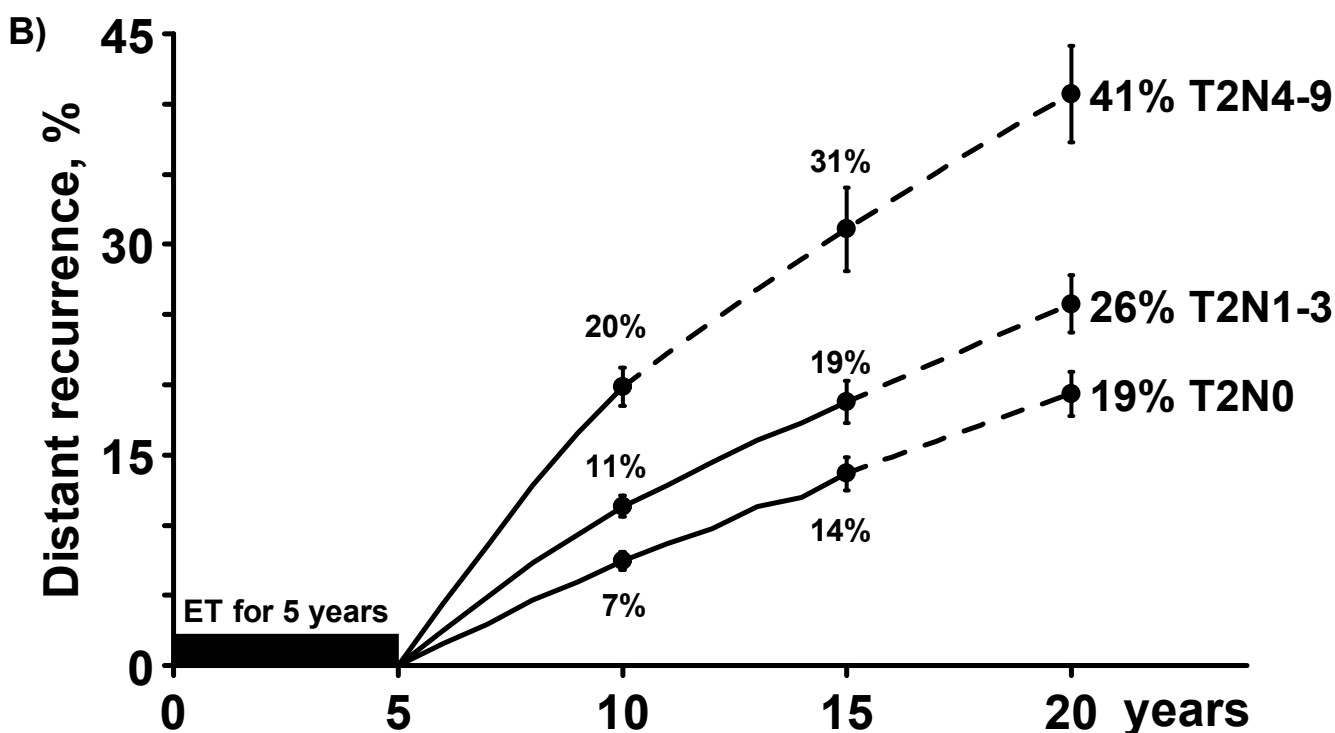

No. at risk (and, in each 5-year period, no. of events and annual rate)

|        |                   |                  |                 |     |
|--------|-------------------|------------------|-----------------|-----|
| T2N4-9 | 4952 (688, 4.5%)  | 1517 (106, 3.3%) | 285 (12, 1.7%)  | 51  |
| T2N1-3 | 10950 (842, 2.4%) | 3551 (134, 1.8%) | 614 (28, 1.9%)  | 114 |
| T2N0   | 9445 (512, 1.6%)  | 3901 (152, 1.4%) | 1129 (37, 1.3%) | 218 |

**Figure S3: Association of tumor diameter (T1a/b, T1c, and T2) in N0 disease with risk in years 5-20 of distant recurrence.** 28,847 women with N0 ER+ disease scheduled 5 years of ET and event-free and being followed at year 5. Bars are 95% CIs. Dashed lines indicate that event rate is that for whole 5-year period. ET: endocrine therapy; T1a/b, T1c, or T2: tumor diameter 1-10, 11-20, or 21-50 mm; N0: node-negative.

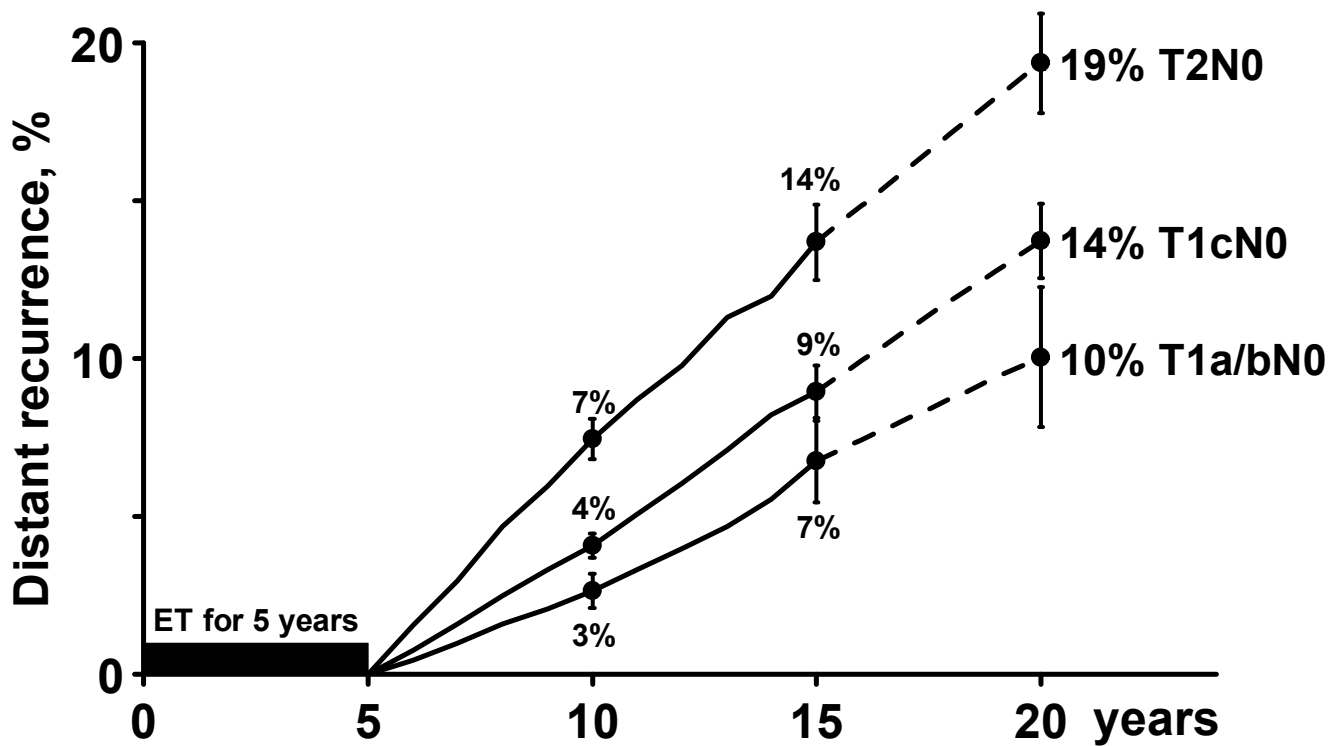

No. at risk (and, in each 5-year period, no. of events and annual rate)

|         |       |             |      |             |      |            |     |
|---------|-------|-------------|------|-------------|------|------------|-----|
| T2N0    | 9445  | (512, 1.6%) | 3901 | (152, 1.4%) | 1129 | (37, 1.3%) | 218 |
| T1cN0   | 13875 | (413, 0.8%) | 5967 | (171, 1.1%) | 1641 | (46, 1.2%) | 309 |
| T1a/bN0 | 5527  | (96, 0.5%)  | 2053 | (47, 0.8%)  | 704  | (12, 0.7%) | 131 |

**Figure S4: Association of tumor grade in T1N0 disease with risk in years 5-20 of distant recurrence.** 13,941 women with grade known and T1N0 ER+ disease scheduled 5 years of ET and event-free and followed at year 5. Bars are 95% CIs. Dashed lines indicate that event rate is that for whole 5-year period. ET: endocrine therapy

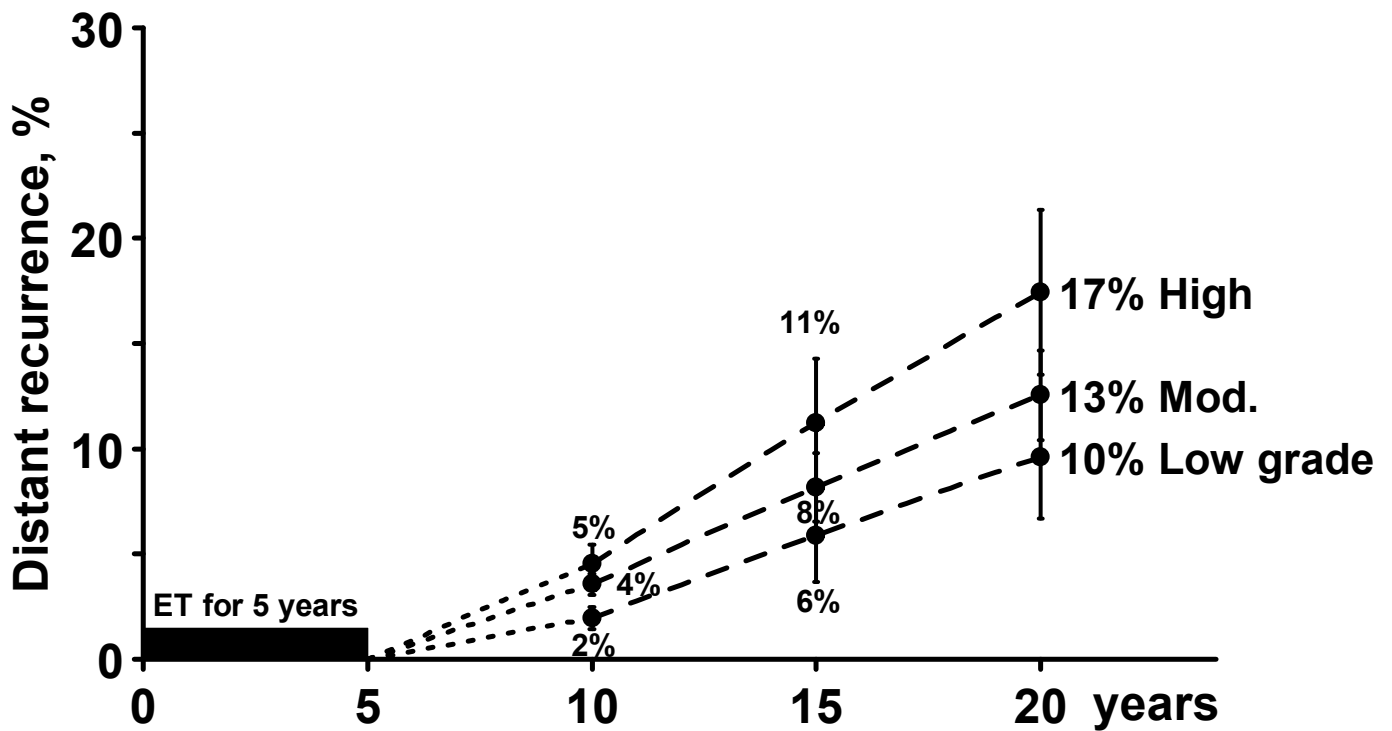

No. at risk (and, in each 5-year period, no. of events and annual rate)

|           |      |             |      |            |     |           |   |
|-----------|------|-------------|------|------------|-----|-----------|---|
| High      | 3054 | (92, 0.9%)  | 1010 | (32, 1.3%) | 188 | (6, 2.6%) | 2 |
| Mod.      | 7363 | (186, 0.7%) | 2761 | (60, 1.0%) | 474 | (6, 1.1%) | 6 |
| Low grade | 3524 | (49, 0.4%)  | 1258 | (23, 0.8%) | 239 | (2, 0.6%) | 6 |

**Figure S5: Independent associations of various factors with rate ratio of distant recurrence (RR) during the 5 years of endocrine therapy and after it.** 74,194 women entered at year 0 (plus some later); total 62,923 event-free and followed at year 5. Bars (and text) give 95% group-specific CIs. All RRs are stratified by treatment group. TN analyses have RR=1 for T2N0; others adjust for TN status, scaling RRs so that mean RR=1.

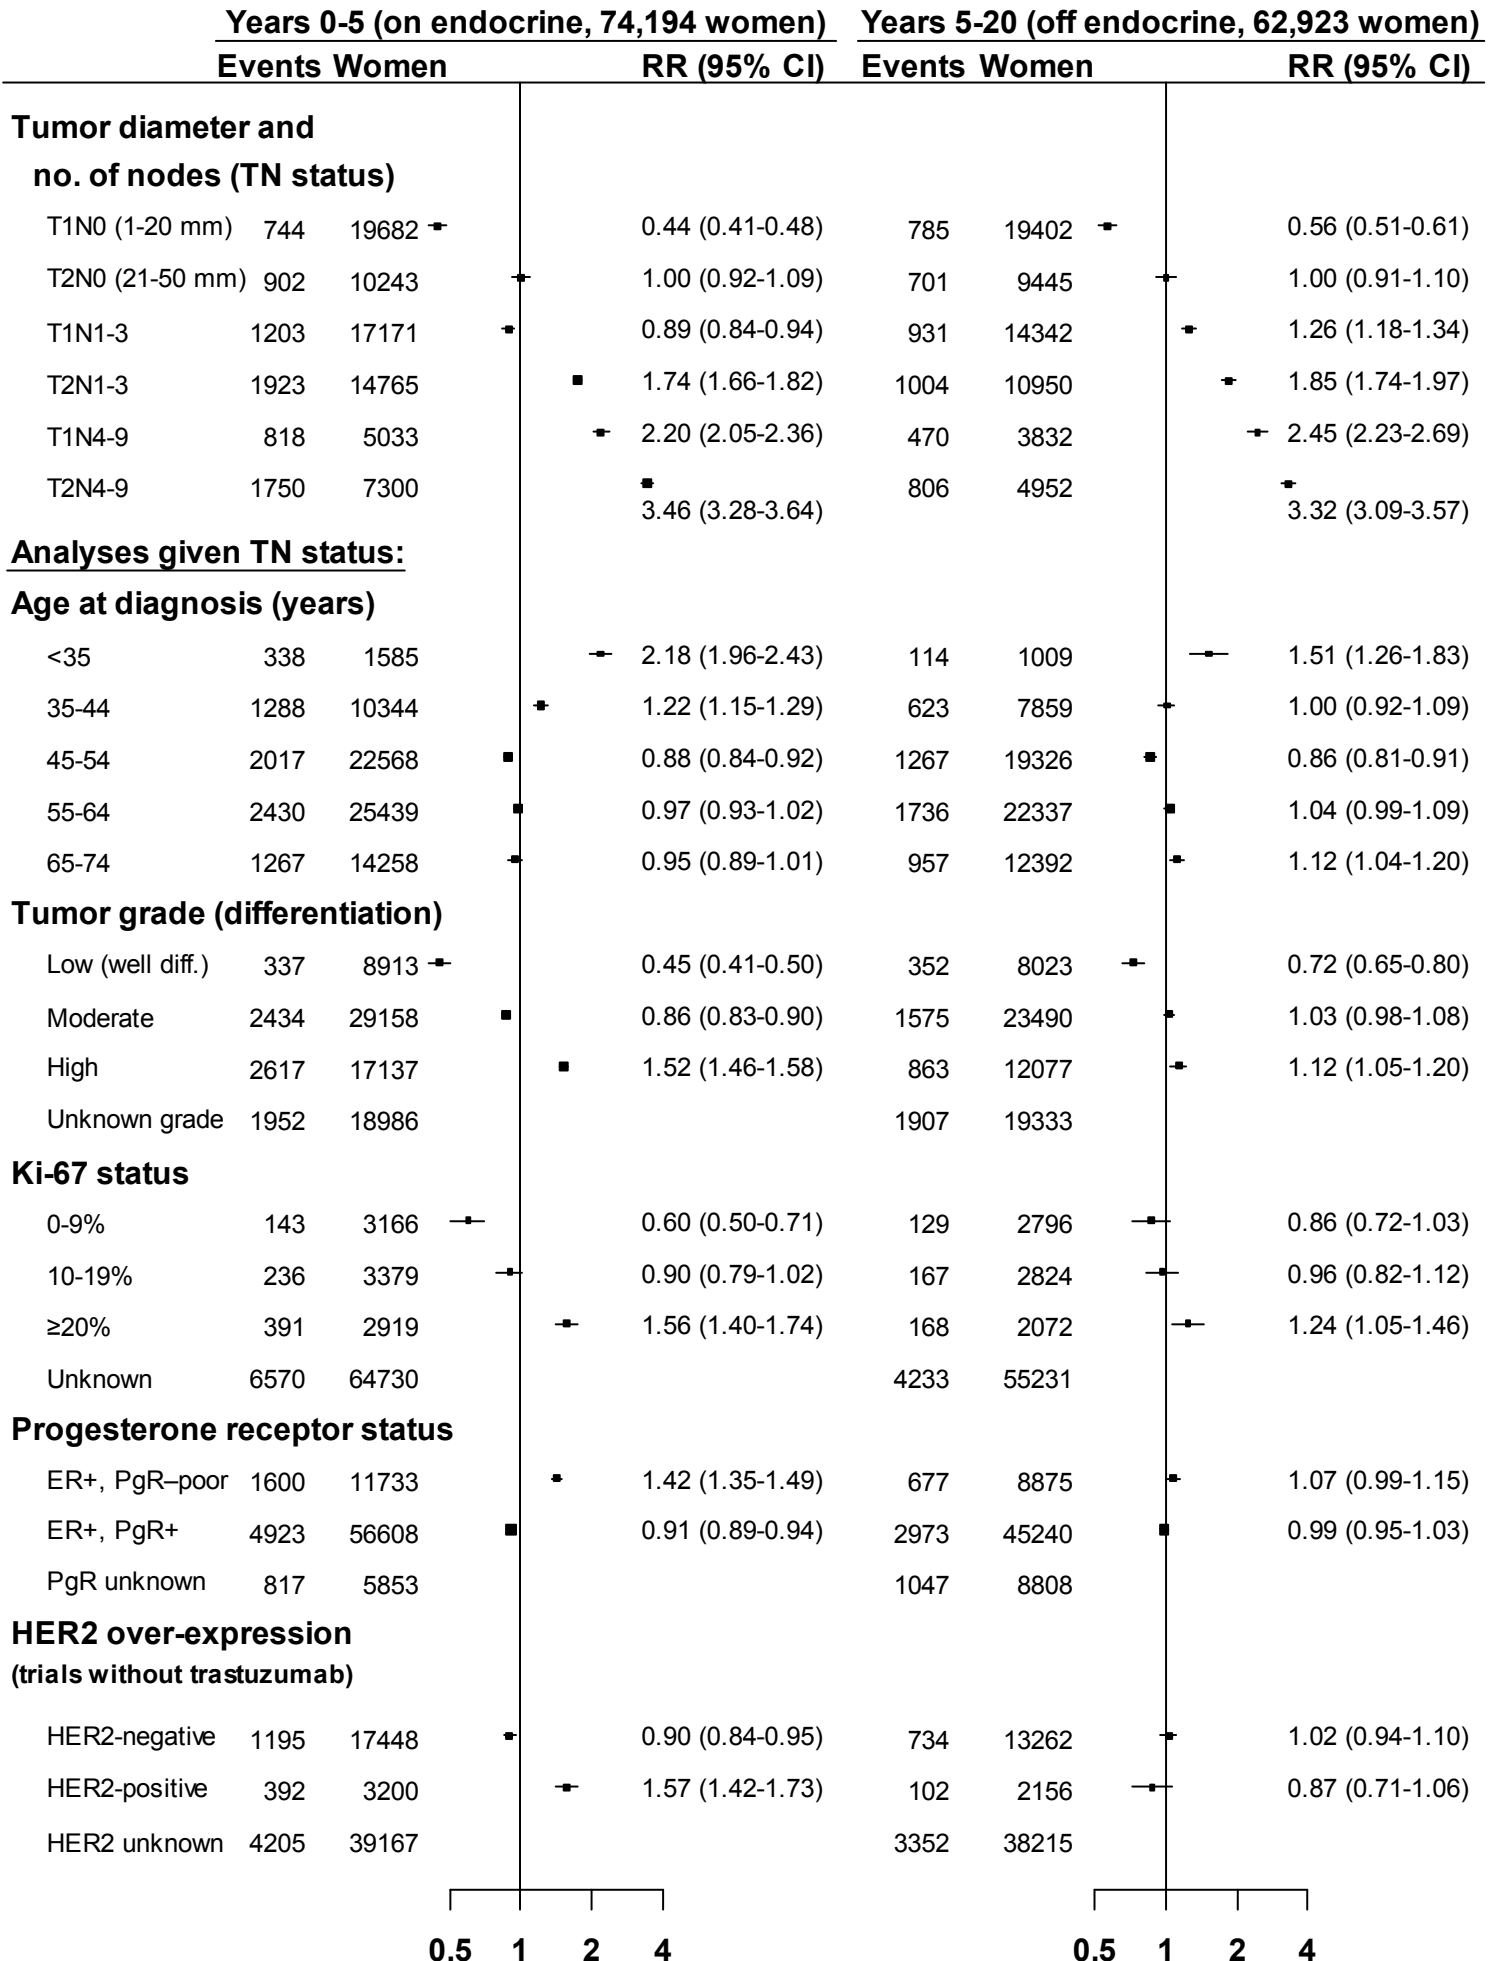

**Figure S6: Association of pathological nodal status (N0, N1-3 or N4-9) with risk from diagnosis to year 20 of any breast cancer event (distant or local recurrence or contralateral onset) for: A) T1 tumors, and B) T2 tumors.** 74,194 women with T1/T2 N0-9 ER+ disease entered at year 0 and scheduled 5 years of ET. Bars are 95% CIs. Dashed lines indicate that event rate is that for whole 5-year period.

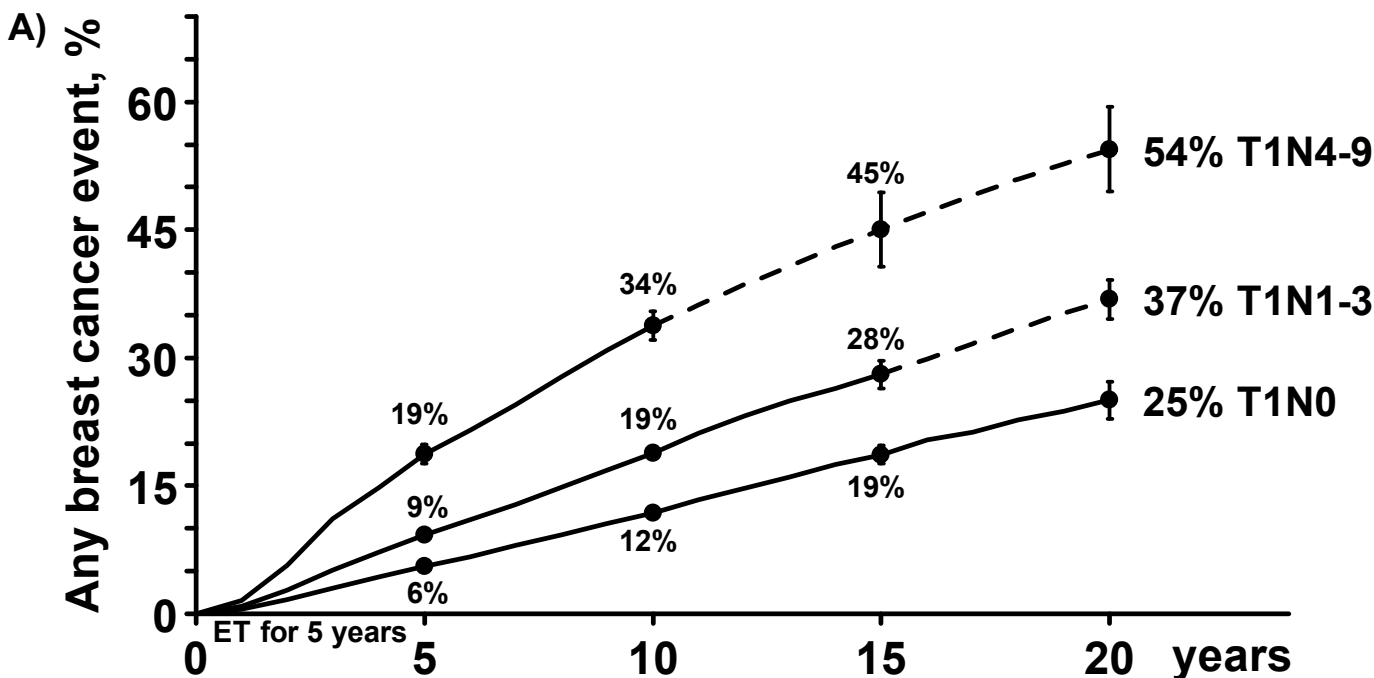

No. at risk (and, in each 5-year period, no. of events and annual rate)

|        |       |              |       |             |      |             |      |            |     |
|--------|-------|--------------|-------|-------------|------|-------------|------|------------|-----|
| T1N4-9 | 5033  | (898, 4.1%)  | 3461  | (409, 4.0%) | 905  | (62, 3.7%)  | 111  | (8, 3.4%)  | 18  |
| T1N1-3 | 17171 | (1502, 1.9%) | 13070 | (904, 2.2%) | 4087 | (195, 2.6%) | 497  | (29, 2.5%) | 88  |
| T1N0   | 19682 | (1038, 1.1%) | 15883 | (708, 1.4%) | 5519 | (222, 1.6%) | 1253 | (49, 1.7%) | 246 |

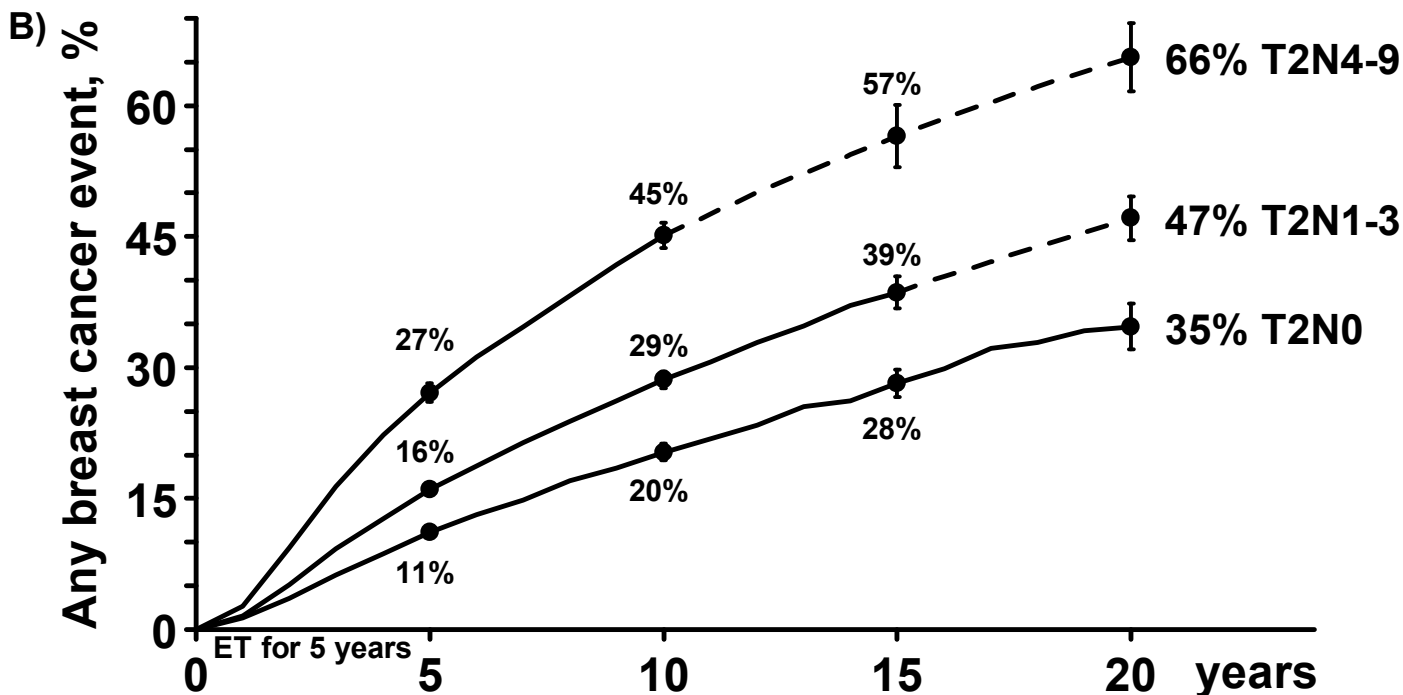

No. at risk (and, in each 5-year period, no. of events and annual rate)

|        |       |              |       |             |      |             |     |            |     |
|--------|-------|--------------|-------|-------------|------|-------------|-----|------------|-----|
| T2N4-9 | 7300  | (1894, 6.2%) | 4491  | (732, 5.6%) | 1122 | (95, 4.9%)  | 127 | (12, 4.0%) | 26  |
| T2N1-3 | 14765 | (2206, 3.4%) | 10068 | (979, 3.3%) | 2829 | (164, 3.1%) | 364 | (20, 2.4%) | 77  |
| T2N0   | 10243 | (1092, 2.3%) | 7817  | (554, 2.2%) | 2768 | (149, 2.1%) | 629 | (34, 2.1%) | 147 |

**Figure S7: Association of pathological nodal status with risk in years 5-20 of any breast cancer event for: A) T1 tumors, and B) T2 tumors.** 62,923 women with ER+ disease scheduled 5 years of ET and event-free and being followed at year 5. Bars are 95% CIs. Dashed lines indicate that event rate is that for whole 5-year period. ET: endocrine therapy; T1 or T2: diameter 1-20 or 21-50 mm; N: no. involved nodes.

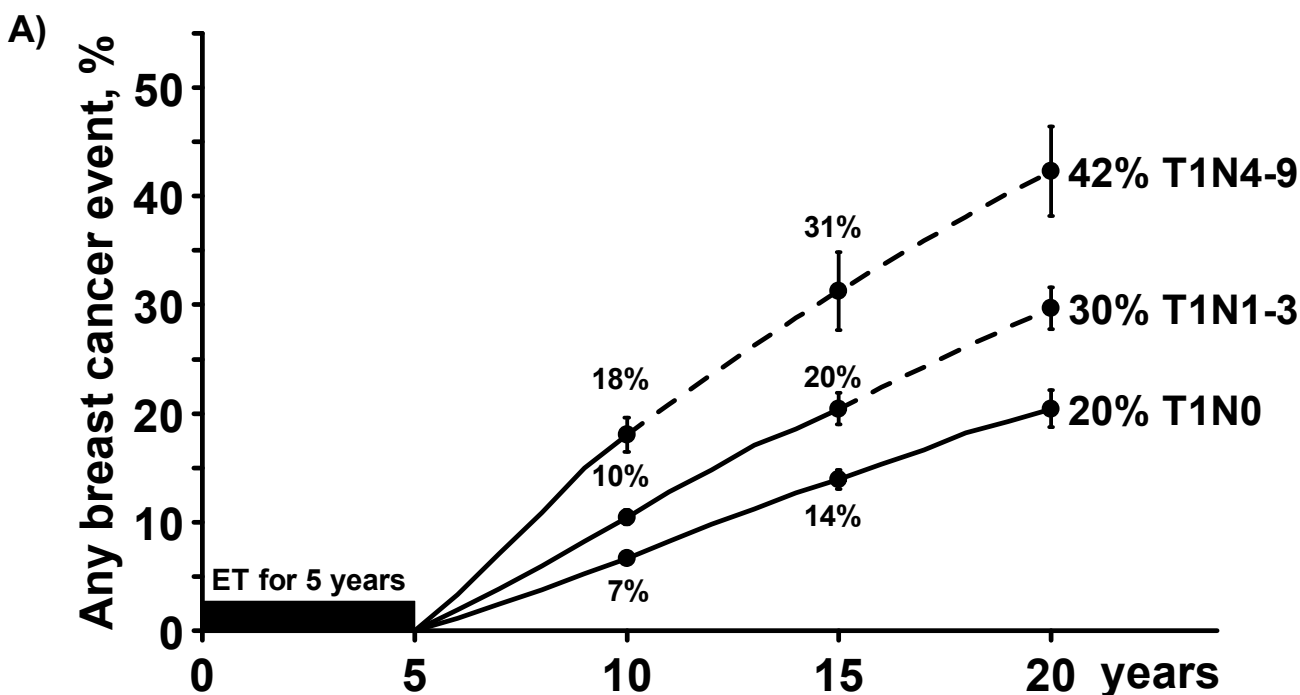

No. at risk (and, in each 5-year period, no. of events and annual rate)

|        |                    |                  |                 |     |
|--------|--------------------|------------------|-----------------|-----|
| T1N4-9 | 3832 (470, 3.9%)   | 1158 (86, 3.4%)  | 208 (18, 3.8%)  | 30  |
| T1N1-3 | 14342 (1023, 2.2%) | 4995 (247, 2.4%) | 761 (49, 2.6%)  | 137 |
| T1N0   | 19402 (910, 1.4%)  | 7834 (350, 1.6%) | 2228 (84, 1.6%) | 413 |

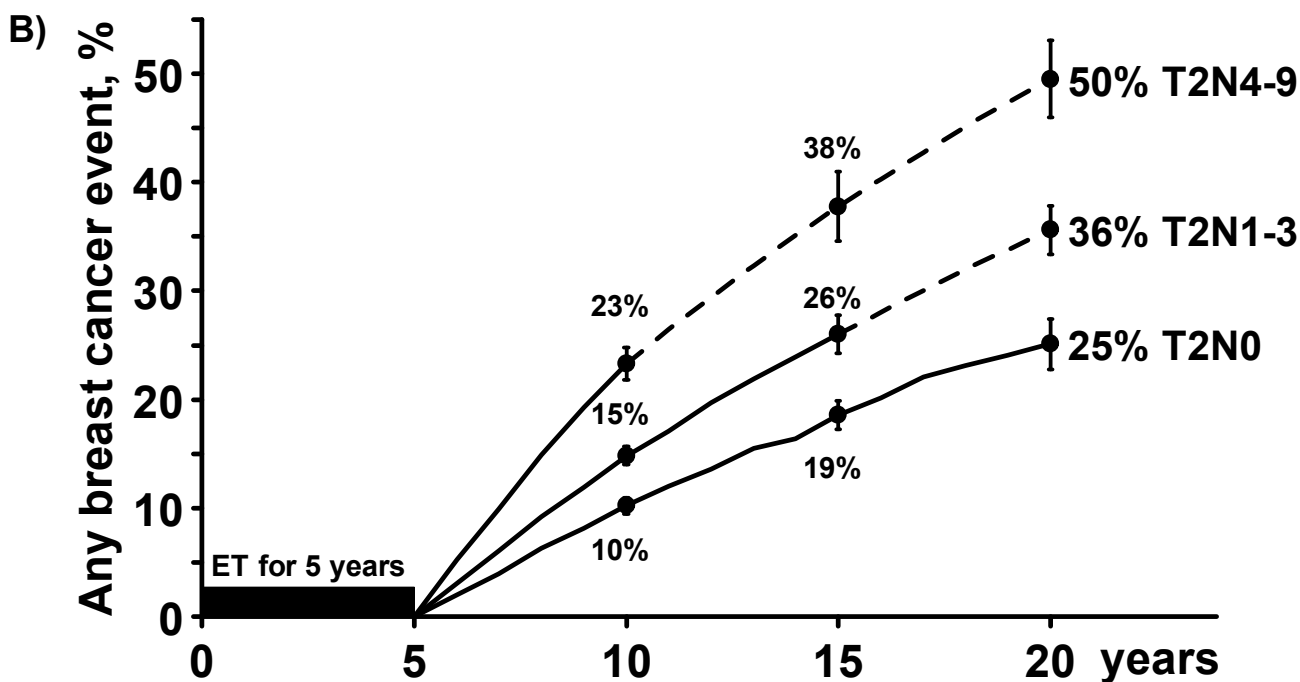

No. at risk (and, in each 5-year period, no. of events and annual rate)

|        |                    |                  |                 |     |
|--------|--------------------|------------------|-----------------|-----|
| T2N4-9 | 4952 (804, 5.3%)   | 1459 (134, 4.4%) | 266 (21, 3.4%)  | 44  |
| T2N1-3 | 10950 (1089, 3.2%) | 3438 (204, 2.8%) | 566 (32, 2.4%)  | 107 |
| T2N0   | 9445 (700, 2.2%)   | 3816 (208, 1.9%) | 1079 (49, 1.8%) | 208 |



**Figure S8: Association of tumor diameter (T1a/b, T1c, and T2) in N0 disease with risk in years 5-20 of any breast cancer event.** 28,847 women with N0 ER+ disease scheduled 5 years of ET and event-free and being followed at year 5. Bars are 95% CIs. Dashed lines indicate that event rate is that for whole 5-year period. ET: endocrine therapy; T1a/b, T1c, or T2: tumor diameter 1-10, 11-20, or 21-50 mm; N0: node-negative.

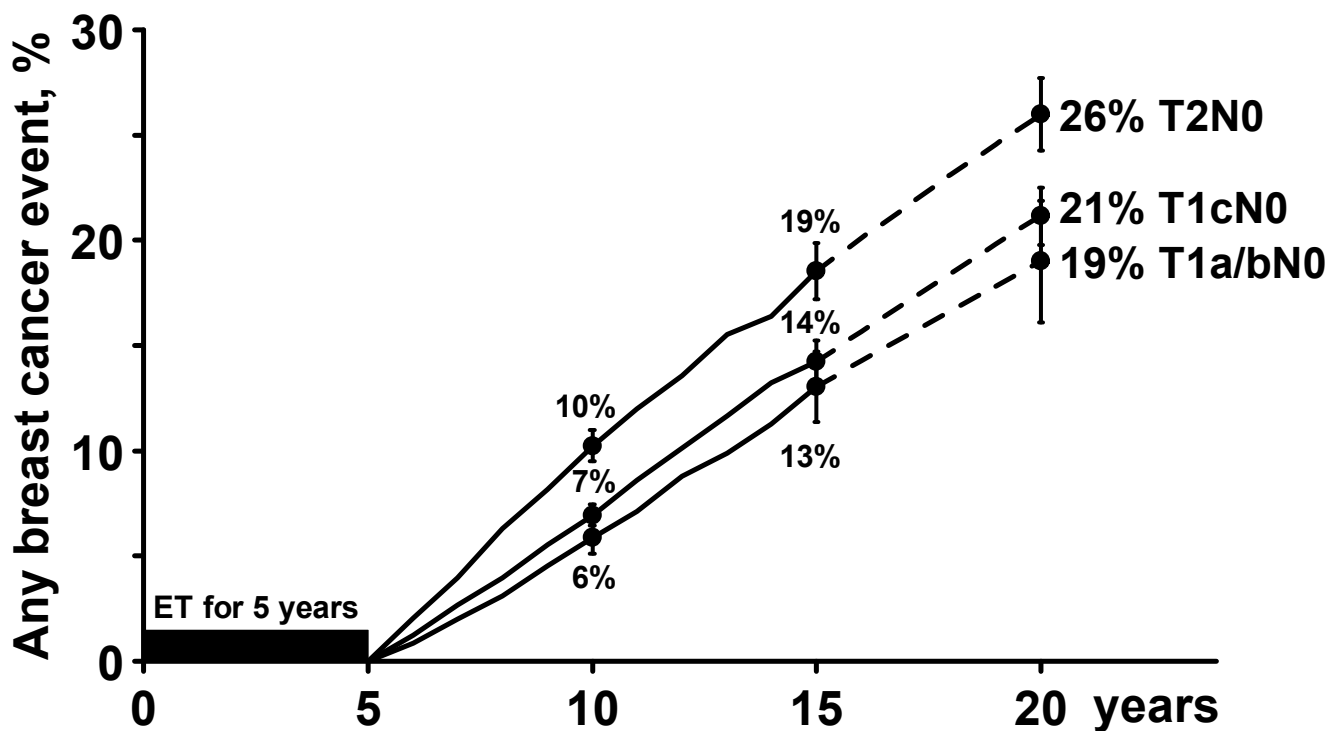

No. at risk (and, in each 5-year period, no. of events and annual rate)

|         |       |             |      |             |      |            |     |
|---------|-------|-------------|------|-------------|------|------------|-----|
| T2N0    | 9445  | (700, 2.2%) | 3816 | (208, 1.9%) | 1079 | (49, 1.8%) | 208 |
| T1cN0   | 13875 | (700, 1.4%) | 5832 | (264, 1.7%) | 1569 | (62, 1.7%) | 294 |
| T1a/bN0 | 5527  | (210, 1.2%) | 2002 | (86, 1.5%)  | 659  | (22, 1.4%) | 119 |

**Figure S9: Association of tumor grade in T1N0 disease with risk in years 5-20 of any breast cancer event.** 13,941 women with grade known and T1N0 ER+ disease scheduled 5 years of ET and event-free and being followed at year 5. Bars are 95% CIs. Dashed lines indicate that event rate is that for whole 5-year period. ET: endocrine therapy

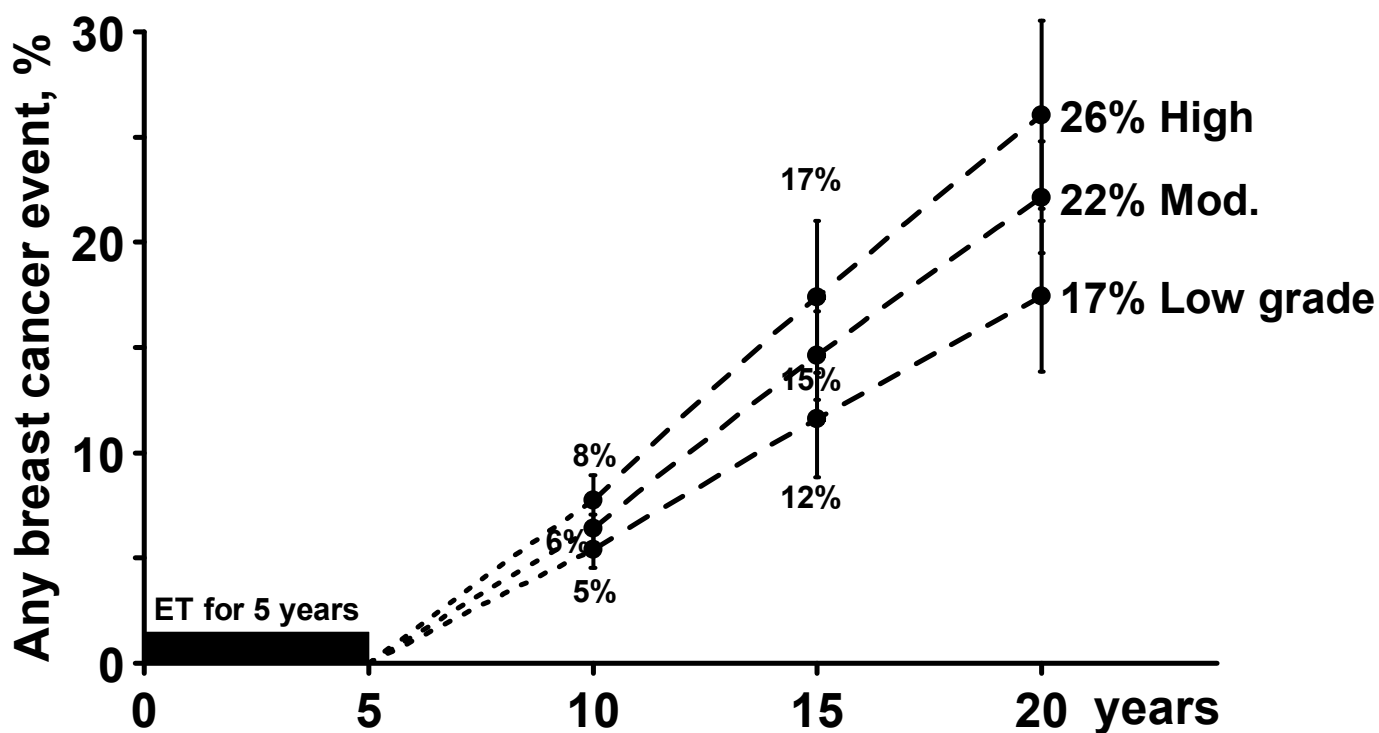

No. at risk (and, in each 5-year period, no. of events and annual rate)

|           |      |             |      |             |     |            |   |
|-----------|------|-------------|------|-------------|-----|------------|---|
| High      | 3054 | (158, 1.6%) | 987  | (49, 2.1%)  | 174 | (6, 3.0%)  | 0 |
| Mod.      | 7363 | (337, 1.3%) | 2693 | (108, 1.8%) | 449 | (11, 2.1%) | 6 |
| Low grade | 3524 | (136, 1.1%) | 1224 | (36, 1.4%)  | 227 | (4, 1.4%)  | 6 |

**Figure S10: Independent associations of various factors with rate ratio of any breast cancer event (RR) during the 5 years of endocrine therapy and after it.** 74,194 women entered at year 0 (plus some later); total 62,923 event-free and followed at year 5. Bars (and text) give 95% group-specific CIs. All RRs are stratified by treatment group. TN analyses have RR=1 for T2N0; others adjust for TN status, scaling RRs so that mean RR=1.

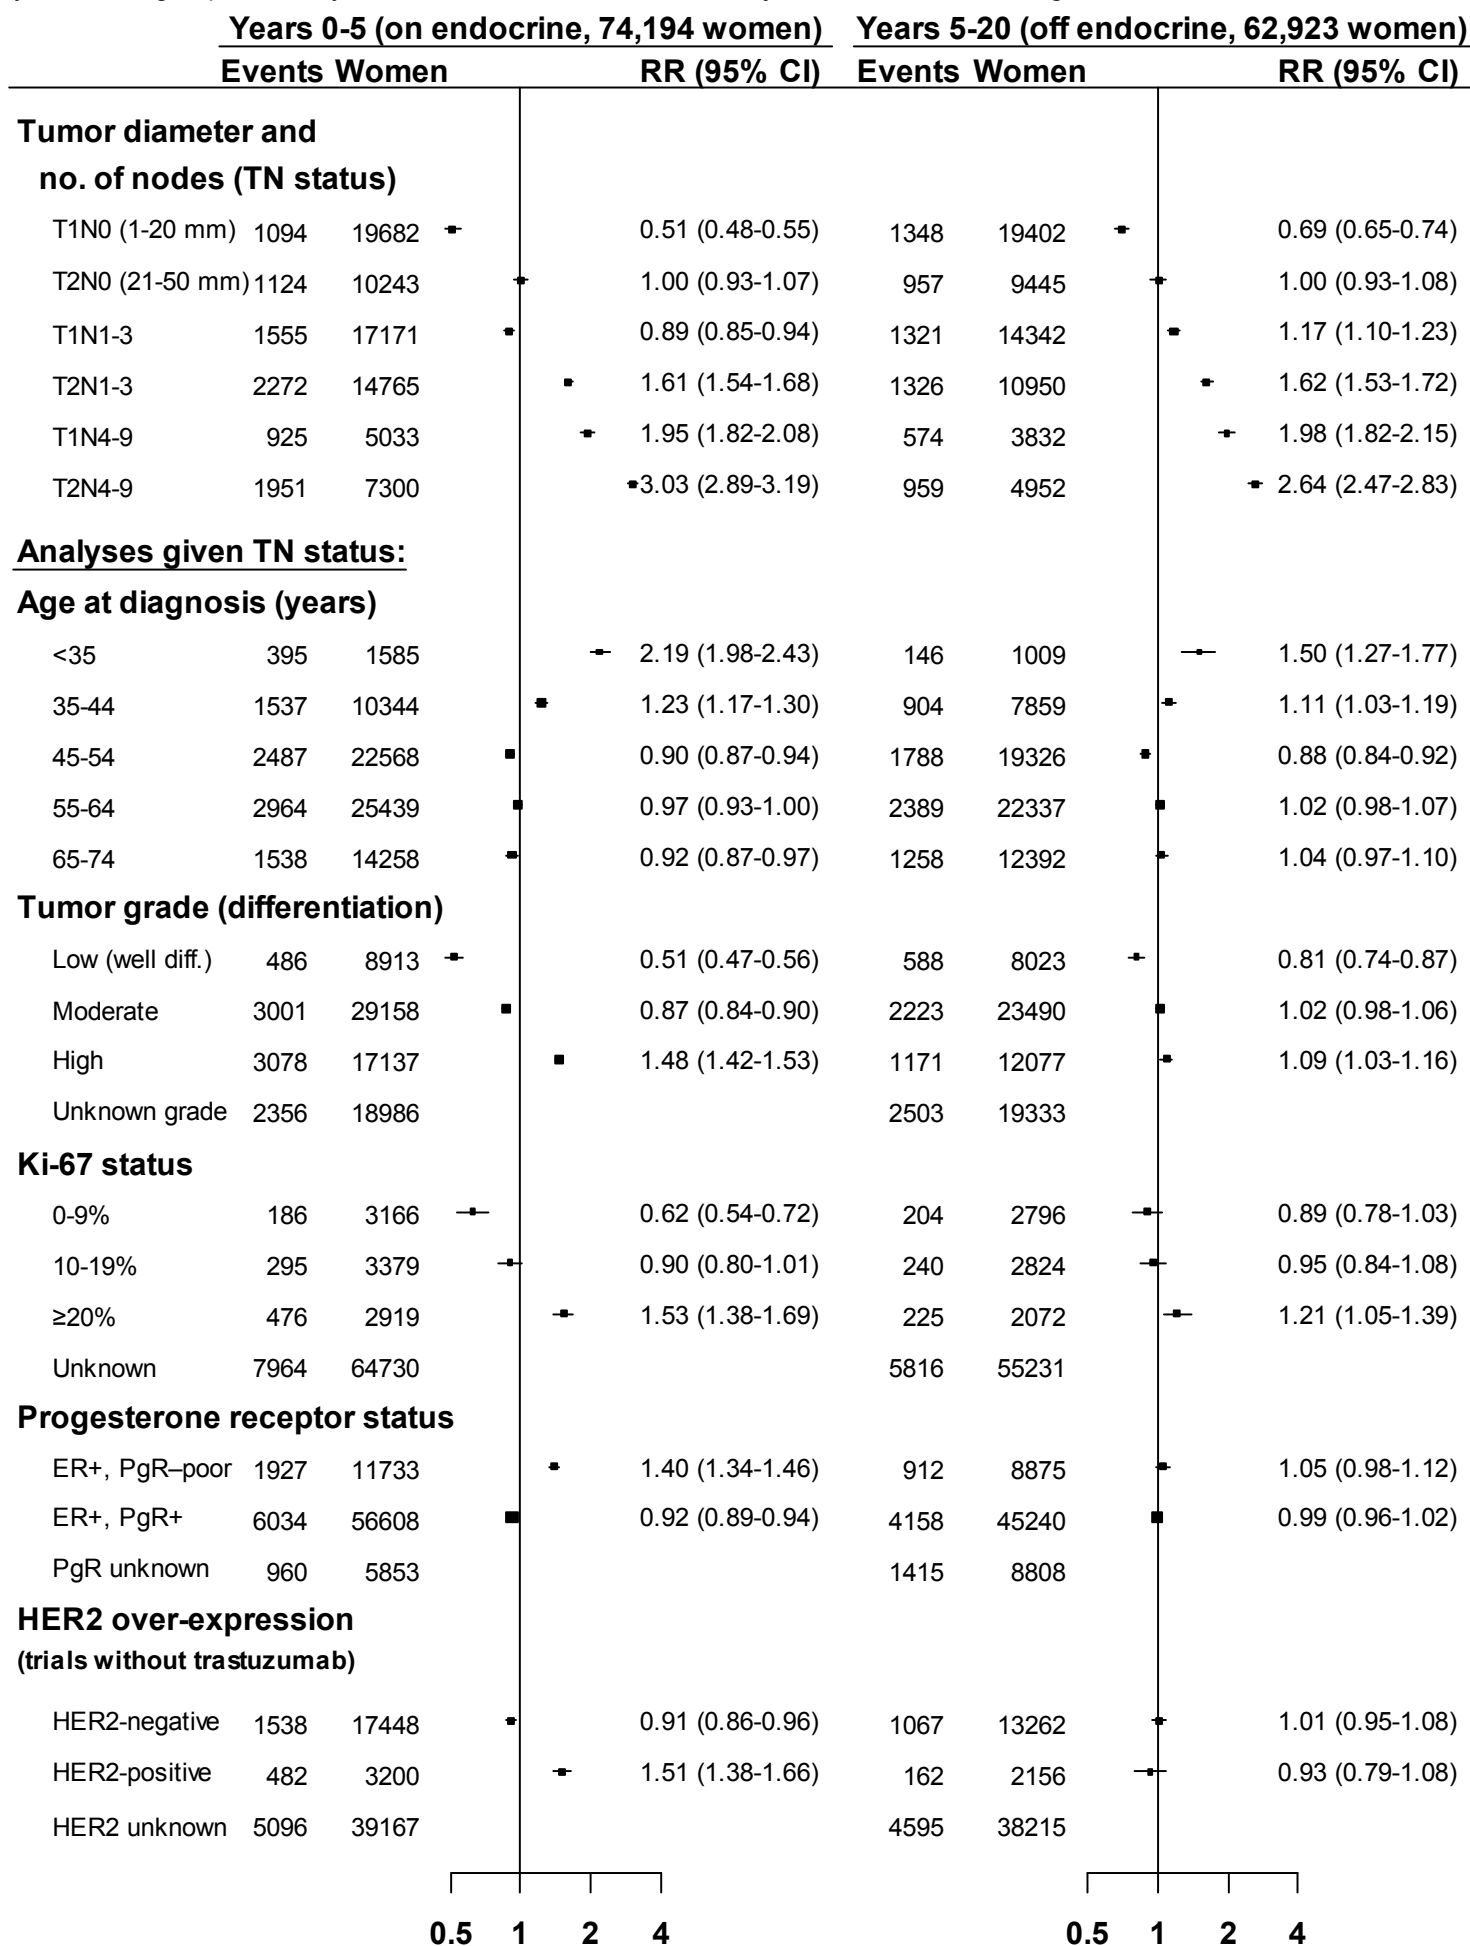

**Figure S11: Risk from diagnosis to year 20 of contralateral breast cancer.**

74,194 women with T1/T2 N0-9 ER+ disease entered at year 0 and scheduled 5 years of ET. Bars are 95% CIs.

Dashed lines indicate that event rate is that for whole 5-year period.

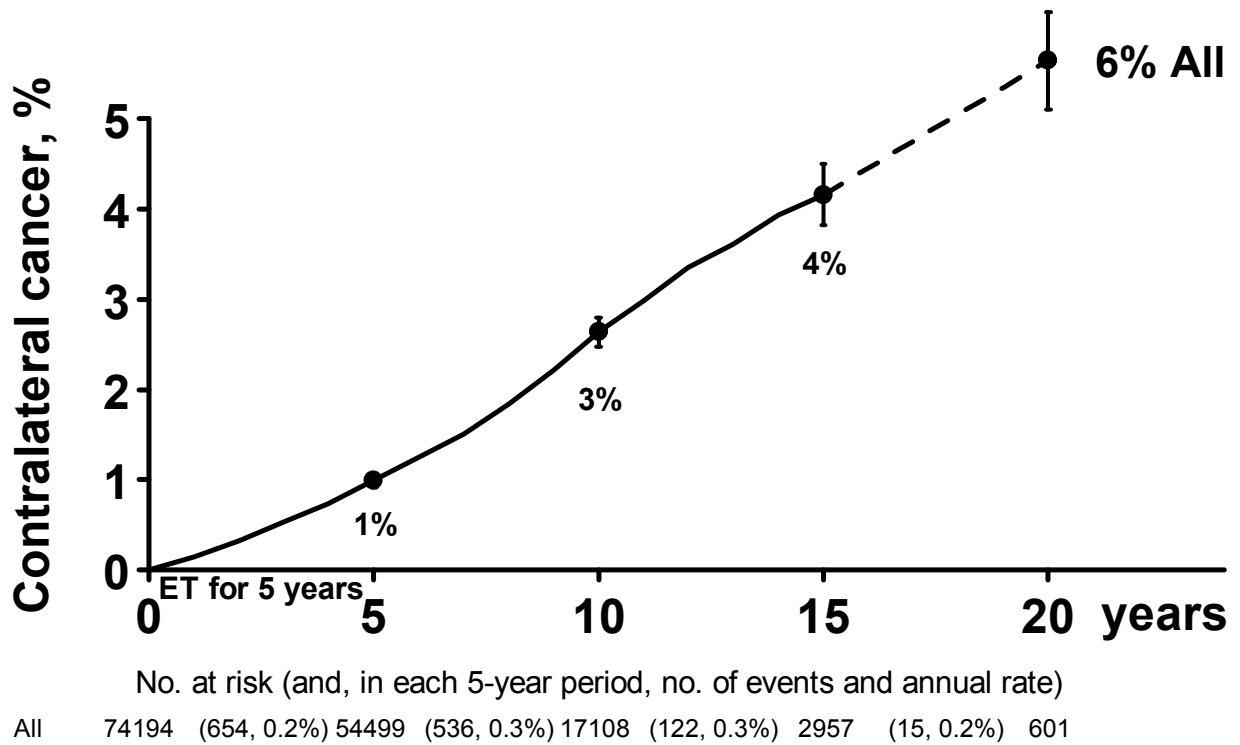

**Figure S12: Independent associations of various factors with rate ratio of contralateral breast cancer (RR) during the 5 years of endocrine therapy and after it.** 74,194 women entered at year 0 (plus some later); total 62,923 event-free and followed at year 5. Bars (and text) give 95% group-specific CIs. All RRs are stratified by treatment group. TN analyses have RR=1 for T2N0; others adjust for TN status, scaling RRs so that mean RR=1.

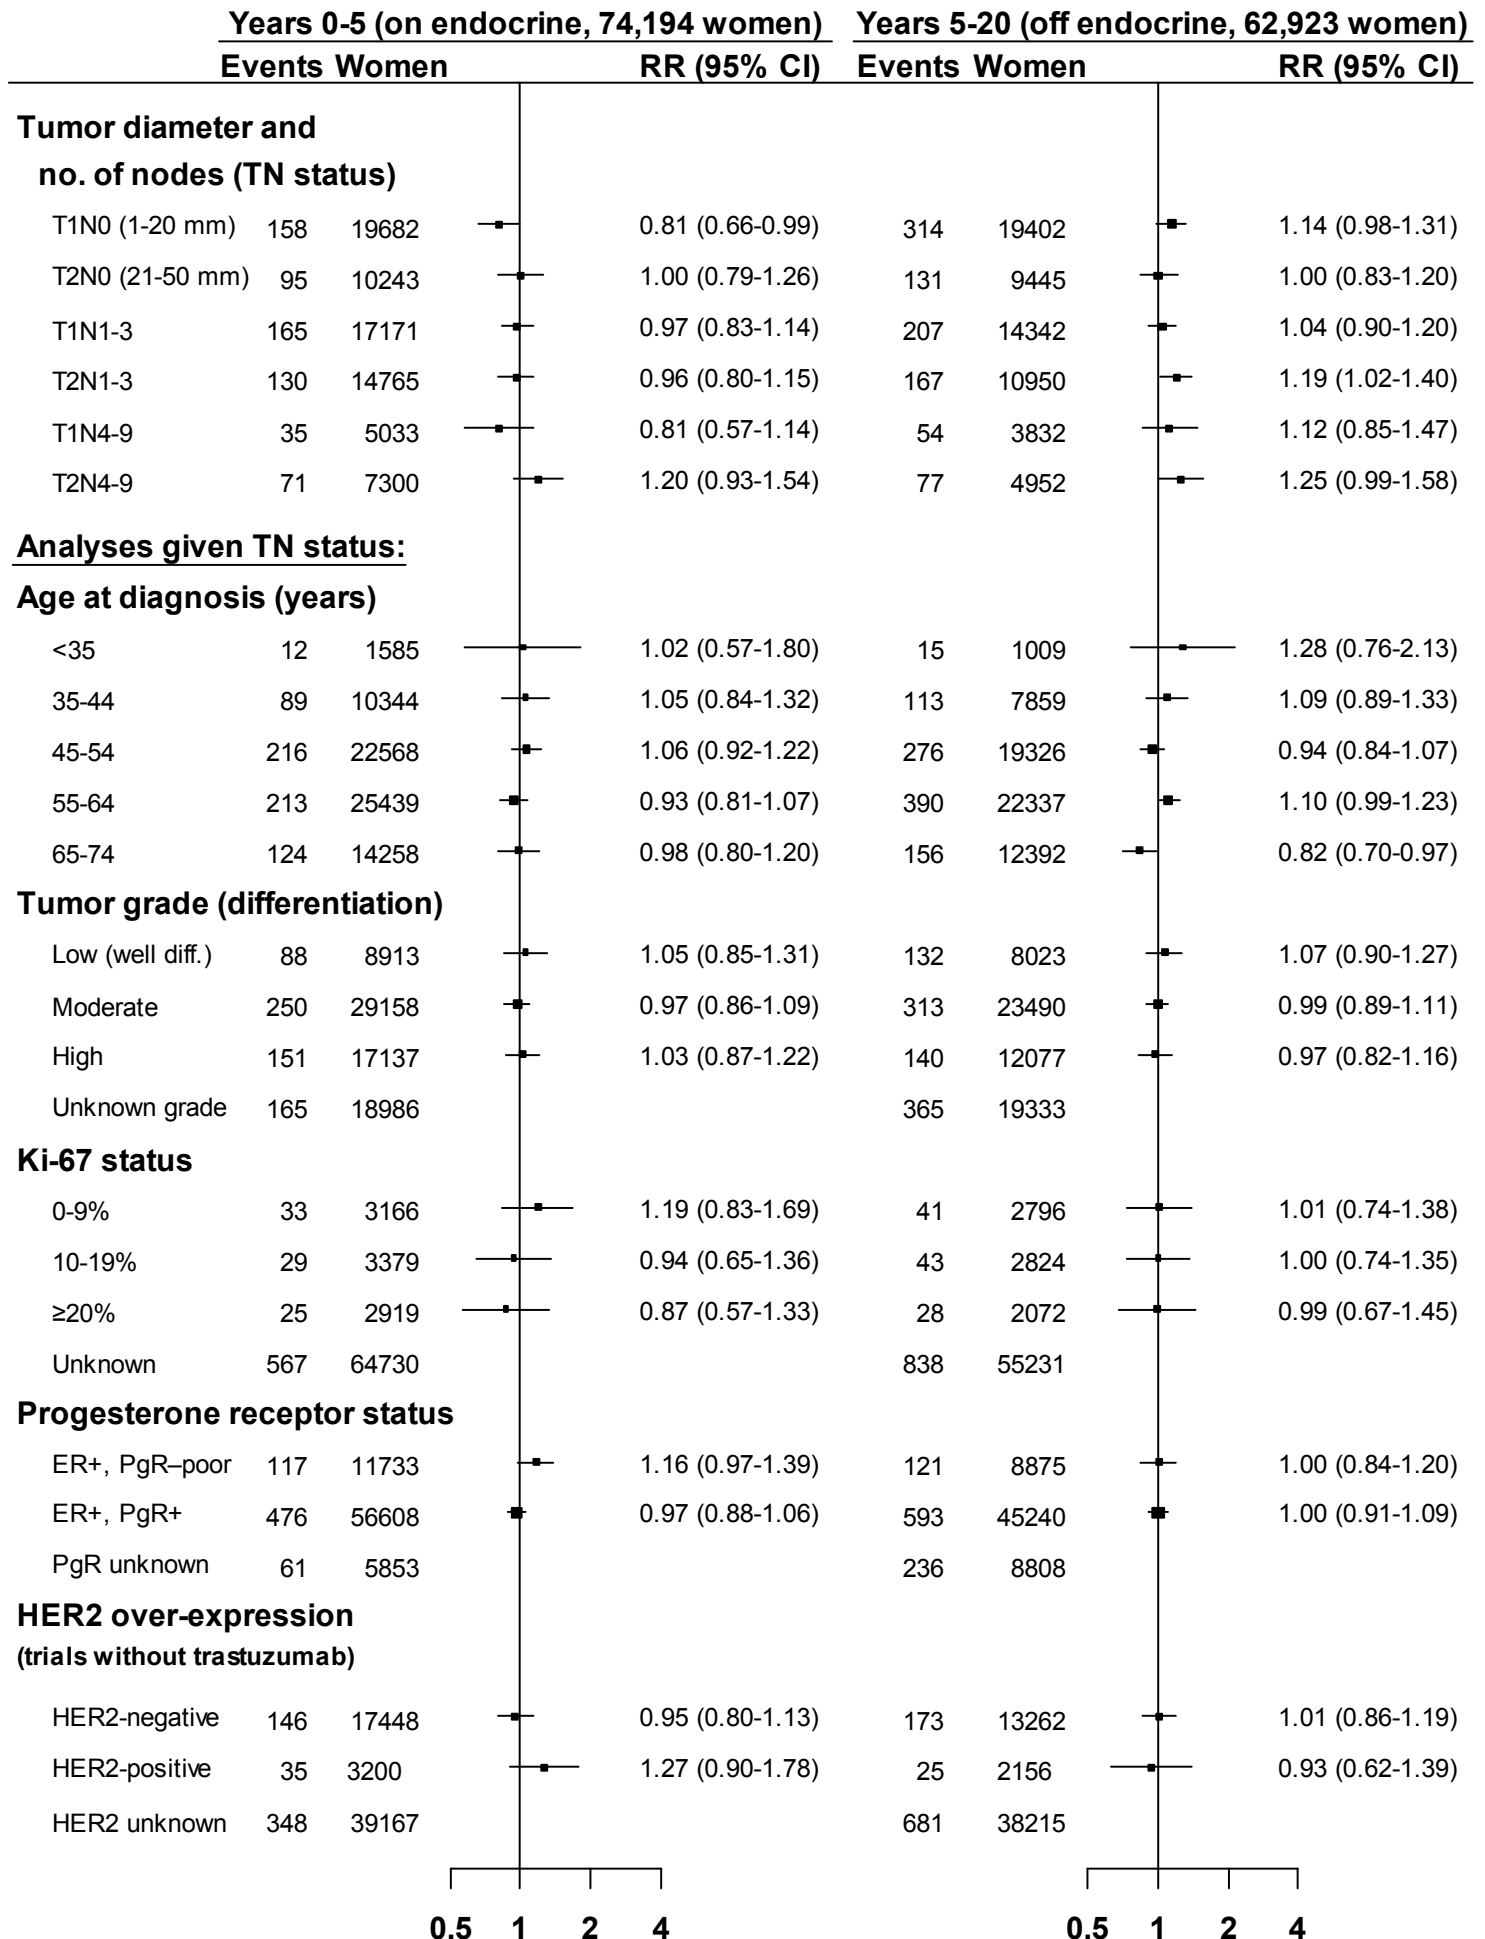

**Figure S13: Association of pathological nodal status (N0, N1-3 or N4-9) with risk from diagnosis to year 20 of breast cancer mortality for: A) T1 tumors, and B) T2 tumors.** 74,194 women with T1/T2 N0-9 ER+ disease entered at year 0 and scheduled 5 years of ET. Bars are 95% CIs. Dashed lines indicate that event rate is that for whole 5-year period. The breast cancer mortality rate in each separate time period is estimated by subtracting the mortality rate in women without recurrence from the rate in all women.

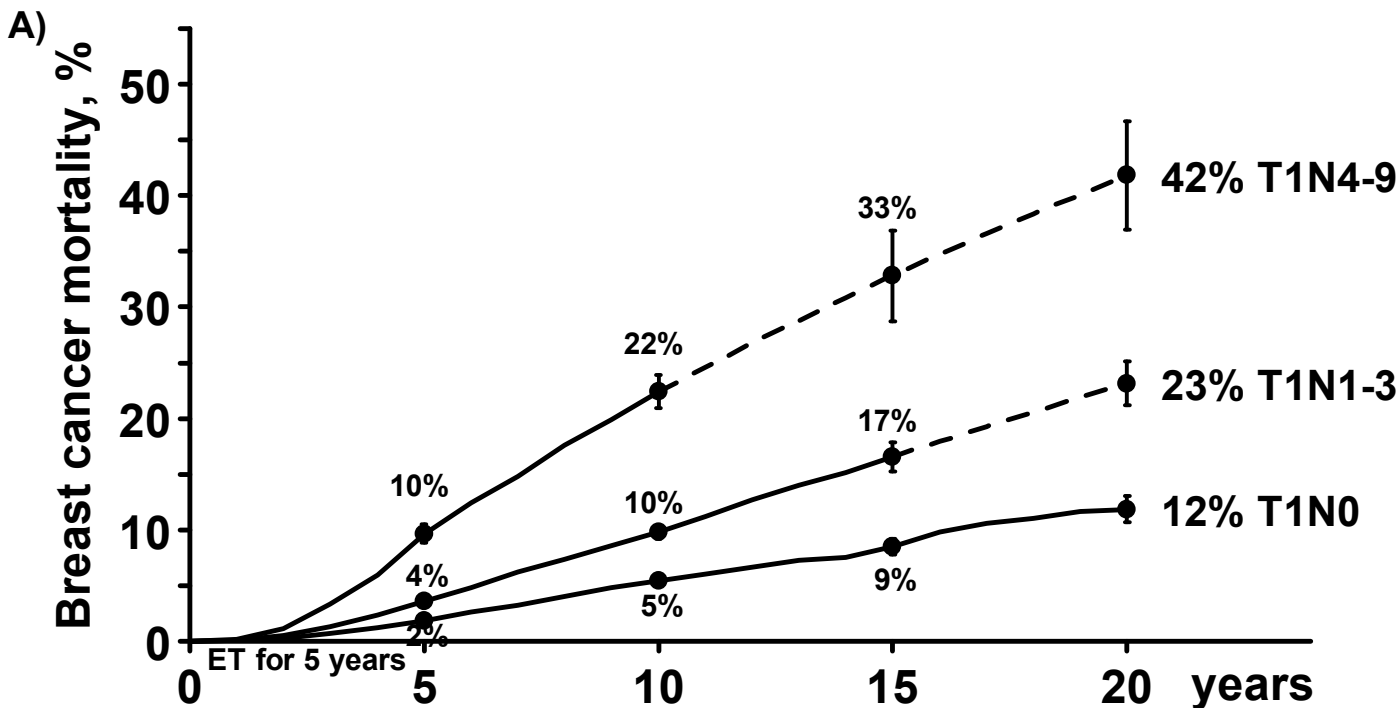

No. at risk (and, in each 5-year period, no. of events and annual rate)

|        |       |             |       |             |      |             |      |            |     |
|--------|-------|-------------|-------|-------------|------|-------------|------|------------|-----|
| T1N4-9 | 5033  | (460, 2.0%) | 3834  | (367, 3.0%) | 1082 | (67, 3.1%)  | 130  | (6, 1.6%)  | 22  |
| T1N1-3 | 17171 | (576, 0.7%) | 13839 | (621, 1.3%) | 4516 | (156, 1.6%) | 590  | (28, 1.5%) | 110 |
| T1N0   | 19682 | (354, 0.4%) | 16452 | (419, 0.7%) | 5890 | (120, 0.7%) | 1424 | (46, 0.9%) | 298 |

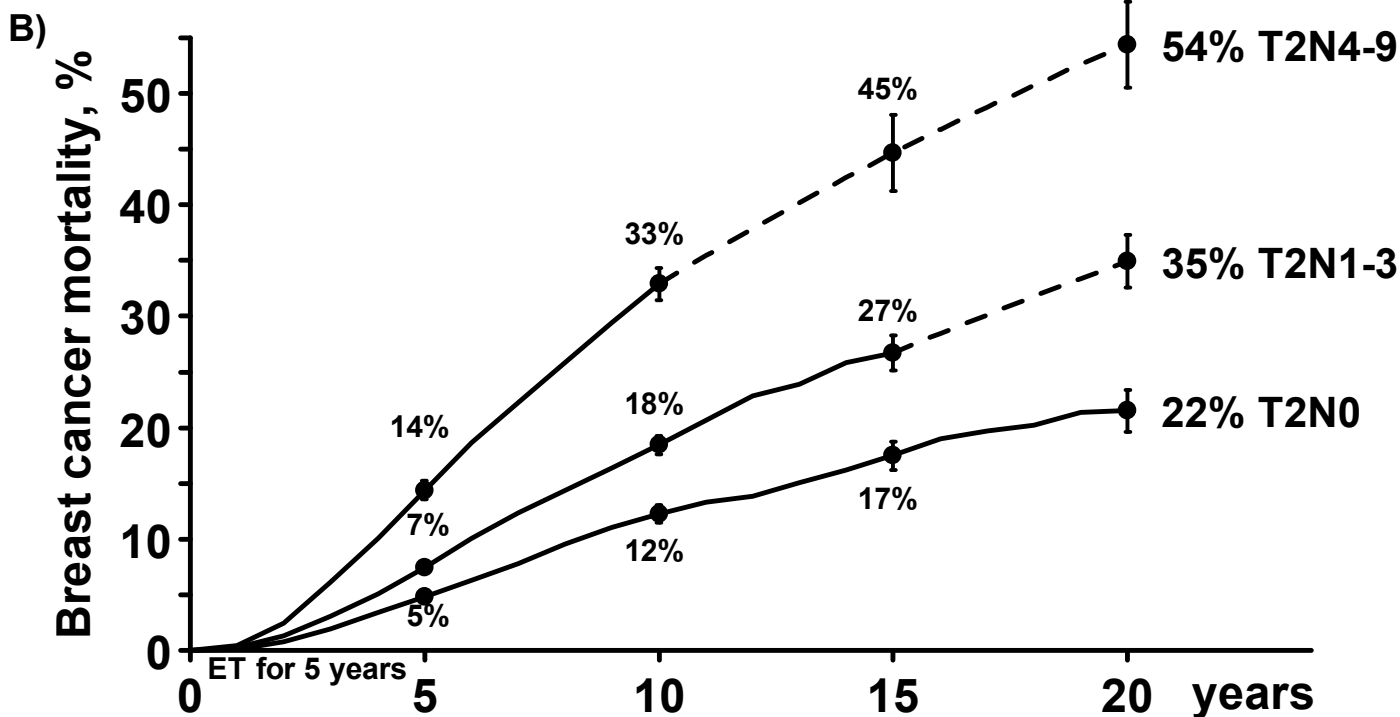

No. at risk (and, in each 5-year period, no. of events and annual rate)

|        |       |              |       |             |      |             |     |            |     |
|--------|-------|--------------|-------|-------------|------|-------------|-----|------------|-----|
| T2N4-9 | 7300  | (1003, 3.0%) | 5245  | (787, 4.9%) | 1399 | (118, 4.2%) | 164 | (14, 2.8%) | 35  |
| T2N1-3 | 14765 | (1024, 1.5%) | 11027 | (885, 2.6%) | 3212 | (163, 2.4%) | 421 | (24, 2.3%) | 87  |
| T2N0   | 10243 | (472, 1.0%)  | 8367  | (471, 1.6%) | 3036 | (108, 1.1%) | 720 | (31, 1.2%) | 178 |

**Figure S14: Association of pathological nodal status with risk in years 5-20 of breast cancer mortality for: A) T1 tumors, and B) T2 tumors.** 62,923 women with ER+ disease scheduled 5 years of ET and event-free and followed at year 5. Bars are 95% CIs. Dashed lines indicate that event rate is that for whole 5-year period. The breast cancer mortality rate in each separate time period is estimated by subtracting the mortality rate in women without recurrence from the rate in all women. ET: endocrine therapy; T1 or T2: diameter 1-20 or 21-50 mm; N: no. involved nodes.

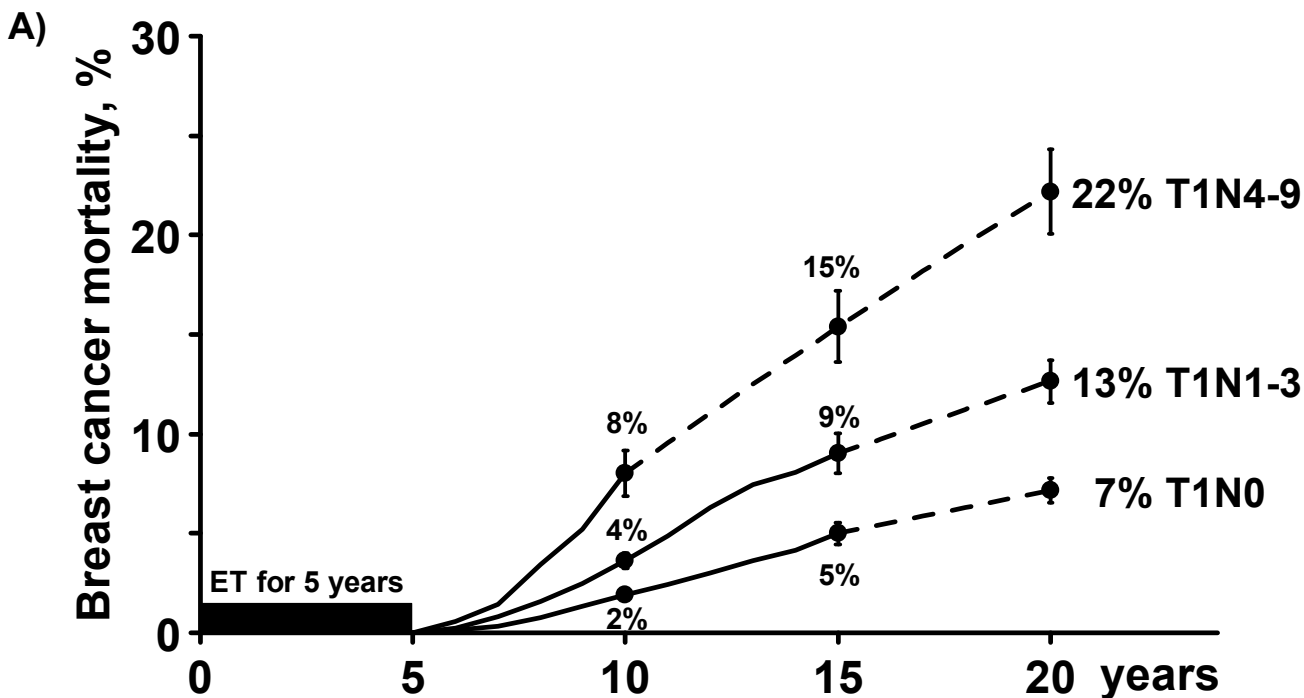

No. at risk (and, in each 5-year period, no. of events and annual rate)

|        |                   |                  |                 |     |
|--------|-------------------|------------------|-----------------|-----|
| T1N4-9 | 3832 (189, 1.4%)  | 1307 (75, 2.5%)  | 241 (16, 2.3%)  | 39  |
| T1N1-3 | 14342 (335, 0.7%) | 5342 (155, 1.3%) | 872 (40, 1.4%)  | 165 |
| T1N0   | 19402 (250, 0.4%) | 8184 (165, 0.6%) | 2456 (70, 0.8%) | 473 |

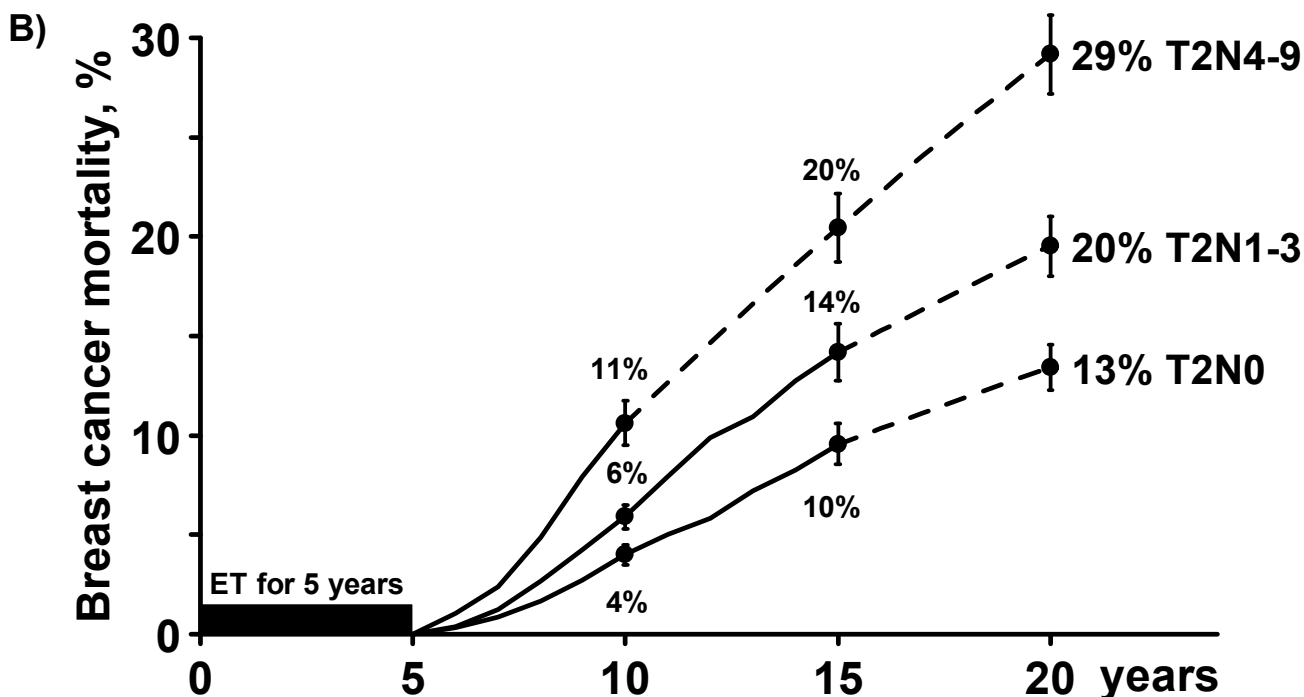

No. at risk (and, in each 5-year period, no. of events and annual rate)

|        |                   |                  |                 |     |
|--------|-------------------|------------------|-----------------|-----|
| T2N4-9 | 4952 (343, 2.0%)  | 1695 (147, 3.7%) | 308 (15, 1.4%)  | 55  |
| T2N1-3 | 10950 (399, 1.1%) | 3769 (171, 1.9%) | 645 (38, 2.0%)  | 121 |
| T2N0   | 9445 (257, 0.7%)  | 4051 (149, 1.2%) | 1189 (41, 1.0%) | 243 |

**Figure S15: Association of tumor diameter (T1a/b, T1c, and T2) in N0 disease with risk in years 5-20 of breast cancer mortality.** 28,847 women with N0 ER+ disease scheduled 5 years of ET and event-free and being followed at year 5. Bars are 95% CIs. Dashed lines indicate that event rate is that for whole 5-year period. The breast cancer mortality rate in each separate time period is estimated by subtracting the mortality rate in women without recurrence from the rate in all women. ET: endocrine therapy; T1a/b, T1c, or T2: tumor diameter 1-10, 11-20, or 21-50 mm; N0: node-negative.

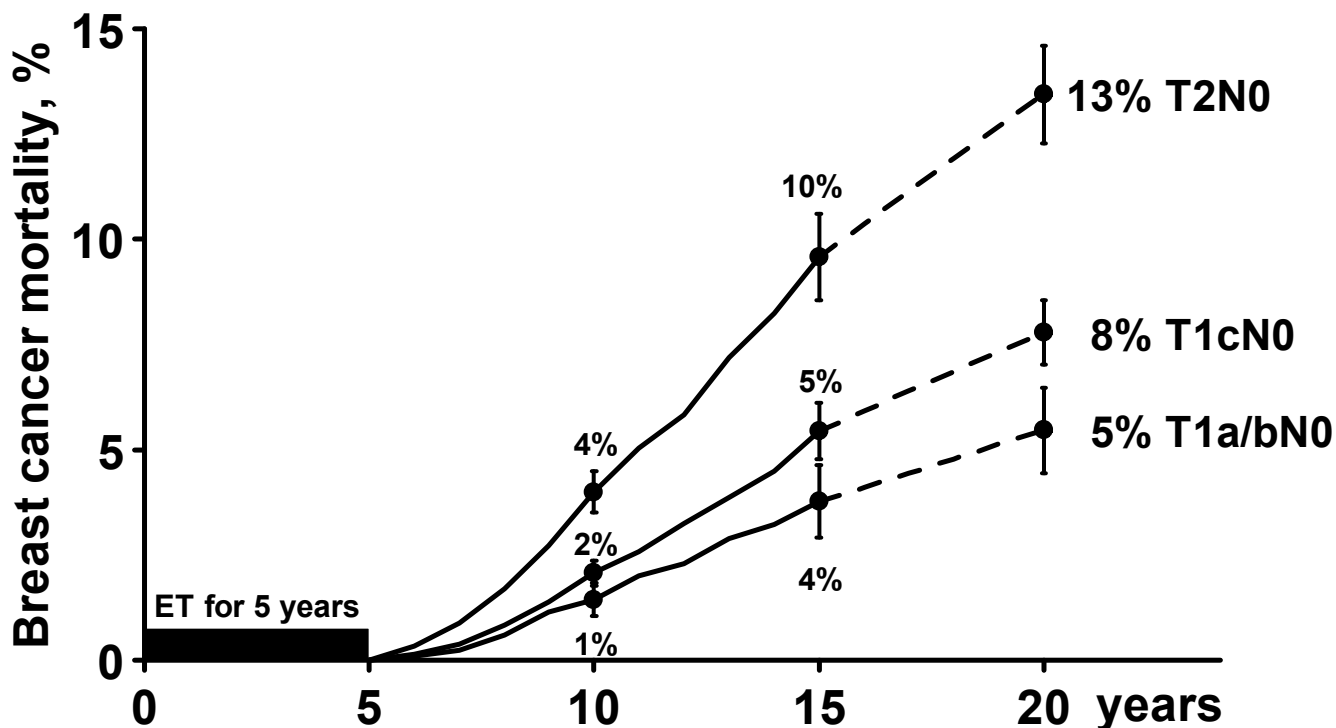

No. at risk (and, in each 5-year period, no. of events and annual rate)

|         |       |             |      |             |      |            |     |
|---------|-------|-------------|------|-------------|------|------------|-----|
| T2N0    | 9445  | (257, 0.7%) | 4051 | (149, 1.2%) | 1189 | (41, 1.0%) | 243 |
| T1cN0   | 13875 | (199, 0.4%) | 6102 | (129, 0.7%) | 1726 | (55, 1.0%) | 335 |
| T1a/bN0 | 5527  | (51, 0.3%)  | 2082 | (36, 0.5%)  | 730  | (15, 0.5%) | 138 |



**Figure S16: Association of tumor grade in T1N0 disease with risk in years 5-20 of breast cancer mortality.** 13,941 women with known grade in T1N0 ER+ disease scheduled 5 years of ET and event-free and being followed at year 5. Bars are 95% CIs. Dashed lines indicate that event rate is that for whole 5-year period. The breast cancer mortality rate in each separate time period is estimated by subtracting the mortality rate in women without recurrence from the rate in all women. ET: endocrine therapy

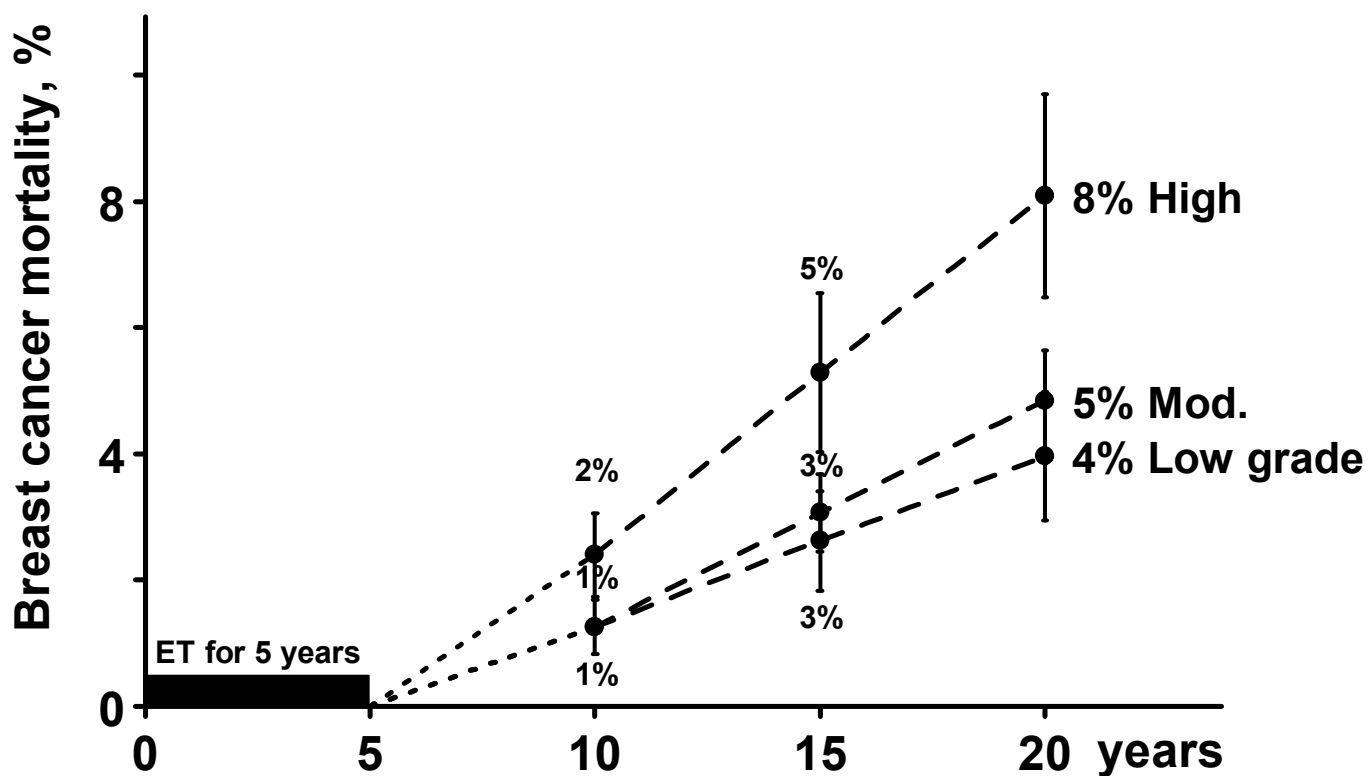

No. at risk (and, in each 5-year period, no. of events and annual rate)

|           |      |            |      |            |     |           |   |
|-----------|------|------------|------|------------|-----|-----------|---|
| High      | 3054 | (50, 0.5%) | 1027 | (22, 0.8%) | 198 | (8, 2.8%) | 4 |
| Mod.      | 7363 | (69, 0.3%) | 2829 | (53, 0.7%) | 499 | (8, 1.2%) | 6 |
| Low grade | 3524 | (33, 0.3%) | 1270 | (12, 0.3%) | 248 | (2, 0.3%) | 6 |

**Figure S17: Independent associations of various factors with breast cancer mortality rate ratio (RR) during the 5 years of endocrine therapy and after it.** 74,194 women entered at year 0 (plus some later); total 62,923 event-free and followed at year 5. Bars (and text) give 95% group-specific CIs. All RRs are stratified by treatment group. TN analyses have RR=1 for T2N0; others adjust for TN status, scaling RRs so that mean RR=1. Events = deaths (from any cause) after any recurrence.

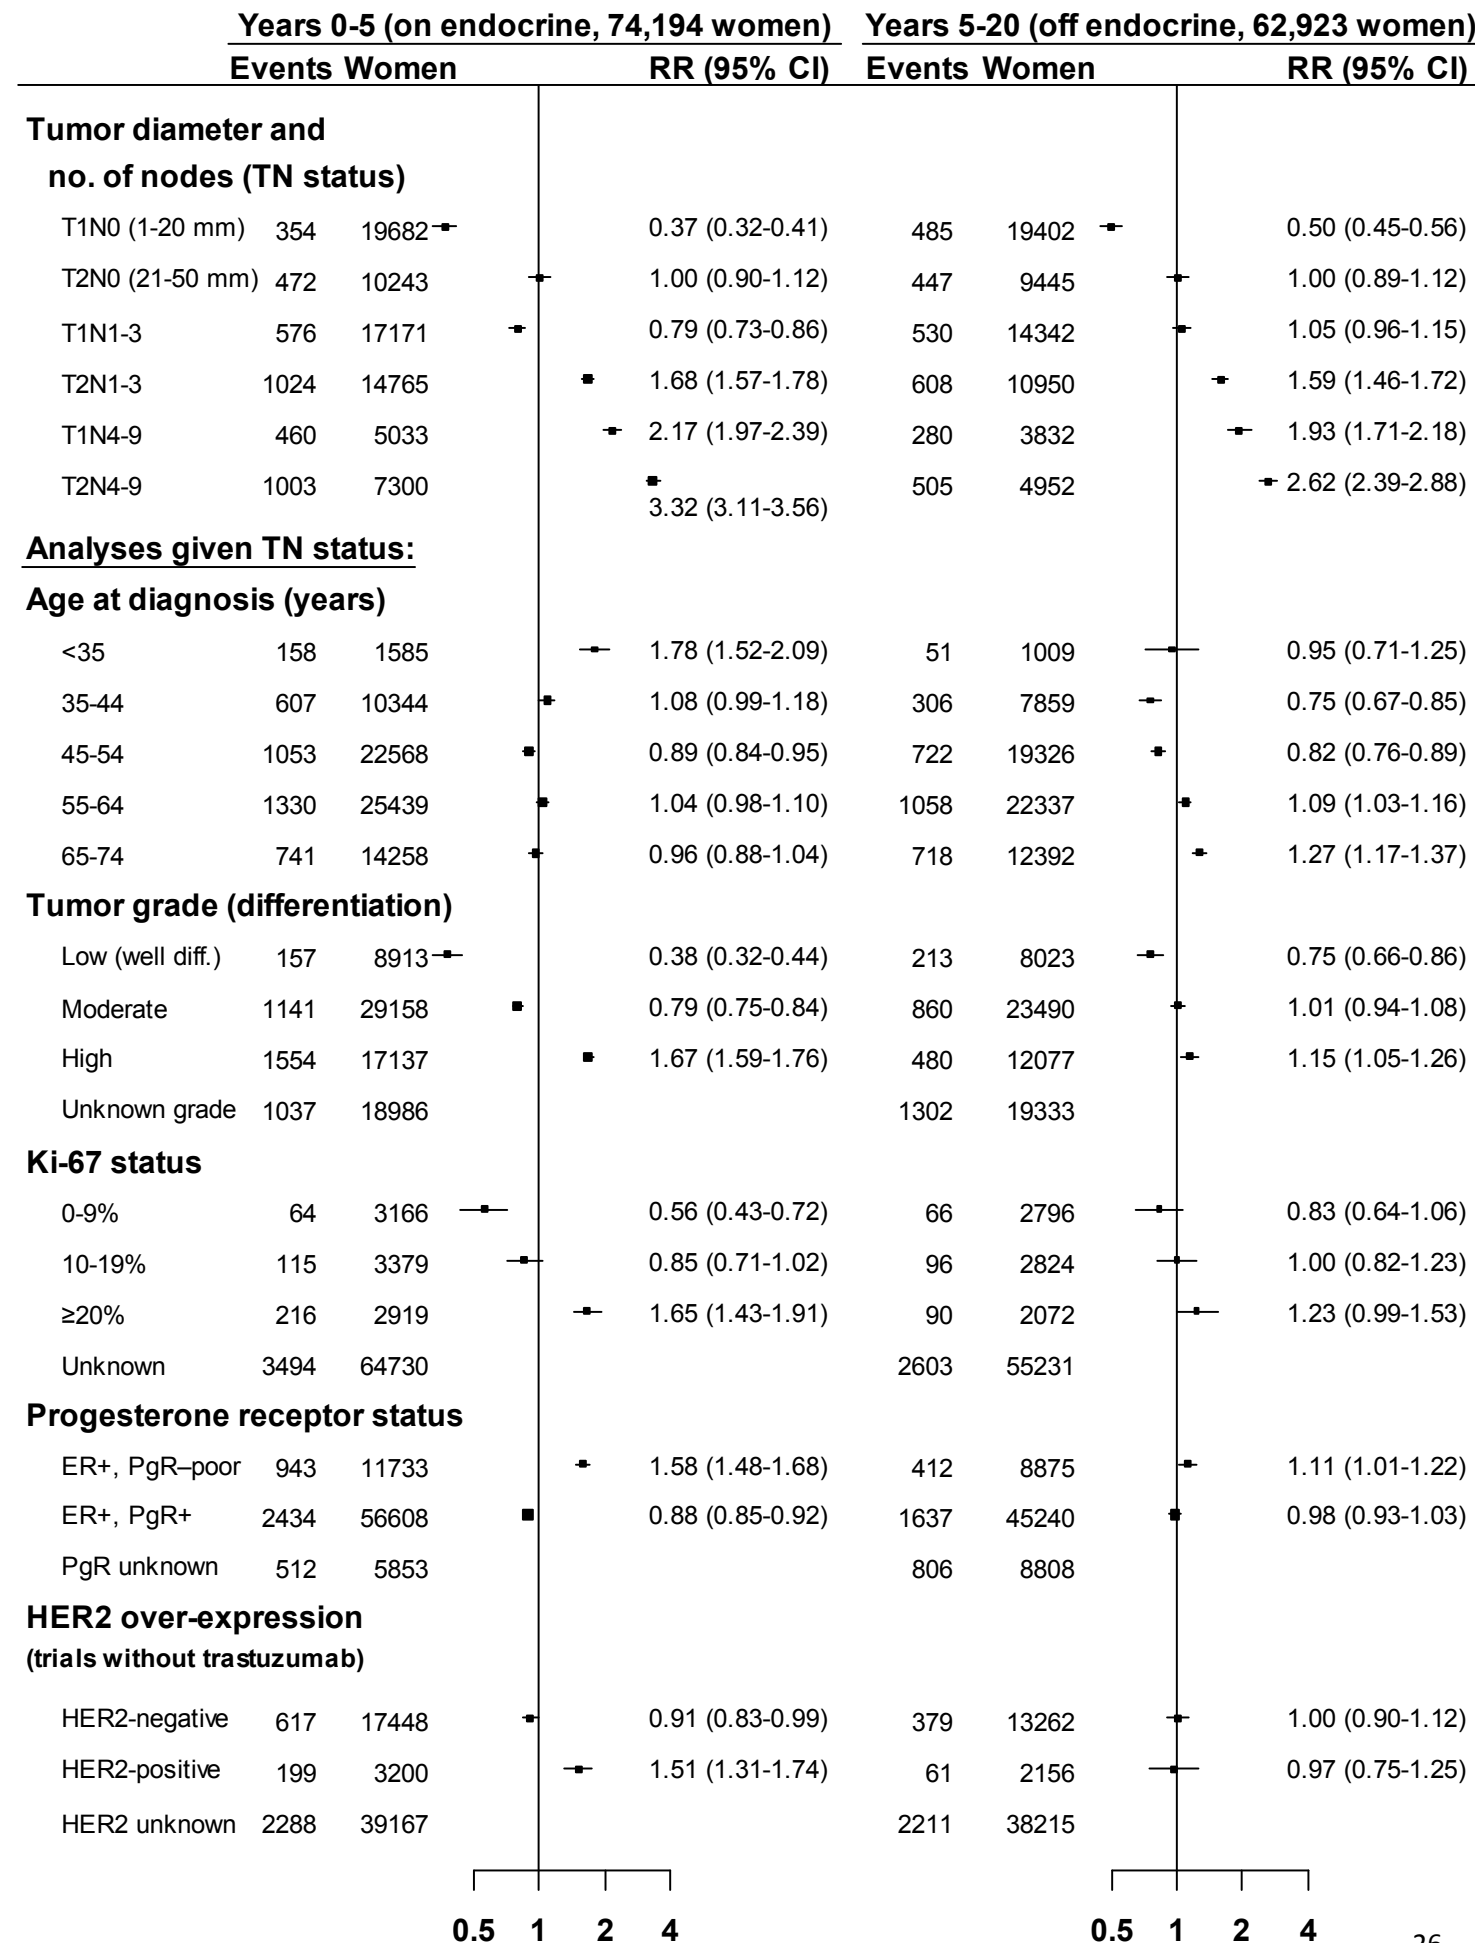

**Figure S18: Association of pathological nodal status (N0, N1-3 or N4-9) with risk from diagnosis to year 20 of loco-regional recurrence.** 74,194 women with T1/T2 N0-9 ER+ disease entered at year 0 and scheduled 5 years of ET. Bars are 95% CIs. Dashed lines indicate that event rate is that for whole 5-year period. ET: endocrine therapy

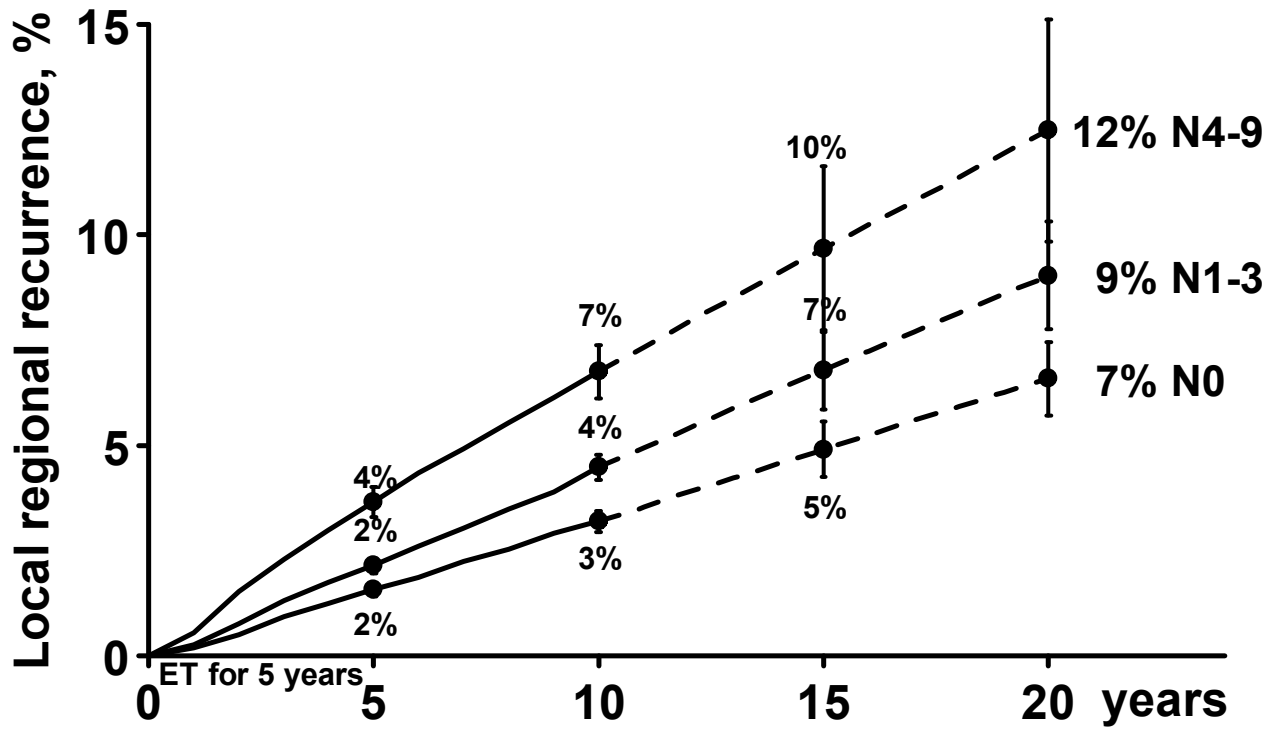

No. at risk (and, in each 5-year period, no. of events and annual rate)

|      |       |             |       |             |      |            |      |            |     |
|------|-------|-------------|-------|-------------|------|------------|------|------------|-----|
| N4-9 | 12333 | (389, 0.7%) | 7868  | (152, 0.7%) | 2001 | (22, 0.6%) | 236  | (4, 0.7%)  | 44  |
| N1-3 | 31936 | (610, 0.4%) | 23019 | (338, 0.5%) | 6860 | (70, 0.5%) | 852  | (4, 0.2%)  | 164 |
| N0   | 29925 | (434, 0.3%) | 23562 | (256, 0.3%) | 8239 | (77, 0.4%) | 1869 | (15, 0.3%) | 393 |

**Figure S19: Association of pathological nodal status with risk in years 5-20 of loco-regional recurrence.** 62,923 women with T1/T2 N0-9 ER+ disease scheduled 5 years of ET and event-free and being followed at year 5. Bars are 95% CIs. Dashed lines indicate that event rate is that for whole 5-year period. ET: endocrine therapy; T1 or T2: diameter 1-20 or 21-50 mm; N: no. involved nodes.

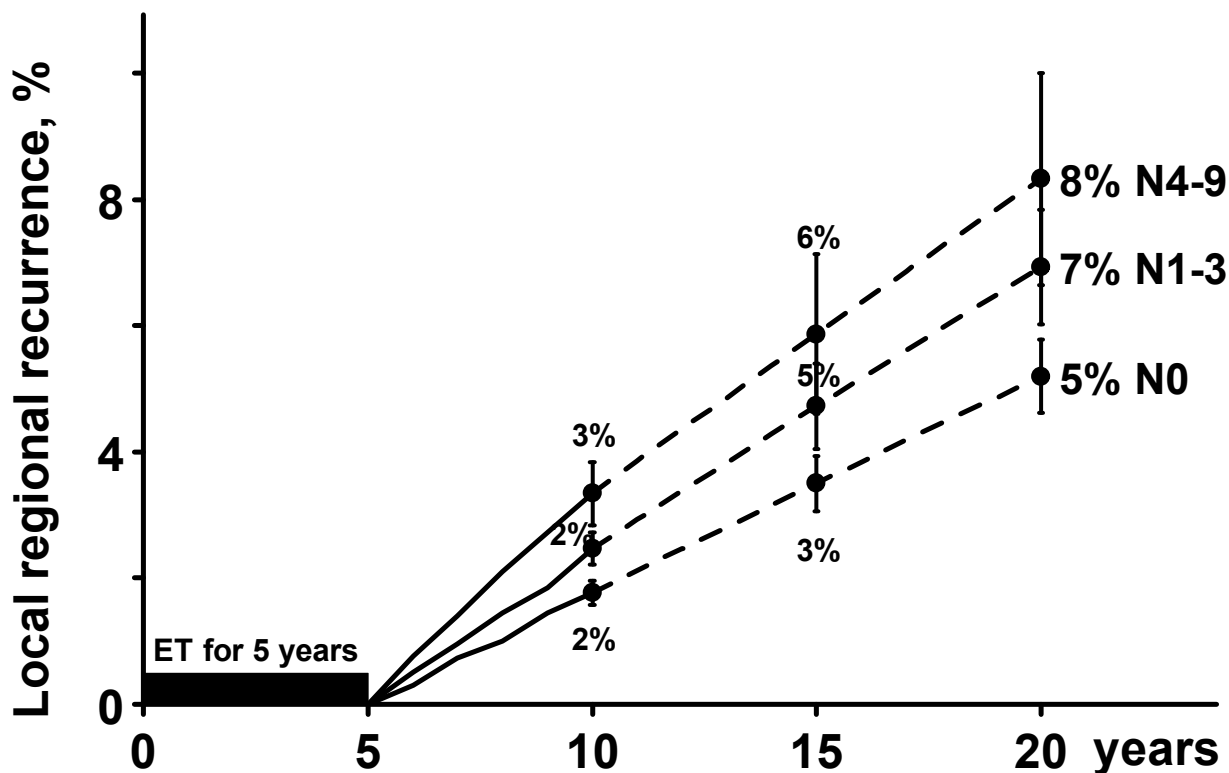

No. at risk (and, in each 5-year period, no. of events and annual rate)

|      |       |             |       |             |      |            |     |
|------|-------|-------------|-------|-------------|------|------------|-----|
| N4-9 | 8784  | (186, 0.7%) | 2593  | (27, 0.5%)  | 473  | (8, 0.7%)  | 74  |
| N1-3 | 25292 | (400, 0.5%) | 8387  | (89, 0.5%)  | 1313 | (6, 0.2%)  | 241 |
| N0   | 28847 | (354, 0.4%) | 11602 | (119, 0.4%) | 3283 | (22, 0.3%) | 617 |

**Figure S20: Association of tumor diameter (T1 or T2) in N0 disease with risk in years 5-20 of loco-regional recurrence for A) Breast-conserving surgery (BCS) and B) mastectomy.** 27,707 women with T1/T2 N0 ER+ disease scheduled 5 years of ET and event-free and being followed at year 5. Bars are 95% CIs. Dashed lines indicate that event rate is that for whole 5-year period. ET: endocrine therapy; T1 or T2: diameter 1-20 or 21-50 mm; N: no. involved nodes.

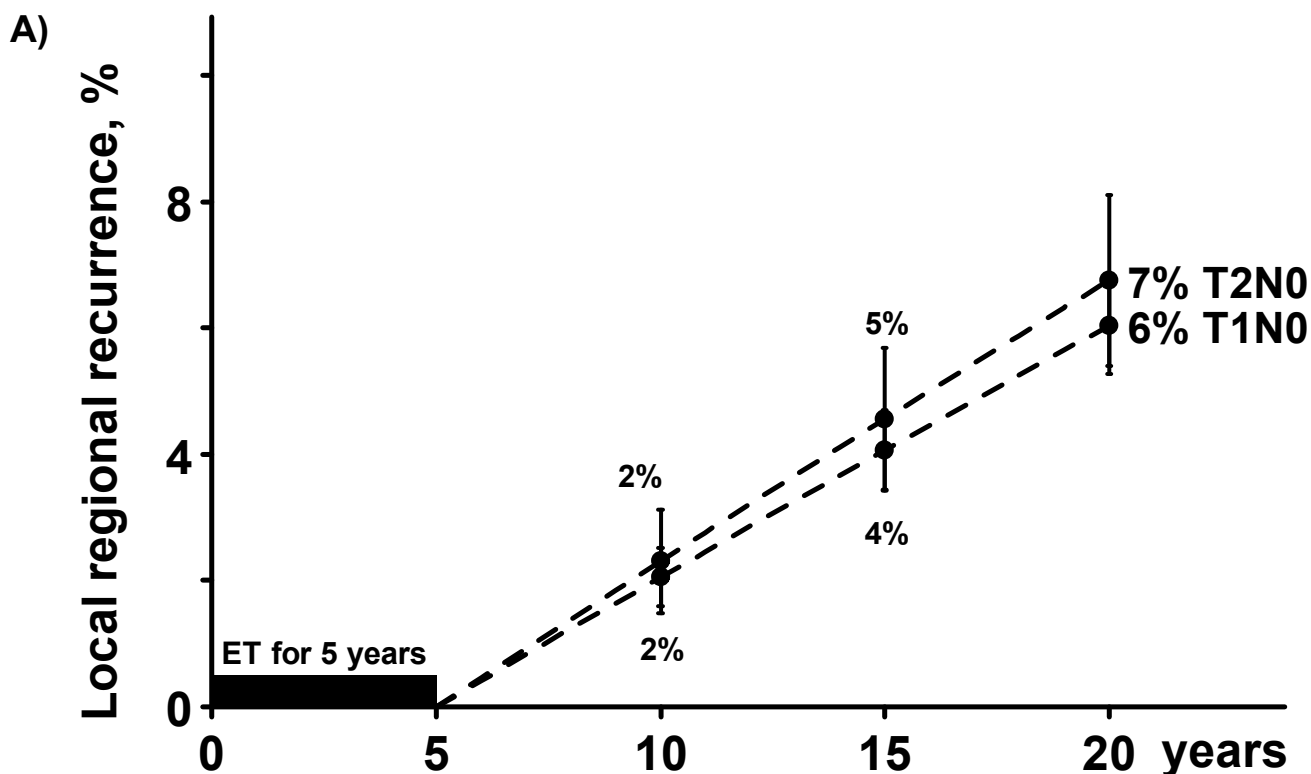

No. at risk (and, in each 5-year period, no. of events and annual rate)

|      |       |             |      |            |      |           |     |
|------|-------|-------------|------|------------|------|-----------|-----|
| T2N0 | 4225  | (70, 0.5%)  | 1549 | (17, 0.4%) | 401  | (3, 0.3%) | 91  |
| T1N0 | 11424 | (159, 0.4%) | 4655 | (60, 0.5%) | 1268 | (9, 0.3%) | 226 |

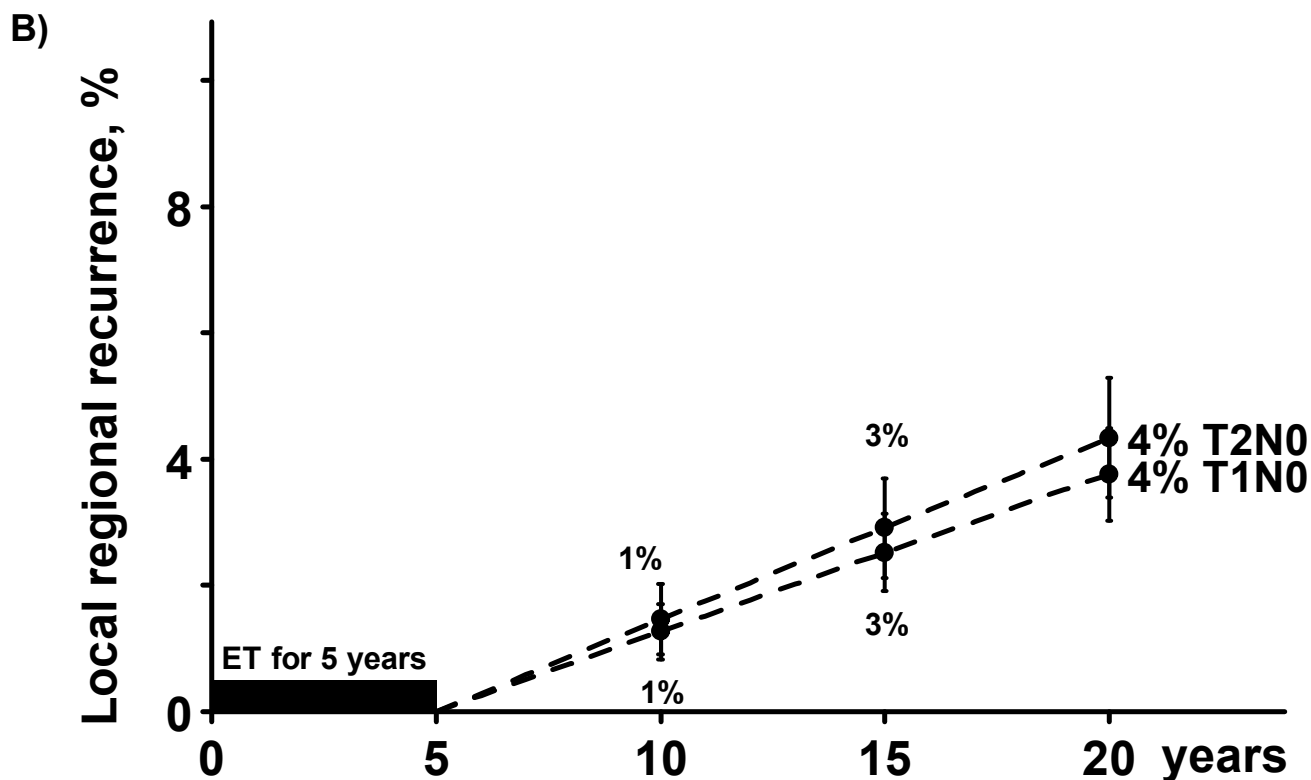

No. at risk (and, in each 5-year period, no. of events and annual rate)

|      |      |            |      |            |     |           |     |
|------|------|------------|------|------------|-----|-----------|-----|
| T2N0 | 4905 | (54, 0.3%) | 2244 | (20, 0.3%) | 671 | (3, 0.2%) | 117 |
| T1N0 | 7281 | (67, 0.3%) | 3107 | (22, 0.3%) | 941 | (7, 0.3%) | 183 |

**Figure S21: Association of tumor grade in T1N0 disease with risk in years 5-20 of loco-regional recurrence.** 13,941 women with known grade in T1N0 ER+ disease scheduled 5 years of ET and event-free and being followed at year 5. Bars are 95% CIs. Dashed lines indicate that event rate is that for whole 5-year period. ET: endocrine therapy

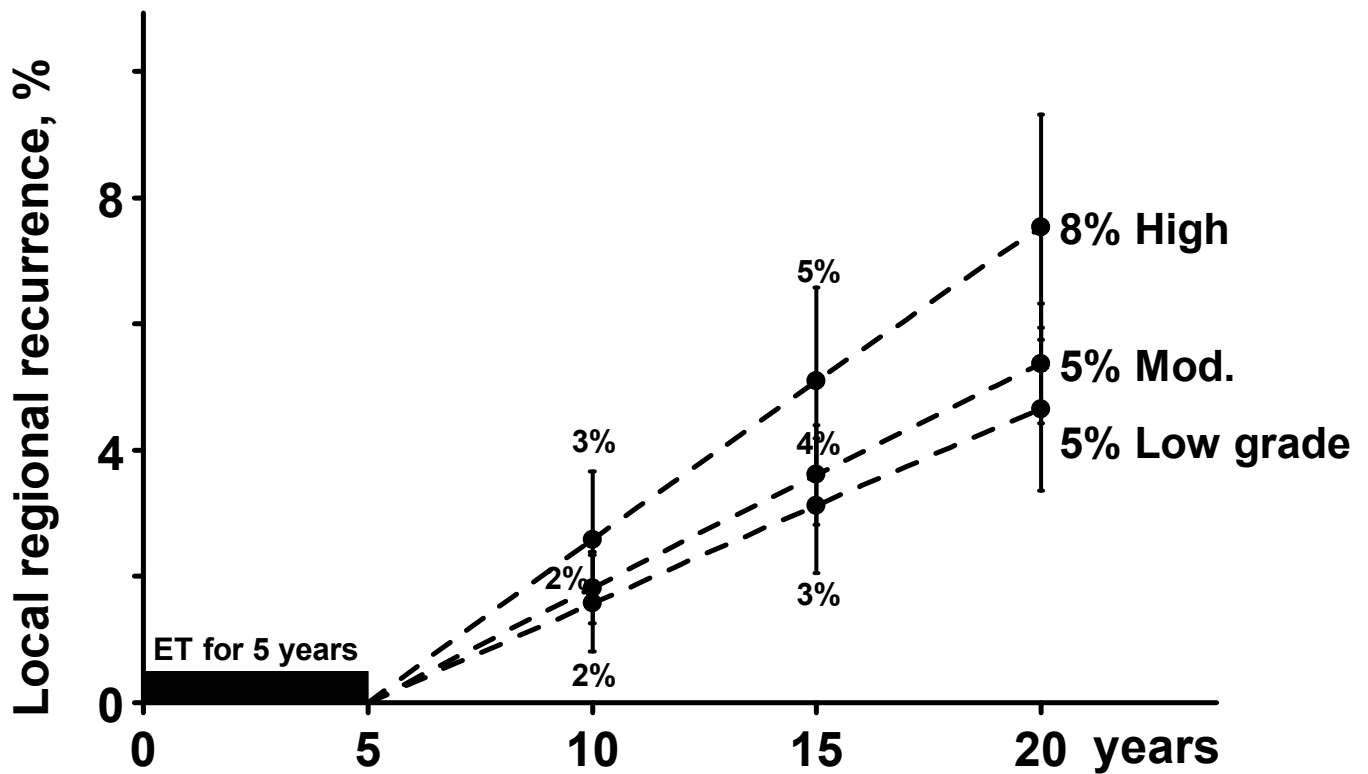

No. at risk (and, in each 5-year period, no. of events and annual rate)

|           |      |            |      |            |     |           |   |
|-----------|------|------------|------|------------|-----|-----------|---|
| High      | 3054 | (51, 0.5%) | 983  | (13, 0.6%) | 172 | (0, 0.0%) | 0 |
| Mod.      | 7363 | (84, 0.3%) | 2688 | (29, 0.5%) | 448 | (4, 0.8%) | 6 |
| Low grade | 3524 | (36, 0.3%) | 1218 | (10, 0.4%) | 227 | (2, 0.7%) | 6 |

**Figure S22: Independent associations of various factors with rate ratio of loco-regional recurrence (RR) during the 5 years of endocrine therapy and after it.** 74,194 women entered at year 0 (plus some later); total 62,923 event-free and followed at year 5. Bars (and text) give 95% group-specific CIs. All RRs are stratified by treatment group. TN analyses have RR=1 for T2N0; others adjust for TN status, scaling RRs so that mean RR=1.

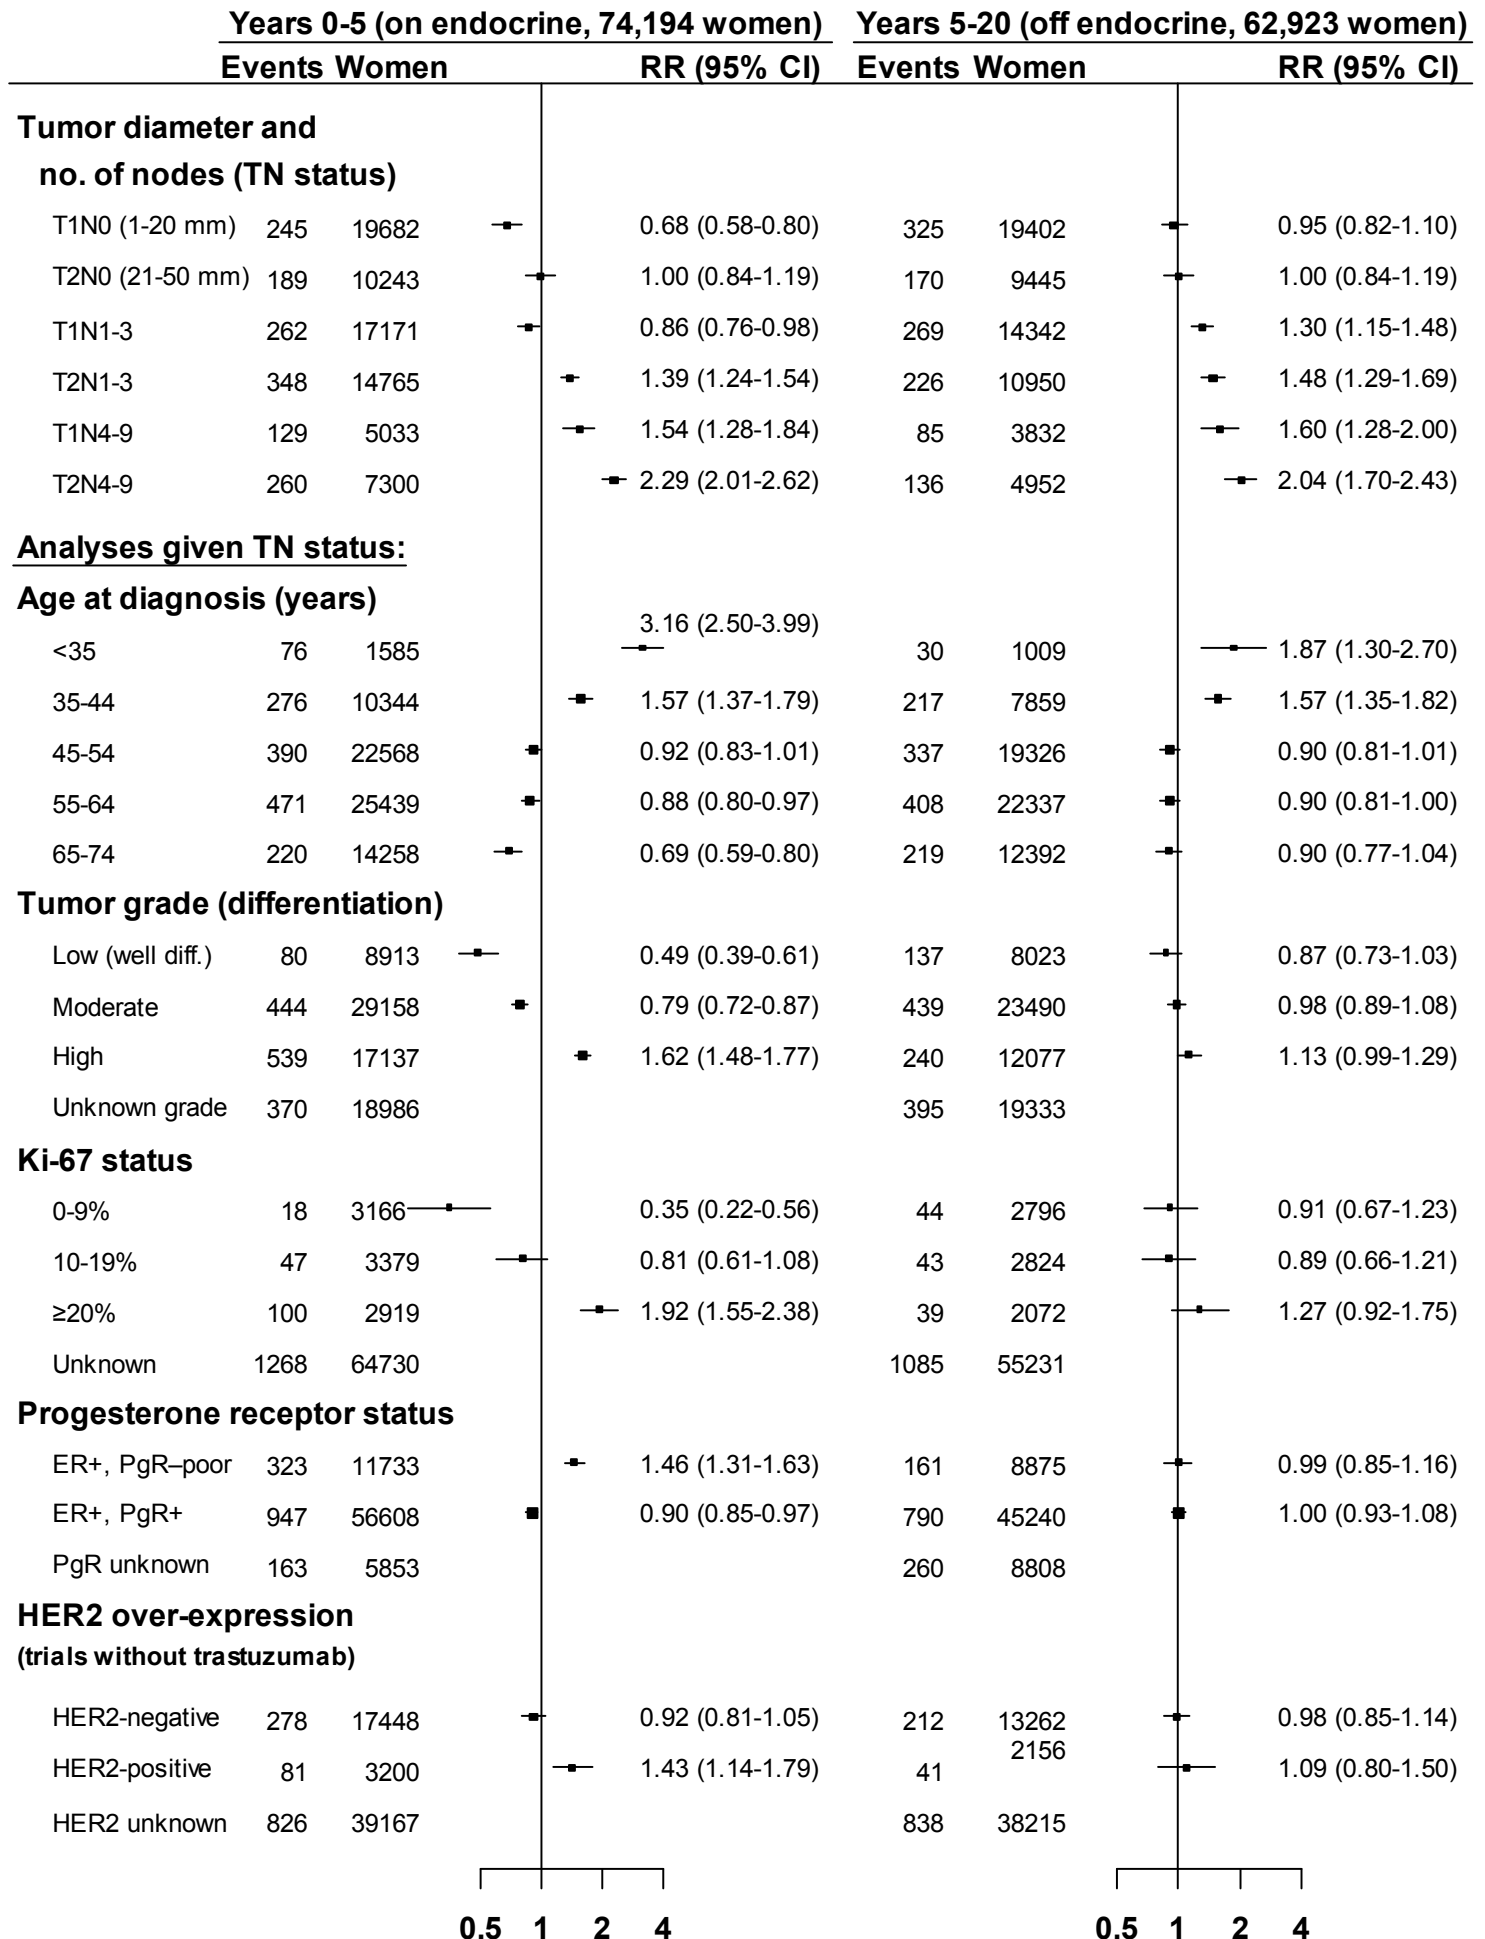

**Figure S23A: Independent associations of various factors with rate ratio (RR) of death from an unknown cause without recorded recurrence during the 5 years of endocrine therapy and after it.** 74,194 women entered at year 0 (plus some later); total 62,923 event-free and followed at year 5. Bars (and text) give 95% group-specific CIs. All RRs are stratified by treatment group. TN analyses have RR=1 for T2N0; others adjust for TN status, scaling RRs so that mean RR=1. Events = deaths from an unknown cause without recorded recurrence.

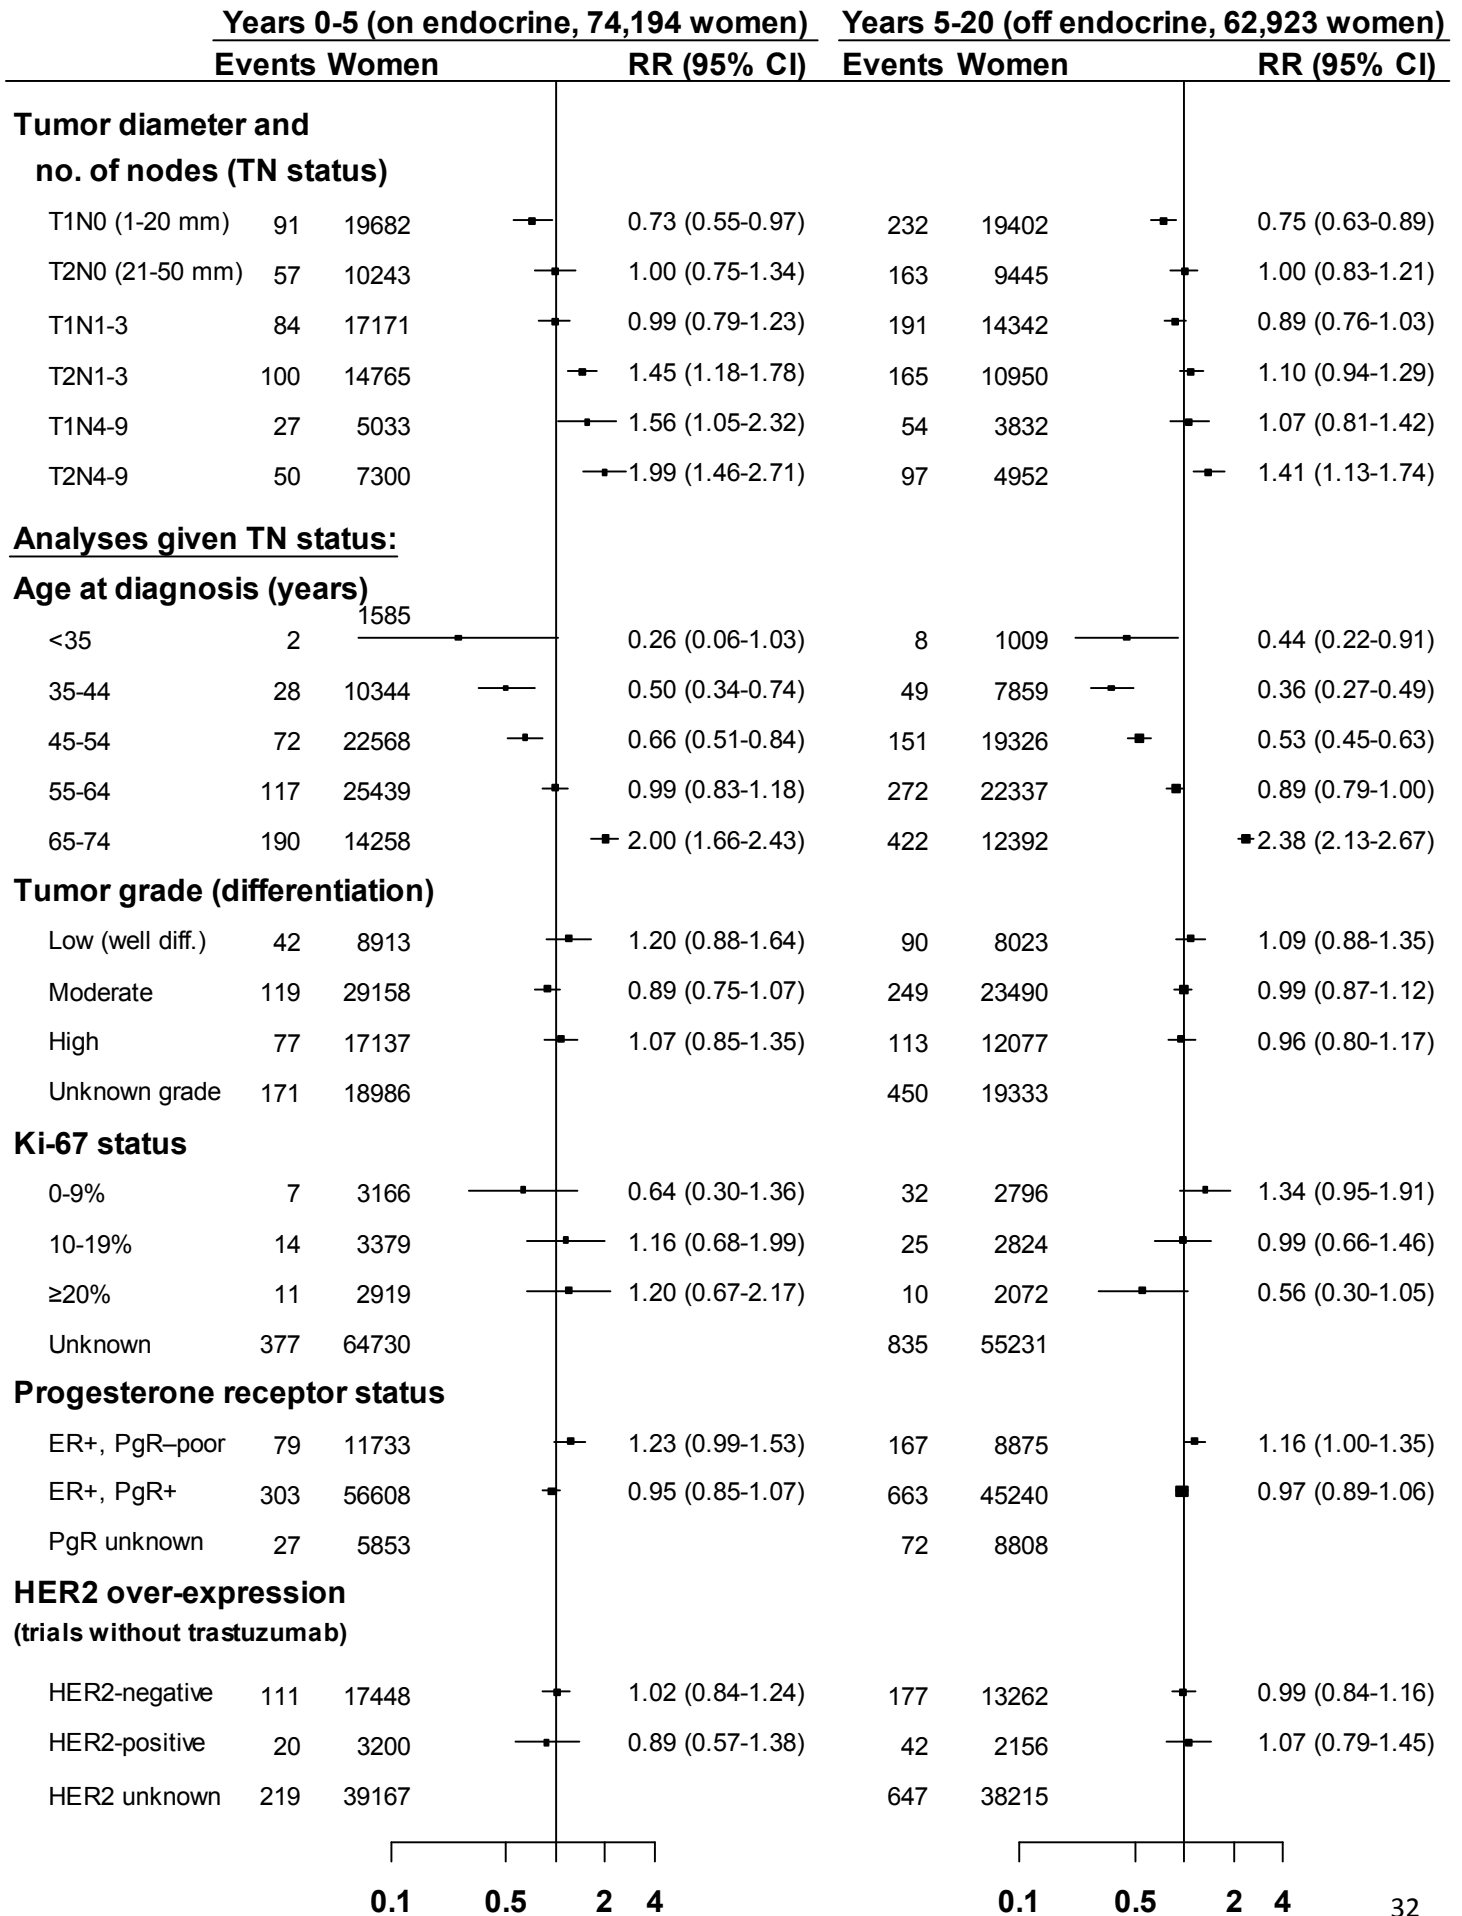



**Figure S23B: Independent associations of various factors with rate ratio (RR) of death from any cause without recorded recurrence during the 5 years of endocrine therapy and after it.** 74,194 women entered at year 0 (plus some later); total 62,923 event-free and followed at year 5. Bars (and text) give 95% group-specific CIs. All RRs are stratified by treatment group. TN analyses have RR=1 for T2N0; others adjust for TN status, scaling RRs so that mean RR=1. Events = death from any cause without recorded recurrence.

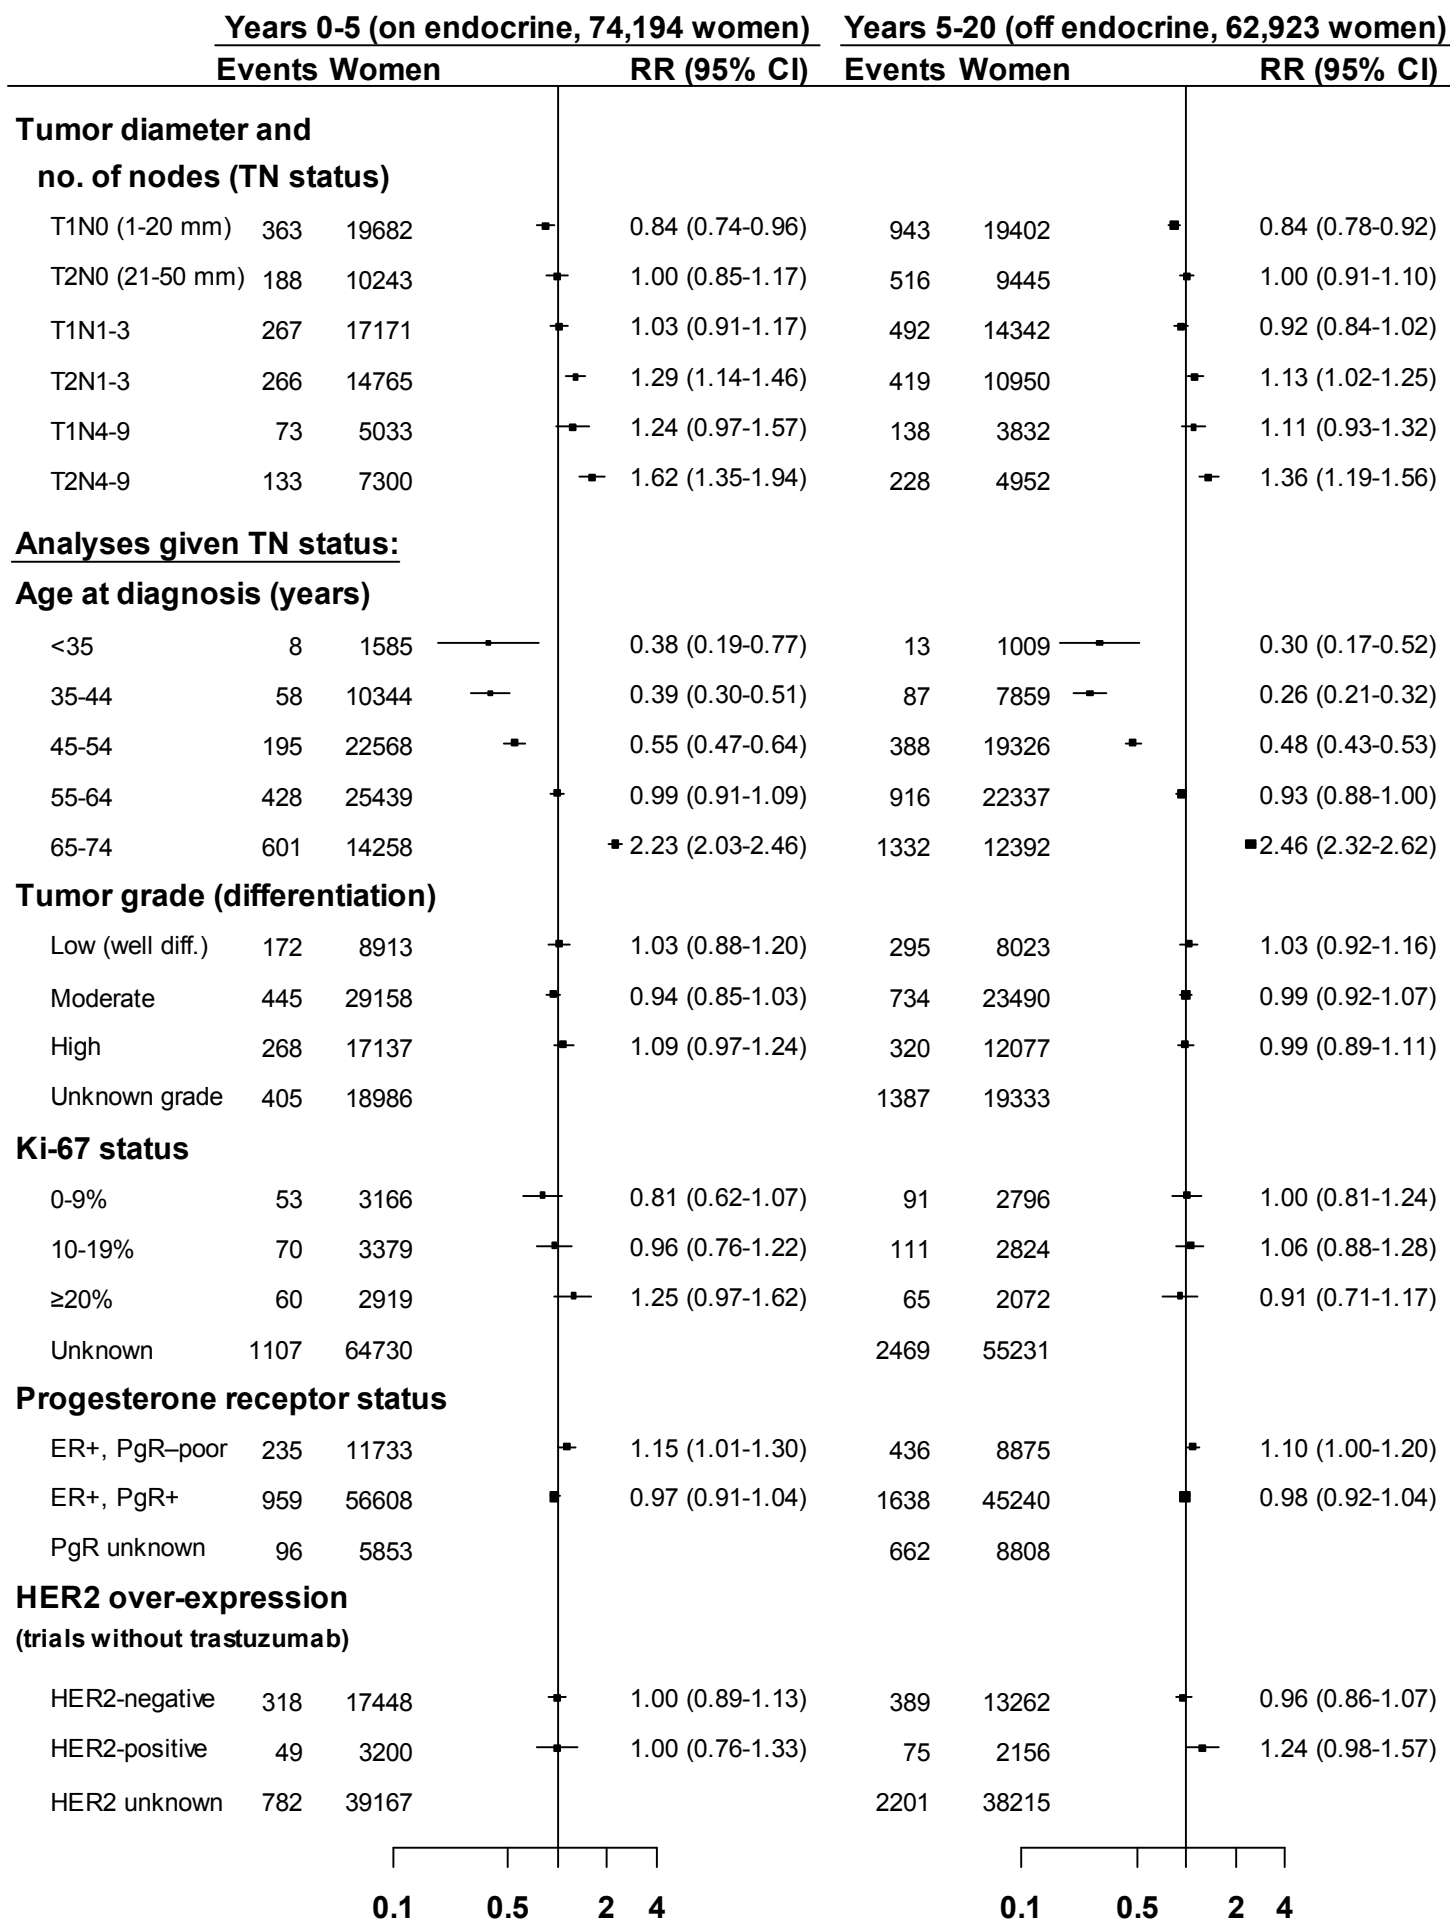

**Table S3: Characteristics of trials and women in analyses that begin at year 5** ET: endocrine therapy, AI: aromatase inhibitor, Tam: tamoxifen

| Trial group or study name | Accrual period      | Factor(s) evaluated | ET agents      | Number randomized | Characteristics of the selected women |                 |                           |                              | First author, year, corresponding author's country [and number in list of references] |
|---------------------------|---------------------|---------------------|----------------|-------------------|---------------------------------------|-----------------|---------------------------|------------------------------|---------------------------------------------------------------------------------------|
|                           |                     |                     |                |                   | Number selected                       | TN status       | Median years of age (IQR) | Median years follow-up (IQR) |                                                                                       |
| Swedish BCCG              | Nov 1976 - May 1990 | ET                  | Tam            | 2738              | 242                                   | T1/T2; N0, N1-9 | 61.0 (57.0-66.0)          | 20.8 (15.2-24.4)             | Rutqvist, 2007, Sweden[1]                                                             |
| Scottish B                | Apr 1978 - Sep 1984 | ET                  | Tam            | 1323              | 63                                    | T1/T2; N0, N1-9 | 58.0 (54.0-66.0)          | 13.7 (5.8-21.2)              | Stewart, 2001, UK[2]                                                                  |
| NSABP B-14                | Jan 1982 - Jan 1988 | ET                  | Tam            | 4127              | 1068                                  | T1/T2; N0       | 56.0 (48.0-63.0)          | 18.5 (8.6-20.5)              | Fisher, 1996, USA[3]                                                                  |
| ECOG EST5181              | Feb 1982 - Jun 1987 | ET                  | Tam            | 658               | 91                                    | T1/T2; N1-9     | 45.0 (39.0-48.0)          | 15.2 (7.6-19.1)              | Tormey, 1992, USA[4]                                                                  |
| ECOG EST4181              | Mar 1982 - Dec 1986 | ET                  | Tam            | 962               | 148                                   | T1/T2; N1-9     | 61.0 (56.0-65.0)          | 9.6 (4.8-16.0)               | Falkson, 1990, USA[5]                                                                 |
| Swedish BCCG              | Dec 1982 - Dec 1994 | ET                  | Tam            | 3647              | 643                                   | T1/T2; N0, N1-9 | 63.0 (58.0-68.0)          | 15.8 (8.3-20.2)              | Swedish Breast Cancer Cooperative Group, 1996, Sweden[6]                              |
| GROCTA I Italy            | Nov 1983 - Jun 1987 | ET/Chemo            | Tam            | 504               | 277                                   | T1/T2; N1-9     | 53.0 (46.0-59.0)          | 16.0 (6.9-23.7)              | Boccardo, 2011, Italy[7]                                                              |
| Scottish                  | Apr 1985 - Oct 1991 | Radiotherapy        | Tam            | 589               | 265                                   | T1/T2; N0, N1-9 | 59.0 (52.0-63.0)          | 14.3 (10.6-16.7)             | Forrest, 1996, UK[8]                                                                  |
| IBCSG VII                 | Jul 1986 - Apr 1993 | Chemo               | Tam            | 1266              | 802                                   | T1/T2; N1-9     | 61.0 (56.0-65.0)          | 12.3 (6.7-16.0)              | International Breast Cancer Study Group, 1997, Switz.[9]                              |
| CRC, UK                   | Jan 1987 - Feb 1997 | ET                  | Tam            | 3888              | 75                                    | T1/T2; N0, N1-9 | 59.0 (52.0-65.0)          | 10.7 (9.3-12.2)              | Hackshaw,, 2011, UK[10]                                                               |
| GRETA Trieste             | Mar 1987 - Jun 1992 | ET                  | Tam            | 474               | 41                                    | T1/T2; N0, N1-9 | 72.0 (72.0-73.0)          | 9.1 (6.0-13.0)               | Mustacchi, 2015, Italy[11]                                                            |
| Brussels Belgium          | Jun 1988 - Apr 1997 | Chemo               | Tam            | 804               | 328                                   | T1/T2; N1-9     | 49.0 (43.0-57.0)          | 13.7 (8.3-16.4)              | Piccart, 2001, Belgium[12]                                                            |
| IBCSG IX                  | Oct 1988 - Aug 1999 | ET/Chemo            | Tam            | 1715              | 1275                                  | T1/T2; N0       | 60.0 (56.0-65.0)          | 12.4 (9.6-15.4)              | Aebi, 2011, Switz. [13]                                                               |
| NSABP B-20                | Oct 1988 - Mar 1993 | ET/Chemo            | Tam            | 2363              | 2197                                  | T1/T2; N0, N1-3 | 51.0 (44.0-60.0)          | 13.9 (12.1-15.2)             | Fisher, 1997, USA[14]                                                                 |
| GROCTA II Italy           | Jan 1989 - Jan 1997 | ET/Chemo            | Tam/LHRHI      | 244               | 114                                   | T1/T2; N0, N1-9 | 47.0 (43.0-49.0)          | 6.2 (4.3-8.6)                | Boccardo, 2000, Italy[15]                                                             |
| SWOG 8814                 | Jun 1989 - Jul 1995 | Chemo               | Tam            | 1558              | 1191                                  | T1/T2; N1-9     | 60.0 (55.0-66.0)          | 10.7 (7.0-12.8)              | Albain, 2009, USA[16]                                                                 |
| ECOG EST5188              | Jul 1989 - Feb 1994 | ET/Chemo            | Tam/LHRHI      | 1537              | 386                                   | T1/T2; N1-9     | 43.0 (39.0-47.0)          | 13.2 (8.9-14.8)              | Davidson, 2005, USA[17]                                                               |
| SITAM-01                  | Jul 1989 - Dec 1996 | ET                  | Tam            | 1901              | 385                                   | T1/T2; N0, N1-9 | 62.0 (57.0-66.0)          | 12.0 (10.0-13.5)             | Sacco, 2003, Italy[18]                                                                |
| SWOG 8897                 | Jul 1989 - Feb 1993 | ET/Chemo            | Tam            | 2690              | 663                                   | T1/T2; N0       | 49.0 (42.0-58.0)          | 12.9 (11.3-13.9)             | Hutchins, 2005, USA[19]                                                               |
| DBCg 89c                  | Jan 1990 - Dec 1996 | ET                  | Tam            | 2322              | 337                                   | T1/T2; N1-9     | 61.0 (55.0-67.0)          | 14.8 (8.4-16.2)              | Andersen, 2008, Denmark[20](just 337 women with 5-yr ET)                              |
| RMH London                | Feb 1990 - Aug 1995 | ET/Chemo            | Tam            | 305               | 107                                   | T1/T2; N0       | 56.0 (49.0-63.0)          | 7.0 (5.3-8.3)                | Powles, 1995, UK[21]                                                                  |
| Austrian BCSG V           | Dec 1990 - Jun 1999 | ET/Chemo            | Tam/LHRHI      | 1100              | 449                                   | T1/T2; N0, N1-9 | 45.0 (42.0-49.0)          | 10.3 (7.6-12.8)              | Jakesz, 2002, Austria[22]                                                             |
| Austrian BCSG VI          | Dec 1990 - Dec 1995 | ET                  | Tam            | 2021              | 1288                                  | T1/T2; N0, N1-9 | 64.0 (58.0-69.0)          | 11.1 (9.0-12.8)              | Schmid, 2003, Austria[23]                                                             |
| aTTom, UK                 | Jul 1991 - Mar 2005 | ET                  | Tam            | 6953              | 725                                   | T1/T2; N0       | 55.0 (50.0-62.0)          | 15.0 (14.2-16.1)             | Gray, 2013, UK[24]                                                                    |
| ICCG C/9/91 UK            | Mar 1992 - Jul 2000 | Chemo               | Tam            | 785               | 136                                   | T1/T2; N1-9     | 46.0 (42.0-49.0)          | 7.6 (5.3-10.0)               | Bliss, 2002, UK[25]                                                                   |
| NCI Hanoi 9201            | Aug 1992 - Jun 1999 | oophorectomy        | Tam            | 709               | 56                                    | T1/T2; N0       | 41.0 (36.5-44.0)          | 7.6 (6.4-8.9)                | Love, 2002, USA[26]                                                                   |
| GROCTA IV Italy           | Sep 1992 - Jan 1998 | ET                  | Tam/AI         | 380               | 264                                   | T1/T2; N0, N1-9 | 62.0 (57.0-66.5)          | 11.9 (10.4-13.2)             | Boccardo, 2001, Italy[27]                                                             |
| GONO Italy MIG 1          | Nov 1992 - Jun 1997 | Chemo               | Tam            | 710               | 612                                   | T1/T2; N0, N1-9 | 54.0 (46.0-60.0)          | 9.0 (7.3-14.4)               | Venturini, 2005, Italy[28]                                                            |
| ICR-CTSU (NCRI BCSG)      | Dec 1992 - Oct 2000 | ET/Chemo            | Tam            | 3854              | 1372                                  | T1/T2; N0, N1-9 | 48.0 (43.0-55.0)          | 8.1 (5.8-10.0)               | Bliss, 2007; UK[29, 30]                                                               |
| NCIC MA.12                | Jan 1993 - Dec 1999 | ET                  | Tam            | 672               | 43                                    | T1/T2; N0       | 46.0 (42.0-49.0)          | 8.2 (7.4-8.9)                | Bramwell, 2010, Canada[31]                                                            |
| GABG 4 Germany            | Feb 1993 - Dec 2000 | ET                  | Tam            | 829               | 46                                    | T1/T2; N4-9     | 55.0 (53.0-63.0)          | 5.0 (3.1-6.7)                | Kaufmann, 2005, Germany[32]                                                           |
| IBCSG 10-93               | May 1993 - Dec 2002 | Surgery             | Tam            | 473               | 186                                   | T1/T2; N0       | 72.0 (69.0-73.0)          | 5.5 (4.0-7.1)                | International Breast Cancer Study Group, 2006, Sweden[33]                             |
| IBCSG 11-93               | May 1993 - Nov 1998 | Chemo               | Tam/ovary supp | 174               | 162                                   | T1/T2; N1-9     | 45.0 (42.0-48.0)          | 13.5 (10.6-15.1)             | Thürlimann, 2009, Switzerland[34]                                                     |
| IBCSG 12-93               | May 1993 - Jul 1999 | ET/Chemo            | Tam/toremifene | 452               | 402                                   | T1/T2; N0, N1-9 | 59.0 (56.0-65.0)          | 10.7 (7.6-12.5)              | International Breast Cancer Study Group, 2004, Switz.[35]                             |
| IBCSG 13-93               | May 1993 - Aug 1999 | ET/Chemo            | Tam            | 1294              | 320                                   | T1/T2; N1-9     | 44.0 (39.0-47.0)          | 11.6 (7.0-14.1)              | International Breast Cancer Study Group, 2006, Italy[36]                              |
| IBCSG 14-93               | May 1993 - Jul 1999 | ET/Chemo            | Tam/toremifene | 969               | 489                                   | T1/T2; N0, N1-9 | 57.0 (53.0-61.0)          | 10.0 (7.4-12.0)              | International Breast Cancer Study Group, 2007, Italy[37]                              |
| MDA 94-002                | May 1994 - Aug 1998 | Chemo               | Tam            | 524               | 39                                    | T1/T2; N0, N1-3 | 57.0 (52.0-62.0)          | 12.7 (9.5-13.5)              | Buzdar, 2002, USA[38]                                                                 |

| Trial group or study name | Accrual period      | Factor(s) evaluated | ET agents      | Number randomized | Characteristics of the selected women |                 |                           |                              | First author, year, corresponding author's country [and number in list of references] |
|---------------------------|---------------------|---------------------|----------------|-------------------|---------------------------------------|-----------------|---------------------------|------------------------------|---------------------------------------------------------------------------------------|
|                           |                     |                     |                |                   | Number selected                       | TN status       | Median years of age (IQR) | Median years follow-up (IQR) |                                                                                       |
| CALGB 9343                | Jul 1994 - Feb 1999 | Radiotherapy        | Tam            | 647               | 249                                   | T1/T2; N0, N1-9 | 72.0 (71.0-74.0)          | 6.9 (5.9-7.8)                | Hughes, 2004, USA[39]                                                                 |
| EST3193/INT0142           | Sep 1994 - Nov 1997 | ET                  | Tam/ovary supp | 345               | 333                                   | T1/T2; N0       | 45.0 (41.0-48.0)          | 9.9 (8.9-10.6)               | Tevaarwerk, 2014, USA[40]                                                             |
| GOIRC SANG 2B R1          | Oct 1994 - Apr 2000 | Chemo               | Tam            | 489               | 335                                   | T1/T2; N0, N1-9 | 54.0 (47.0-60.0)          | 7.6 (6.0-9.2)                | Cocconi, 2000, Italy[41]                                                              |
| MDA 98-240                | Nov 1994 - Jul 2001 | Chemo               | Tam            | 480               | 247                                   | T1/T2; N0, N1-9 | 51.0 (44.0-57.0)          | 3.8 (3.2-4.9)                | Green, 2005, USA[42]                                                                  |
| GEICAM 9401 Spain         | Jun 1995 - Jun 2000 | ET                  | Tam            | 485               | 215                                   | T1/T2; N0, N1-9 | 62.0 (58.0-66.0)          | 6.0 (4.2-7.9)                | Pico, 2004, Spain[43]                                                                 |
| HORG Greece               | Jun 1995 - Oct 2004 | Chemo               | Tam            | 788               | 318                                   | T1/T2; N1-9     | 56.0 (47.0-65.0)          | 5.3 (3.6-7.2)                | Polyzos, 2010, Greece[44]                                                             |
| IBCSG 15-95               | Jul 1995 - Mar 2000 | Chemo               | Tam            | 344               | 12                                    | T1/T2; N4-9     | 49.0 (40.0-53.5)          | 11.5 (9.0-12.4)              | Colleoni, 2009, Italy[45]                                                             |
| GOCS 08-BR-95-III         | Aug 1995 - Apr 2004 | Chemo               | Tam            | 126               | 43                                    | T1/T2; N0, N1-9 | 55.0 (42.0-64.0)          | 6.3 (3.3-9.5)                | Leone, 2014, USA[46]                                                                  |
| NSABP B-28                | Aug 1995 - May 1998 | Chemo               | Tam            | 3060              | 982                                   | T1/T2; N1-9     | 57.0 (53.0-62.0)          | 9.6 (8.6-10.3)               | Mamounas, 2005, USA[47]                                                               |
| E-EB193/INT0151           | Oct 1995 - Oct 1999 | Fenretinide         | Tam            | 426               | 309                                   | T1/T2; N0, N1-9 | 67.0 (62.0-71.0)          | 6.8 (5.6-7.9)                | Rao, 2011, USA[48]                                                                    |
| ATAC, UK                  | Jul 1996 - Mar 2000 | ET                  | Tam/Al         | 9366              | 4012                                  | T1/T2; N0, N1-9 | 61.0 (56.0-67.0)          | 9.8 (7.3-10.1)               | Baum, 2002, UK[49]                                                                    |
| ECTO Italy                | Nov 1996 - May 2002 | Chemo               | Tam            | 1355              | 629                                   | T1/T2; N0, N1-9 | 51.0 (44.0-59.0)          | 8.9 (5.8-10.9)               | Gianni, 2005, 2009, Italy[50, 51]                                                     |
| GONO Italy MIG 5          | Nov 1996 - Jan 2001 | Chemo               | Tam            | 1055              | 762                                   | T1/T2; N1-9     | 53.0 (45.0-61.0)          | 12.0 (9.8-13.4)              | Del Mastro, 2016, Italy[52]                                                           |
| ATLAS                     | Dec 1996 - May 2005 | ET                  | Tam            | 12894             | 2958                                  | T1/T2; N0, N1-9 | 55.0 (47.0-63.0)          | 16.0 (12.7-18.0)             | Davies, 2013, UK[53]                                                                  |
| GABG/ARNO Germany         | Dec 1996 - Aug 2002 | ET                  | Tam/Al         | 1040              | 808                                   | T1/T2; N0, N1-9 | 58.0 (54.0-62.0)          | 8.2 (6.9-10.1)               | Kaufmann, 2007, Germany[54]                                                           |
| IBIS 02 Italy             | Apr 1997 - Jan 2004 | Chemo               | Tam            | 244               | 126                                   | T1/T2; N4-9     | 52.5 (47.0-59.0)          | 8.0 (6.2-9.7)                | Boccardo, 2010, Italy[55]                                                             |
| BCIRG 001                 | Jun 1997 - Jun 1999 | Chemo               | Tam            | 1491              | 797                                   | T1/T2; N1-9     | 49.0 (44.0-56.0)          | 10.4 (9.3-10.5)              | Martin, 2005, Spain[56]                                                               |
| PACS 01 France            | Jun 1997 - Mar 2000 | Chemo               | Tam            | 1999              | 983                                   | T1/T2; N1-9     | 50.0 (45.0-56.0)          | 7.5 (6.7-8.1)                | Roché, 2006, France[57]                                                               |
| USO 97-35                 | Jun 1997 - Dec 1999 | Chemo               | Tam            | 1016              | 642                                   | T1/T2; N0, N1-9 | 52.0 (45.0-60.0)          | 5.4 (4.9-6.2)                | Jones, 2006, USA[58]                                                                  |
| DEVA UK                   | Aug 1997 - Aug 2005 | Chemo               | Tam            | 803               | 537                                   | T1/T2; N0, N1-9 | 59.0 (55.0-64.0)          | 5.0 (3.5-6.8)                | Coombes, 2011, UK[59]                                                                 |
| IBIS 03 Italy             | Nov 1997 - Dec 2004 | Chemo               | Tam            | 1066              | 782                                   | T1/T2; N0, N1-3 | 52.0 (44.0-60.0)          | 5.7 (4.0-7.6)                | Amadori, 2011, Italy[60]                                                              |
| Int Exemestane Study, IES | Feb 1998 - Feb 2003 | ET                  | Tam/Al         | 4742              | 2942                                  | T1/T2; N0, N1-9 | 61.0 (56.0-66.0)          | 9.6 (8.9-10.2)               | Coombes, 2004, UK[61]                                                                 |
| IBCSG BIG 1-98            | Mar 1998 - May 2003 | ET                  | Tam/Al         | 8010              | 6916                                  | T1/T2; N0, N1-9 | 61.0 (56.0-66.0)          | 8.0 (7.1-9.1)                | Regan, 2011, USA[62]                                                                  |
| ITA Italy                 | Mar 1998 - Dec 2002 | ET                  | Tam/Al         | 448               | 297                                   | T1/T2; N1-9     | 61.0 (53.0-67.0)          | 12.3 (10.5-13.4)             | Boccardo, 2005, Italy[63]                                                             |
| BIG 02-98                 | Jun 1998 - Jun 2001 | Chemo               | Tam            | 2202              | 1690                                  | T1/T2; N1-9     | 50.0 (44.0-56.0)          | 5.0 (4.6-5.7)                | Francis, 2008, Australia[64]                                                          |
| ECOG EST2197              | Jul 1998 - Jan 2000 | Chemo               | Tam            | 2952              | 1826                                  | T1/T2; N0, N1-9 | 51.0 (45.0-58.0)          | 11.9 (9.2-12.4)              | Goldstein, 2008, USA[65]                                                              |
| NSABP B-30                | Mar 1999 - Mar 2004 | Chemo               | Tam            | 5351              | 2421                                  | T1/T2; N1-9     | 51.0 (45.0-58.0)          | 6.6 (5.5-7.9)                | Swain, 2010, USA[66]                                                                  |
| GEICAM 9805/TARGET 0      | Jun 1999 - Mar 2003 | Chemo               | Tam            | 1060              | 576                                   | T1/T2; N0       | 51.0 (44.0-58.0)          | 9.3 (8.7-10.3)               | Martín, 2010, Spain[67]                                                               |
| GEPARDUO Germany          | Jun 1999 - Sep 2001 | Chemo               | Tam            | 910               | 387                                   | T1/T2; N0, N1-3 | 53.0 (45.0-61.0)          | 5.9 (5.6-6.3)                | von Minckwitz, 2005, Germany[68]                                                      |
| ECOG EST1199              | Oct 1999 - Jan 2002 | Chemo               | Tam/Al         | 5052              | 2821                                  | T1/T2; N0, N1-9 | 52.0 (45.0-58.0)          | 10.2 (8.1-11.0)              | Sparano, 2008, USA[69]                                                                |
| GEICAM 9906 Spain         | Nov 1999 - Jun 2002 | Chemo               | Tam/Al         | 1246              | 878                                   | T1/T2; N1-9     | 50.0 (43.0-58.0)          | 10.4 (9.4-11.0)              | Martín, 2008, Spain[70]                                                               |
| USO 99-016                | Jan 2000 - Mar 2002 | Chemo               | Tam/Al         | 1830              | 918                                   | T1/T2; N0, N1-9 | 52.1 (45.5-58.6)          | 5.2 (3.9-5.5)                | Loesch, 2010, USA[71]                                                                 |
| NSABP B-31                | Feb 2000 - Apr 2005 | Trastuzumab         | Tam            | 2101              | 873                                   | T1/T2; N1-9     | 48.0 (42.0-55.0)          | 8.8 (7.4-10.3)               | Romond, 2005, USA[72]                                                                 |
| HE 10/00 Greece           | Oct 2000 - Jun 2005 | Chemo               | Tam/Al         | 1121              | 598                                   | T1/T2; N0, N1-9 | 52.0 (44.0-62.0)          | 7.9 (7.0-9.2)                | Gogas, 2012, Greece[73]                                                               |
| NSABP B-34                | Jan 2001 - Mar 2004 | Bispho              | Tam/Al         | 3323              | 2371                                  | T1/T2; N0, N1-9 | 54.0 (47.0-61.0)          | 9.2 (8.2-10.1)               | Paterson, 2012, USA[74]                                                               |
| TEAM                      | Jan 2001 - Jan 2006 | ET                  | Tam/Al         | 9779              | 7513                                  | T1/T2; N0, N1-9 | 62.0 (57.0-68.0)          | 5.1 (4.0-5.9)                | van de Velde, 2011, Netherlands[75]                                                   |
| PACS 04 France            | Feb 2001 - Aug 2004 | Chemo/Trastz.       | Tam/Al         | 3010              | 2140                                  | T1/T2; N1-9     | 50.5 (44.0-56.0)          | 9.2 (6.8-10.0)               | Spielmann, 2009, France[76]                                                           |
| TACT UK                   | Feb 2001 - Jul 2003 | Chemo               | Tam/Al         | 4162              | 2582                                  | T1/T2; N0, N1-9 | 49.0 (43.0-54.0)          | 7.9 (6.3-8.7)                | Ellis, 2009, UK[77]                                                                   |
| EORTC10994/BIG 0-01       | Apr 2001 - Nov 2006 | Chemo               | Tam/Al         | 1856              | 784                                   | T1/T2; N0, N1-9 | 48.0 (43.0-55.0)          | 4.5 (3.5-5.6)                | Bonnefoi, 2011, France[78]                                                            |

| Trial group or study name | Accrual period      | Factor(s) evaluated | ET agents | Number randomized | Characteristics of the selected women |                 |                           |                              | First author, year, corresponding author's country [and number in list of references] |
|---------------------------|---------------------|---------------------|-----------|-------------------|---------------------------------------|-----------------|---------------------------|------------------------------|---------------------------------------------------------------------------------------|
|                           |                     |                     |           |                   | Number selected                       | TN status       | Median years of age (IQR) | Median years follow-up (IQR) |                                                                                       |
| NSABP B-33 I42            | May 2001 - Oct 2003 | ET                  | Tam/Al    | 1598              | 689                                   | T1/T2; N0, N1-9 | 54.0 (49.0-62.0)          | 12.3 (11.7-12.9)             | Mamounas, 2008, USA[79]                                                               |
| CALGB 49907               | Sep 2001 - Dec 2006 | Chemo               | Tam/Al    | 633               | 288                                   | T1/T2; N0, N1-9 | 69.0 (67.0-72.0)          | 6.4 (5.4-7.6)                | Muss, 2009, USA[80]                                                                   |
| LMU Munich ADEBAR         | Sep 2001 - May 2005 | Chemo               | Tam/Al    | 1493              | 511                                   | T1/T2; N1-9     | 55.0 (46.0-63.0)          | 5.2 (3.4-5.8)                | Janni, 2016, Germany[81]                                                              |
| PACS 05 France            | Aug 2002 - Sep 2006 | Chemo               | Tam/Al    | 1515              | 987                                   | T1/T2; N0       | 50.0 (44.0-56.0)          | 6.0 (5.1-7.1)                | Kerbrat, 2012, France[82]                                                             |
| GIM 2 Italy               | Apr 2003 - Jul 2006 | Chemo               | Tam       | 2091              | 1332                                  | T1/T2; N1-9     | 51.0 (44.0-59.0)          | 7.0 (6.0-7.7)                | Del Mastro, 2015, Italy[83]                                                           |
| Novartis ZO-FAST          | May 2003 - Aug 2004 | Bisph               | Al        | 1065              | 998                                   | T1/T2; N0, N1-9 | 58.0 (52.0-64.0)          | 5.1 (5.0-5.5)                | Bundred, 2008, UK[84]                                                                 |
| ELDA Naples               | Jul 2003 - Apr 2011 | Chemo               | Tam/Al    | 302               | 164                                   | T1/T2; N0, N1-9 | 69.0 (67.0-71.5)          | 5.9 (4.1-7.3)                | Perrone, 2015, Italy[85]                                                              |
| GEICAM 2003-02            | Sep 2003 - Oct 2008 | Chemo               | Tam/Al    | 1925              | 1272                                  | T1/T2; N0, N1-3 | 50.0 (44.0-59.0)          | 5.3 (4.3-6.1)                | Martín, 2013, Spain[86]                                                               |
| IT Naples HOBOE           | Mar 2004 - Jan 2010 | ET/Bisph            | Tam/Al    | 227               | 88                                    | T1/T2; N0       | 61.5 (55.5-66.0)          | 5.7 (4.5-7.3)                | Rossi, 2009, Italy/Nuzzo, 2012[87, 88]                                                |
| Novartis E-ZO-FAST        | Mar 2004 - Aug 2005 | Bisph               | Al        | 527               | 495                                   | T1/T2; N0, N1-9 | 57.0 (52.0-63.0)          | 5.1 (5.0-5.5)                | Llombart, 2012, Spain[89]                                                             |
| GAIN/GBG 33 Germany       | Aug 2004 - Jul 2008 | Bisph/Chemo         | Tam/Al    | 3023              | 1956                                  | T1/T2; N1-3     | 50.0 (43.0-58.0)          | 3.2 (2.4-4.3)                | von Minckwitz, 2013, Germany[90]                                                      |
| TACT2                     | Dec 2005 - Dec 2008 | Chemo               | Tam/Al    | 4371              | 2900                                  | T1/T2; N0, N1-9 | 51.0 (45.0-58.0)          | 7.1 (6.2-8.0)                | Cameron, 2012, UK[91]                                                                 |

### References to the 88 trials (91 references, as 3 trials require 2 references)

1. Rutqvist, L.E., H. Johansson, and G. Stockholm Breast Cancer Study, *Long-term follow-up of the randomized Stockholm trial on adjuvant tamoxifen among postmenopausal patients with early stage breast cancer*. *Acta Oncol*, 2007. **46**(2): p. 133-45.
2. Stewart, H.J., R.J. Prescott, and A.P. Forrest, *Scottish adjuvant tamoxifen trial: a randomized study updated to 15 years*. *J Natl Cancer Inst*, 2001. **93**(6): p. 456-62.
3. Fisher, B., et al., *Five versus more than five years of tamoxifen therapy for breast cancer patients with negative lymph nodes and estrogen receptor-positive tumors*. *J Natl Cancer Inst*, 1996. **88**(21): p. 1529-42.
4. Tormey, D.C., et al., *Adjuvant therapy with a doxorubicin regimen and long-term tamoxifen in premenopausal breast cancer patients: an Eastern Cooperative Oncology Group trial*. *J Clin Oncol*, 1992. **10**(12): p. 1848-56.
5. Falkson, H.C., et al., *Adjuvant trial of 12 cycles of CMFPT followed by observation or continuous tamoxifen versus four cycles of CMFPT in postmenopausal women with breast cancer: an Eastern Cooperative Oncology Group phase III study*. *J Clin Oncol*, 1990. **8**(4): p. 599-607.
6. *Randomized trial of two versus five years of adjuvant tamoxifen for postmenopausal early stage breast cancer*. *Swedish Breast Cancer Cooperative Group*. *J Natl Cancer Inst*, 1996. **88**(21): p. 1543-9.
7. Boccardo, F., et al., *Chemotherapy versus tamoxifen versus chemotherapy plus tamoxifen in node-positive, oestrogen receptor-positive breast cancer patients. Very late results of the 'gruppo di ricerca per la chemio-ormonoterapia adiuvante (GROCTA)' 01-Trial in early breast cancer*. *Breast Cancer Res Treat*, 2011. **126**(3): p. 653-61.
8. Forrest, A.P., et al., *Randomised controlled trial of conservation therapy for breast cancer: 6-year analysis of the Scottish trial*. *Scottish Cancer Trials Breast Group*. *Lancet*, 1996. **348**(9029): p. 708-13.
9. International Breast Cancer Study, G., *Effectiveness of adjuvant chemotherapy in combination with tamoxifen for node-positive postmenopausal breast cancer patients*. *J Clin Oncol*, 1997. **15**(4): p. 1385-94.
10. Hackshaw, A., et al., *Long-term benefits of 5 years of tamoxifen: 10-year follow-up of a large randomized trial in women at least 50 years of age with early breast cancer*. *J Clin Oncol*, 2011. **29**(13): p. 1657-63.
11. Mustacchi, G., et al., *Update of the Phase III trial 'GRETA' of surgery and tamoxifen versus tamoxifen alone for early breast cancer in elderly women*. *Future Oncol*, 2015. **11**(6): p. 933-41.

12. Piccart, M.J., et al., *Phase III trial comparing two dose levels of epirubicin combined with cyclophosphamide with cyclophosphamide, methotrexate, and fluorouracil in node-positive breast cancer*. J Clin Oncol, 2001. **19**(12): p. 3103-10.
13. Aebi, S., et al., *Differential efficacy of three cycles of CMF followed by tamoxifen in patients with ER-positive and ER-negative tumors: long-term follow up on IBCSG Trial IX*. Ann Oncol, 2011. **22**(9): p. 1981-7.
14. Fisher, B., et al., *Tamoxifen and chemotherapy for lymph node-negative, estrogen receptor-positive breast cancer*. J Natl Cancer Inst, 1997. **89**(22): p. 1673-82.
15. Boccardo, F., et al., *Cyclophosphamide, methotrexate, and fluorouracil versus tamoxifen plus ovarian suppression as adjuvant treatment of estrogen receptor-positive pre-/perimenopausal breast cancer patients: results of the Italian Breast Cancer Adjuvant Study Group 02 randomized trial*. boccardo@hp380.ist.unige.it. J Clin Oncol, 2000. **18**(14): p. 2718-27.
16. Albain, K.S., et al., *Adjuvant chemotherapy and timing of tamoxifen in postmenopausal patients with endocrine-responsive, node-positive breast cancer: a phase 3, open-label, randomised controlled trial*. Lancet, 2009. **374**(9707): p. 2055-63.
17. Davidson, N.E., et al., *Chemoendocrine therapy for premenopausal women with axillary lymph node-positive, steroid hormone receptor-positive breast cancer: results from INT 0101 (E5188)*. J Clin Oncol, 2005. **23**(25): p. 5973-82.
18. Sacco, M., et al., *Randomized trial of 2 versus 5 years of adjuvant tamoxifen for women aged 50 years or older with early breast cancer: Italian Interdisciplinary Group Cancer Evaluation Study of Adjuvant Treatment in Breast Cancer 01*. J Clin Oncol, 2003. **21**(12): p. 2276-81.
19. Hutchins, L.F., et al., *Randomized, controlled trial of cyclophosphamide, methotrexate, and fluorouracil versus cyclophosphamide, doxorubicin, and fluorouracil with and without tamoxifen for high-risk, node-negative breast cancer: treatment results of Intergroup Protocol INT-0102*. J Clin Oncol, 2005. **23**(33): p. 8313-21.
20. Andersen, J., et al., *Tamoxifen for one year versus two years versus 6 months of Tamoxifen and 6 months of megestrol acetate: a randomized comparison in postmenopausal patients with high-risk breast cancer (DBCG 89C)*. Acta Oncol, 2008. **47**(4): p. 718-24.
21. Powles, T.J., et al., *Randomized trial of chemoendocrine therapy started before or after surgery for treatment of primary breast cancer*. J Clin Oncol, 1995. **13**(3): p. 547-52.
22. Jakesz, R., et al., *Randomized adjuvant trial of tamoxifen and goserelin versus cyclophosphamide, methotrexate, and fluorouracil: evidence for the superiority of treatment with endocrine blockade in premenopausal patients with hormone-responsive breast cancer--Austrian Breast and Colorectal Cancer Study Group Trial 5*. J Clin Oncol, 2002. **20**(24): p. 4621-7.
23. Schmid, M., et al., *Randomized trial of tamoxifen versus tamoxifen plus aminoglutethimide as adjuvant treatment in postmenopausal breast cancer patients with hormone receptor-positive disease: Austrian breast and colorectal cancer study group trial 6*. J Clin Oncol, 2003. **21**(6): p. 984-90.
24. Gray, R.G., et al., *aTTom: Long-term effects of continuing adjuvant tamoxifen to 10 years versus stopping at 5 years in 6,953 women with early breast cancer*. J Clin Oncol, 2013. **31**(suppl; abstr 5).
25. Bliss, J., et al., *Evaluation of the tolerability of FE50C versus FE75C in a prospective randomised trial in adjuvant breast cancer patients*. J. Clin. Oncol., 2002. **20**(15S #2017).
26. Love, R.R., et al., *Oophorectomy and tamoxifen adjuvant therapy in premenopausal Vietnamese and Chinese women with operable breast cancer*. J Clin Oncol, 2002. **20**(10): p. 2559-66.
27. Boccardo, F., et al., *Sequential tamoxifen and aminoglutethimide versus tamoxifen alone in the adjuvant treatment of postmenopausal breast cancer patients: results of an Italian cooperative study*. J Clin Oncol, 2001. **19**(22): p. 4209-15.
28. Venturini, M., et al., *Dose-dense adjuvant chemotherapy in early breast cancer patients: results from a randomized trial*. J Natl Cancer Inst, 2005. **97**(23): p. 1724-33.
29. Adjuvant Breast Cancer Trials Collaborative, G., *Ovarian ablation or suppression in premenopausal early breast cancer: results from the international adjuvant breast cancer ovarian ablation or suppression randomized trial*. J Natl Cancer Inst, 2007. **99**(7): p. 516-25.
30. Adjuvant Breast Cancer Trials Collaborative, G., *Polychemotherapy for early breast cancer: results from the international adjuvant breast cancer chemotherapy randomized trial*. J Natl Cancer Inst, 2007. **99**(7): p. 506-15.

31. Bramwell, V.H., et al., *A randomized placebo-controlled study of tamoxifen after adjuvant chemotherapy in premenopausal women with early breast cancer (National Cancer Institute of Canada--Clinical Trials Group Trial, MA.12)*. *Ann Oncol*, 2010. **21**(2): p. 283-90.
32. Kaufmann, M., et al., *Tamoxifen versus control after adjuvant, risk-adapted chemotherapy in postmenopausal, receptor-negative patients with breast cancer: a randomized trial (GABG-IV D-93)--the German Adjuvant Breast Cancer Group*. *J Clin Oncol*, 2005. **23**(31): p. 7842-8.
33. International Breast Cancer Study, G., et al., *Randomized trial comparing axillary clearance versus no axillary clearance in older patients with breast cancer: first results of International Breast Cancer Study Group Trial 10-93*. *J Clin Oncol*, 2006. **24**(3): p. 337-44.
34. Thurlimann, B., et al., *Is chemotherapy necessary for premenopausal women with lower-risk node-positive, endocrine responsive breast cancer? 10-year update of International Breast Cancer Study Group Trial 11-93*. *Breast Cancer Res Treat*, 2009. **113**(1): p. 137-44.
35. International Breast Cancer Study, G., et al., *Toremifene and tamoxifen are equally effective for early-stage breast cancer: first results of International Breast Cancer Study Group Trials 12-93 and 14-93*. *Ann Oncol*, 2004. **15**(12): p. 1749-59.
36. International Breast Cancer Study, G., et al., *Tamoxifen after adjuvant chemotherapy for premenopausal women with lymph node-positive breast cancer: International Breast Cancer Study Group Trial 13-93*. *J Clin Oncol*, 2006. **24**(9): p. 1332-41.
37. International Breast Cancer Study, G., et al., *Effects of a treatment gap during adjuvant chemotherapy in node-positive breast cancer: results of International Breast Cancer Study Group (IBCSG) Trials 13-93 and 14-93*. *Ann Oncol*, 2007. **18**(7): p. 1177-84.
38. Buzdar, A.U., et al., *Evaluation of paclitaxel in adjuvant chemotherapy for patients with operable breast cancer: preliminary data of a prospective randomized trial*. *Clin Cancer Res*, 2002. **8**(5): p. 1073-9.
39. Hughes, K.S., et al., *Lumpectomy plus tamoxifen with or without irradiation in women 70 years of age or older with early breast cancer*. *N Engl J Med*, 2004. **351**(10): p. 971-7.
40. Tevaarwerk, A.J., et al., *Phase III comparison of tamoxifen versus tamoxifen plus ovarian function suppression in premenopausal women with node-negative, hormone receptor-positive breast cancer (E-3193, INT-0142): a trial of the Eastern Cooperative Oncology Group*. *J Clin Oncol*, 2014. **32**(35): p. 3948-58.
41. Piccart, M.J., A. Goldhirsch, and o.b.o.t.B.I. Group, *An overview of recent and ongoing adjuvant clinical trials for breast cancer*. second ed, ed. L. Biganzoli and S. C. 2000, Brussels (Belgium): Moreau P.C.E.
42. Green, M.C., et al., *Weekly paclitaxel improves pathologic complete remission in operable breast cancer when compared with paclitaxel once every 3 weeks*. *J Clin Oncol*, 2005. **23**(25): p. 5983-92.
43. Pico, C., et al., *Epirubicin-cyclophosphamide adjuvant chemotherapy plus tamoxifen administered concurrently versus sequentially: randomized phase III trial in postmenopausal node-positive breast cancer patients. A GEICAM 9401 study*. *Ann Oncol*, 2004. **15**(1): p. 79-87.
44. Polyzos, A., et al., *FEC versus sequential docetaxel followed by epirubicin/cyclophosphamide as adjuvant chemotherapy in women with axillary node-positive early breast cancer: a randomized study of the Hellenic Oncology Research Group (HORG)*. *Breast Cancer Res Treat*, 2010. **119**(1): p. 95-104.
45. Colleoni, M., et al., *The effect of endocrine responsiveness on high-risk breast cancer treated with dose-intensive chemotherapy: results of International Breast Cancer Study Group Trial 15-95 after prolonged follow-up*. *Ann Oncol*, 2009. **20**(8): p. 1344-51.
46. Leone, J.P., et al., *Sixteen years follow-up results of a randomized phase II trial of neoadjuvant fluorouracil, doxorubicin, and cyclophosphamide (FAC) compared with cyclophosphamide, methotrexate, and 5-fluorouracil (CMF) in stage III breast cancer: GOCS experience*. *Breast Cancer Res Treat*, 2014. **143**(2): p. 313-23.
47. Mamounas, E.P., et al., *Paclitaxel after doxorubicin plus cyclophosphamide as adjuvant chemotherapy for node-positive breast cancer: results from NSABP B-28*. *J Clin Oncol*, 2005. **23**(16): p. 3686-96.
48. Rao, R.D., et al., *Phase III double-blind, placebo-controlled, prospective randomized trial of adjuvant tamoxifen vs. tamoxifen and fenretinide in postmenopausal women with positive receptors (EB193): an intergroup trial coordinated by the Eastern Cooperative Oncology Group*. *Med Oncol*, 2011. **28 Suppl 1**: p. S39-47.
49. Baum, M., et al., *Anastrozole alone or in combination with tamoxifen versus tamoxifen alone for adjuvant treatment of postmenopausal women with early breast cancer: first results of the ATAC randomised trial*. *Lancet*, 2002. **359**(9324): p. 2131-9.

50. Gianni, L., et al., *Feasibility and tolerability of sequential doxorubicin/paclitaxel followed by cyclophosphamide, methotrexate, and fluorouracil and its effects on tumor response as preoperative therapy*. Clin Cancer Res, 2005. **11**(24 Pt 1): p. 8715-21.
51. Gianni, L., et al., *Phase III trial evaluating the addition of paclitaxel to doxorubicin followed by cyclophosphamide, methotrexate, and fluorouracil, as adjuvant or primary systemic therapy: European Cooperative Trial in Operable Breast Cancer*. J Clin Oncol, 2009. **27**(15): p. 2474-81.
52. Del Mastro, L., et al., *5-Fluorouracil, epirubicin and cyclophosphamide versus epirubicin and paclitaxel in node-positive early breast cancer: a phase-III randomized GONO-MIG5 trial*. Breast Cancer Res Treat, 2016. **155**(1): p. 117-26.
53. Davies, C., et al., *Long-term effects of continuing adjuvant tamoxifen to 10 years versus stopping at 5 years after diagnosis of oestrogen receptor-positive breast cancer: ATLAS, a randomised trial*. Lancet, 2013. **381**(9869): p. 805-16.
54. Kaufmann, M., et al., *Improved overall survival in postmenopausal women with early breast cancer after anastrozole initiated after treatment with tamoxifen compared with continued tamoxifen: the ARNO 95 Study*. J Clin Oncol, 2007. **25**(19): p. 2664-70.
55. Boccardo, F., et al., *Epirubicin followed by cyclophosphamide, methotrexate and 5-fluorouracil versus paclitaxel followed by epirubicin and vinorelbine in patients with high-risk operable breast cancer*. Oncology, 2010. **78**(3-4): p. 274-81.
56. Martin, M., et al., *Adjuvant docetaxel for node-positive breast cancer*. N Engl J Med, 2005. **352**(22): p. 2302-13.
57. Roche, H., et al., *Sequential adjuvant epirubicin-based and docetaxel chemotherapy for node-positive breast cancer patients: the FNCLCC PACS 01 Trial*. J Clin Oncol, 2006. **24**(36): p. 5664-71.
58. Jones, S.E., et al., *Phase III trial comparing doxorubicin plus cyclophosphamide with docetaxel plus cyclophosphamide as adjuvant therapy for operable breast cancer*. J Clin Oncol, 2006. **24**(34): p. 5381-7.
59. Coombes, R.C., et al., *Randomized, phase III trial of sequential epirubicin and docetaxel versus epirubicin alone in postmenopausal patients with node-positive breast cancer*. J Clin Oncol, 2011. **29**(24): p. 3247-54.
60. Amadori, D., et al., *Randomized phase III trial of adjuvant epirubicin followed by cyclophosphamide, methotrexate, and 5-fluorouracil (CMF) versus CMF followed by epirubicin in patients with node-negative or 1-3 node-positive rapidly proliferating breast cancer*. Breast Cancer Res Treat, 2011. **125**(3): p. 775-84.
61. Coombes, R.C., et al., *A randomized trial of exemestane after two to three years of tamoxifen therapy in postmenopausal women with primary breast cancer*. N Engl J Med, 2004. **350**(11): p. 1081-92.
62. Regan, M.M., et al., *Assessment of letrozole and tamoxifen alone and in sequence for postmenopausal women with steroid hormone receptor-positive breast cancer: the BIG 1-98 randomised clinical trial at 8.1 years median follow-up*. Lancet Oncol, 2011. **12**(12): p. 1101-8.
63. Boccardo, F., et al., *Switching to anastrozole versus continued tamoxifen treatment of early breast cancer: preliminary results of the Italian Tamoxifen Anastrozole Trial*. J Clin Oncol, 2005. **23**(22): p. 5138-47.
64. Francis, P., et al., *Adjuvant chemotherapy with sequential or concurrent anthracycline and docetaxel: Breast International Group 02-98 randomized trial*. J Natl Cancer Inst, 2008. **100**(2): p. 121-33.
65. Goldstein, L.J., et al., *Concurrent doxorubicin plus docetaxel is not more effective than concurrent doxorubicin plus cyclophosphamide in operable breast cancer with 0 to 3 positive axillary nodes: North American Breast Cancer Intergroup Trial E 2197*. J Clin Oncol, 2008. **26**(25): p. 4092-9.
66. Swain, S.M., et al., *Longer therapy, iatrogenic amenorrhea, and survival in early breast cancer*. N Engl J Med, 2010. **362**(22): p. 2053-65.
67. Martin, M., et al., *Adjuvant docetaxel for high-risk, node-negative breast cancer*. N Engl J Med, 2010. **363**(23): p. 2200-10.
68. von Minckwitz, G., et al., *Doxorubicin with cyclophosphamide followed by docetaxel every 21 days compared with doxorubicin and docetaxel every 14 days as preoperative treatment in operable breast cancer: the GEPARUO study of the German Breast Group*. J Clin Oncol, 2005. **23**(12): p. 2676-85.
69. Sparano, J.A., et al., *Weekly paclitaxel in the adjuvant treatment of breast cancer*. N Engl J Med, 2008. **358**(16): p. 1663-71.
70. Martin, M., et al., *Randomized phase 3 trial of fluorouracil, epirubicin, and cyclophosphamide alone or followed by Paclitaxel for early breast cancer*. J Natl Cancer Inst, 2008. **100**(11): p. 805-14.



71. Loesch, D., et al., *Phase III multicenter trial of doxorubicin plus cyclophosphamide followed by paclitaxel compared with doxorubicin plus paclitaxel followed by weekly paclitaxel as adjuvant therapy for women with high-risk breast cancer*. J Clin Oncol, 2010. **28**(18): p. 2958-65.
72. Romond, E.H., et al., *Trastuzumab plus adjuvant chemotherapy for operable HER2-positive breast cancer*. N Engl J Med, 2005. **353**(16): p. 1673-84.
73. Gogas, H., et al., *Postoperative dose-dense sequential versus concomitant administration of epirubicin and paclitaxel in patients with node-positive breast cancer: 5-year results of the Hellenic Cooperative Oncology Group HE 10/00 phase III Trial*. Breast Cancer Res Treat, 2012. **132**(2): p. 609-19.
74. Paterson, A.H., et al., *Oral clodronate for adjuvant treatment of operable breast cancer (National Surgical Adjuvant Breast and Bowel Project protocol B-34): a multicentre, placebo-controlled, randomised trial*. Lancet Oncol, 2012. **13**(7): p. 734-42.
75. van de Velde, C.J., et al., *Adjuvant tamoxifen and exemestane in early breast cancer (TEAM): a randomised phase 3 trial*. Lancet, 2011. **377**(9762): p. 321-31.
76. Spielmann, M., et al., *Trastuzumab for patients with axillary-node-positive breast cancer: results of the FNCLCC-PACS 04 trial*. J Clin Oncol, 2009. **27**(36): p. 6129-34.
77. Ellis, P., et al., *Sequential docetaxel as adjuvant chemotherapy for early breast cancer (TACT): an open-label, phase III, randomised controlled trial*. Lancet, 2009. **373**(9676): p. 1681-92.
78. Bonnefoi, H., et al., *TP53 status for prediction of sensitivity to taxane versus non-taxane neoadjuvant chemotherapy in breast cancer (EORTC 10994/BIG 1-00): a randomised phase 3 trial*. Lancet Oncol, 2011. **12**(6): p. 527-39.
79. Mamounas, E.P., et al., *Benefit from exemestane as extended adjuvant therapy after 5 years of adjuvant tamoxifen: intention-to-treat analysis of the National Surgical Adjuvant Breast And Bowel Project B-33 trial*. J Clin Oncol, 2008. **26**(12): p. 1965-71.
80. Muss, H.B., et al., *Adjuvant chemotherapy in older women with early-stage breast cancer*. N Engl J Med, 2009. **360**(20): p. 2055-65.
81. Janni, W., et al., *Randomised phase III trial of FEC120 vs EC-docetaxel in patients with high-risk node-positive primary breast cancer: final survival analysis of the ADEBAR study*. Br J Cancer, 2016. **114**(8): p. 863-71.
82. Kerbrat, P., et al., *Optimal duration of adjuvant chemotherapy for high risk node negative breast cancer patients: 6-year results of the prospective randomized phase III trial PACS 05*. Cancer Res, 2012. **72**(24 Suppl:Abstract nr P11304).
83. Del Mastro, L., et al., *Fluorouracil and dose-dense chemotherapy in adjuvant treatment of patients with early-stage breast cancer: an open-label, 2 x 2 factorial, randomised phase 3 trial*. Lancet, 2015. **385**(9980): p. 1863-72.
84. Bundred, N.J., et al., *Effective inhibition of aromatase inhibitor-associated bone loss by zoledronic acid in postmenopausal women with early breast cancer receiving adjuvant letrozole: ZO-FAST Study results*. Cancer, 2008. **112**(5): p. 1001-10.
85. Perrone, F., et al., *Weekly docetaxel versus CMF as adjuvant chemotherapy for older women with early breast cancer: final results of the randomized phase III ELDA trial*. Ann Oncol, 2015. **26**(4): p. 675-82.
86. Martin, M., et al., *Fluorouracil, doxorubicin, and cyclophosphamide (FAC) versus FAC followed by weekly paclitaxel as adjuvant therapy for high-risk, node-negative breast cancer: results from the GECAM/2003-02 study*. J Clin Oncol, 2013. **31**(20): p. 2593-9.
87. Rossi, E., et al., *Endocrine effects of adjuvant letrozole compared with tamoxifen in hormone-responsive postmenopausal patients with early breast cancer: the HOBOE trial*. J Clin Oncol, 2009. **27**(19): p. 3192-7.
88. Nuzzo, F., et al., *Bone effect of adjuvant tamoxifen, letrozole or letrozole plus zoledronic acid in early-stage breast cancer: the randomized phase 3 HOBOE study*. Ann Oncol, 2012. **23**(8): p. 2027-33.
89. Llombart, A., et al., *Immediate Administration of Zoledronic Acid Reduces Aromatase Inhibitor-Associated Bone Loss in Postmenopausal Women With Early Breast Cancer: 12-month analysis of the E-ZO-FAST trial*. Clin Breast Cancer, 2012. **12**(1): p. 40-8.
90. von Minckwitz, G., et al., *German adjuvant intergroup node-positive study: a phase III trial to compare oral ibandronate versus observation in patients with high-risk early breast cancer*. J Clin Oncol, 2013. **31**(28): p. 3531-9.
91. Cameron, D., et al., *The UK TACT2 Trial: comparison of standard vs accelerated epirubicin in patients requiring chemotherapy for early breast cancer (EBC) (CRUK/05/019)*. Cancer Res, 2012. **72**(24 Suppl:Abstract nr S33).
